# Supplementary material for: Acetylation, Methylation and Allysine Modification Profile of Viral and Host Proteins during Influenza A Virus Infection
Source: Viruses. 2021 Jul 20;13(7):1415. doi: 10.3390/v13071415 (PMC8310381; doi:10.3390/v13071415)
Supplement: Supplementary file 1 [file viruses-13-01415-s001.zip]

Archive with 4 entries (4 files):
- viruses-1281647-supplementary/Supplementary_Table S3.xlsx
- viruses-1281647-supplementary/Supplementary_Table S4.xlsx
- viruses-1281647-supplementary/Supplementary_Table S5.xlsx
- viruses-1281647-supplementary/viruses-1281647 Supplementary Figure S1,S2 Table S1,S2.pdf
