# Supplementary material for: Acetylation, Methylation and Allysine Modification Profile of Viral and Host Proteins during Influenza A Virus Infection
Source: Viruses. 2021 Jul 20;13(7):1415. doi: 10.3390/v13071415 (PMC8310381; doi:10.3390/v13071415)
Supplement: Supplementary file 1 [file viruses-13-01415-s001.zip › viruses-1281647-supplementary/Supplementary_Table S3.xlsx]

## Sheet: Proteins
No.	Accession	Description	Coverage [%]	# Peptides	# Unique Peptides	# PSMs	# AAs	MW [kDa]	calc. pI	Score Sequest HT: Sequest HT	# Peptides (by Search Engine): Sequest HT	Sum PEP Score	Exp. q-value: Combined	Protein FDR Confidence: Combined
1	189458812	1,4-alpha-glucan-branching enzyme [Homo sapiens]	8	3	3	14	702	80.4	6.32	34.42	3	12.036	0	High
2	4504523	10 kDa heat shock protein, mitochondrial [Homo sapiens]	83	13	5	304	102	10.9	8.92	858.33	13	59.003	0	High
3	385298678	116 kDa U5 small nuclear ribonucleoprotein component isoform a [Homo sapiens]	24	18	17	155	972	109.4	5	407.78	18	91.6	0	High
4	4507949	14-3-3 protein beta/alpha [Homo sapiens]	72	23	13	688	246	28.1	4.83	2038.45	23	234.853	0	High
5	5803225	14-3-3 protein epsilon [Homo sapiens]	75	28	25	718	255	29.2	4.74	2081.5	28	235.529	0	High
6	4507951	14-3-3 protein eta [Homo sapiens]	55	18	13	346	246	28.2	4.84	961.08	18	118.698	0	High
7	21464101	14-3-3 protein gamma [Homo sapiens]	79	20	13	592	247	28.3	4.89	1674.91	20	156.701	0	High
8	5454052	14-3-3 protein sigma [Homo sapiens]	78	22	17	407	248	27.8	4.74	1034.43	22	156.927	0	High
9	5803227	14-3-3 protein theta [Homo sapiens]	73	24	17	631	245	27.7	4.78	1948.76	24	183.207	0	High
10	31542939	15-hydroxyprostaglandin dehydrogenase [NAD(+)] isoform 1 [Homo sapiens]	14	3	3	14	266	29	5.86	42.78	3	14.294	0	High
11	195972883	1-phosphatidylinositol 4,5-bisphosphate phosphodiesterase delta-1 isoform 1 [Homo sapiens]	4	2	2	2	777	88.1	7.23	8.59	2	10.251	0	High
12	94721261	2',3'-cyclic-nucleotide 3'-phosphodiesterase [Homo sapiens]	27	9	9	52	421	47.5	9.07	167.84	9	48.03	0	High
13	4503301	2,4-dienoyl-CoA reductase, mitochondrial precursor [Homo sapiens]	16	4	4	26	335	36	9.28	88.09	4	18.424	0	High
14	189027129	2',5'-phosphodiesterase 12 [Homo sapiens]	11	4	4	10	609	67.3	6.57	32.4	4	19.826	0	High
15	11321577	2'-5'-oligoadenylate synthase-like protein isoform a [Homo sapiens]	3	2	2	10	514	59.2	7.87	24.11	2	4.36	0.001	High
16	195539395	26S protease regulatory subunit 10B [Homo sapiens]	28	11	11	56	403	45.8	7.78	188.45	11	56.644	0	High
17	24430151	26S protease regulatory subunit 4 [Homo sapiens]	29	10	9	106	440	49.2	6.21	410.5	10	74.738	0	High
18	21361144	26S protease regulatory subunit 6A [Homo sapiens]	49	18	18	95	439	49.2	5.24	303.79	18	98.627	0	High
19	5729991	26S protease regulatory subunit 6B isoform 1 [Homo sapiens]	26	9	9	62	418	47.3	5.21	169.93	9	56.913	0	High
20	4506209	26S protease regulatory subunit 7 isoform 1 [Homo sapiens]	40	16	16	106	433	48.6	5.95	322.14	16	67.12	0	High
21	24497435	26S protease regulatory subunit 8 isoform 1 [Homo sapiens]	41	12	11	66	406	45.6	7.55	180.04	12	54.959	0	High
22	25777600	26S proteasome non-ATPase regulatory subunit 1 isoform 1 [Homo sapiens]	27	19	19	100	953	105.8	5.39	289.26	19	97.092	0	High
23	4506217	26S proteasome non-ATPase regulatory subunit 10 isoform 1 [Homo sapiens]	10	2	2	5	226	24.4	6.1	15.25	2	8.298	0	High
24	394953908	26S proteasome non-ATPase regulatory subunit 11 [Homo sapiens]	50	21	21	116	422	47.4	6.48	362.57	21	97.147	0	High
25	4506221	26S proteasome non-ATPase regulatory subunit 12 isoform 1 [Homo sapiens]	23	8	8	32	456	52.9	7.65	77.88	8	33.506	0	High
26	157502193	26S proteasome non-ATPase regulatory subunit 13 isoform 1 [Homo sapiens]	37	12	12	65	376	42.9	5.81	184	12	56.376	0	High
27	5031981	26S proteasome non-ATPase regulatory subunit 14 [Homo sapiens]	26	4	4	17	310	34.6	6.52	56.9	4	16.732	0	High
28	25777602	26S proteasome non-ATPase regulatory subunit 2 isoform 1 [Homo sapiens]	31	20	20	125	908	100.1	5.2	356.65	20	103.701	0	High
29	25777612	26S proteasome non-ATPase regulatory subunit 3 [Homo sapiens]	23	11	11	60	534	60.9	8.44	157.67	11	47.809	0	High
30	5292161	26S proteasome non-ATPase regulatory subunit 4 [Homo sapiens]	26	7	7	31	377	40.7	4.79	67.89	7	27.942	0	High
31	4826952	26S proteasome non-ATPase regulatory subunit 5 isoform 1 [Homo sapiens]	14	5	5	22	504	56.2	5.48	74.24	5	26.529	0	High
32	422398832	26S proteasome non-ATPase regulatory subunit 6 isoform 1 [Homo sapiens]	22	9	9	23	442	51.9	6.74	67.29	9	26.203	0	High
33	25777615	26S proteasome non-ATPase regulatory subunit 7 [Homo sapiens]	30	9	9	69	324	37	6.77	220.55	9	60.436	0	High
34	156631005	26S proteasome non-ATPase regulatory subunit 8 [Homo sapiens]	11	4	4	12	350	39.6	9.7	27.93	4	14.18	0	High
35	7657441	28 kDa heat- and acid-stable phosphoprotein [Homo sapiens]	22	3	3	19	181	20.6	8.87	42.59	3	12.775	0	High
36	7705425	28S ribosomal protein S17, mitochondrial [Homo sapiens]	38	3	3	14	130	14.5	9.85	50.99	3	13.858	0	High
37	9910244	28S ribosomal protein S22, mitochondrial [Homo sapiens]	11	3	3	13	360	41.3	7.9	34.33	3	14.917	0	High
38	16554604	28S ribosomal protein S23, mitochondrial [Homo sapiens]	16	3	3	9	190	21.8	8.9	28.13	3	9.306	0	High
39	14028877	28S ribosomal protein S25, mitochondrial [Homo sapiens]	19	2	2	8	173	20.1	8.82	16.15	2	18.173	0	High
40	557948093	28S ribosomal protein S27, mitochondrial isoform 1 [Homo sapiens]	11	4	4	23	428	49.1	6.33	73.68	4	20.831	0	High
41	16905526	28S ribosomal protein S29, mitochondrial isoform 1 [Homo sapiens]	19	6	6	32	398	45.5	8.88	117.19	6	37.569	0	High
42	186928854	28S ribosomal protein S31, mitochondrial [Homo sapiens]	10	3	3	7	395	45.3	9.29	22.73	3	11.361	0	High
43	16950603	28S ribosomal protein S35, mitochondrial isoform 1 precursor [Homo sapiens]	24	5	5	15	323	36.8	8.24	43.03	5	23.373	0	High
44	15150811	28S ribosomal protein S36, mitochondrial [Homo sapiens]	30	2	2	18	103	11.5	9.99	53.74	2	13.114	0	High
45	13994259	28S ribosomal protein S5, mitochondrial [Homo sapiens]	6	2	2	9	430	48	9.92	30.87	2	8.853	0	High
46	186928852	28S ribosomal protein S7, mitochondrial [Homo sapiens]	25	5	5	21	242	28.1	9.99	58.09	5	15.221	0	High
47	51873036	2-oxoglutarate dehydrogenase, mitochondrial isoform 1 precursor [Homo sapiens]	11	8	8	32	1023	115.9	6.86	116.24	8	43.347	0	High
48	7705618	39S ribosomal protein L11, mitochondrial isoform a [Homo sapiens]	30	4	4	42	192	20.7	9.91	151.66	4	21.217	0	High
49	27436901	39S ribosomal protein L12, mitochondrial [Homo sapiens]	52	7	7	94	198	21.3	8.87	299.1	7	37.798	0	High
50	14165270	39S ribosomal protein L13, mitochondrial [Homo sapiens]	29	4	4	18	178	20.7	9.16	57.49	4	17.946	0	High
51	7661806	39S ribosomal protein L15, mitochondrial [Homo sapiens]	15	3	3	27	296	33.4	10.01	89.71	3	23.818	0	High
52	31652226	39S ribosomal protein L21, mitochondrial isoform d [Homo sapiens]	20	3	3	8	205	22.8	9.89	13.82	3	10.544	0	High
53	22035590	39S ribosomal protein L24, mitochondrial [Homo sapiens]	13	2	2	9	216	24.9	9.29	15.85	2	9.86	0	High
54	6005862	39S ribosomal protein L3, mitochondrial [Homo sapiens]	7	2	2	5	348	38.6	9.48	19.91	2	9.306	0	High
55	169636418	39S ribosomal protein L38, mitochondrial [Homo sapiens]	11	3	3	20	380	44.6	7.53	57.08	3	18.736	0	High
56	27886570	39S ribosomal protein L39, mitochondrial isoform b [Homo sapiens]	17	5	5	13	353	40.4	7.91	29.38	5	16.698	0	High
57	22547138	39S ribosomal protein L4, mitochondrial isoform a [Homo sapiens]	21	4	4	15	311	34.9	9.72	48.29	4	26.15	0	High
58	21265093	39S ribosomal protein L41, mitochondrial [Homo sapiens]	18	2	2	8	137	15.4	9.57	21.75	2	8.211	0	High
59	28872738	39S ribosomal protein L43, mitochondrial isoform d [Homo sapiens]	12	3	3	3	235	25.8	8.95	7.48	3	10.713	0	High
60	12597661	39S ribosomal protein L44, mitochondrial [Homo sapiens]	9	2	2	3	332	37.5	8.4	11.19	2	9.302	0	High
61	29826287	39S ribosomal protein L47, mitochondrial isoform a [Homo sapiens]	12	3	3	14	250	29.4	10.37	35.81	3	8.325	0	High
62	4826649	39S ribosomal protein L49, mitochondrial [Homo sapiens]	16	2	2	12	166	19.2	9.45	38.38	2	9.546	0	High
63	4758504	3-hydroxyacyl-CoA dehydrogenase type-2 isoform 1 [Homo sapiens]	89	15	15	223	261	26.9	7.78	858.7	15	167.924	0	High
64	23308751	3-hydroxyisobutyrate dehydrogenase, mitochondrial precursor [Homo sapiens]	32	8	8	75	336	35.3	8.13	286.26	8	62.684	0	High
65	37594471	3-hydroxyisobutyryl-CoA hydrolase, mitochondrial isoform 1 precursor [Homo sapiens]	6	2	2	4	386	43.5	8.19	15.06	2	7.434	0	High
66	167614485	3-ketoacyl-CoA thiolase, mitochondrial [Homo sapiens]	37	11	11	100	397	41.9	8.09	294.15	11	79.036	0	High
67	4501853	3-ketoacyl-CoA thiolase, peroxisomal isoform a [Homo sapiens]	17	4	4	16	424	44.3	8.44	38.2	4	27.167	0	High
68	194473668	3-mercaptopyruvate sulfurtransferase isoform 1 [Homo sapiens]	17	3	3	18	317	35.2	6.61	75.21	3	16.554	0	High
69	322303127	40S ribosomal protein S10 [Homo sapiens]	42	7	7	83	165	18.9	10.15	278.36	7	55.257	0	High
70	4506681	40S ribosomal protein S11 [Homo sapiens]	57	12	12	123	158	18.4	10.3	239.14	12	45.609	0	High
71	14277700	40S ribosomal protein S12 [Homo sapiens]	53	6	6	100	132	14.5	7.21	262.15	6	31.971	0	High
72	4506685	40S ribosomal protein S13 [Homo sapiens]	48	8	8	155	151	17.2	10.54	406.07	8	50.062	0	High
73	5032051	40S ribosomal protein S14 [Homo sapiens]	70	12	12	182	151	16.3	10.05	607.36	12	79.354	0	High
74	4506687	40S ribosomal protein S15 [Homo sapiens]	65	6	6	46	145	17	10.39	173.18	6	63.07	0	High
75	71772415	40S ribosomal protein S15a [Homo sapiens]	59	8	8	119	130	14.8	10.13	344.84	8	66.783	0	High
76	4506691	40S ribosomal protein S16 [Homo sapiens]	58	11	11	169	146	16.4	10.21	451.69	11	53.288	0	High
77	4506693	40S ribosomal protein S17 [Homo sapiens]	63	8	8	152	135	15.5	9.85	559.76	8	74.877	0	High
78	11968182	40S ribosomal protein S18 [Homo sapiens]	55	15	15	263	152	17.7	10.99	709.79	15	57.901	0	High
79	4506695	40S ribosomal protein S19 [Homo sapiens]	57	11	11	219	145	16.1	10.32	604.16	11	44.248	0	High
80	15055539	40S ribosomal protein S2 [Homo sapiens]	48	12	12	274	293	31.3	10.24	746.18	12	67.82	0	High
81	226246671	40S ribosomal protein S20 isoform 1 [Homo sapiens]	24	4	4	141	142	16	9.32	391.33	4	34.673	0	High
82	4506699	40S ribosomal protein S21 [Homo sapiens]	23	2	2	61	83	9.1	8.5	173.36	2	8.818	0	High
83	4506701	40S ribosomal protein S23 [Homo sapiens]	29	5	5	65	143	15.8	10.49	195.9	5	20.256	0	High
84	214010226	40S ribosomal protein S24 isoform d [Homo sapiens]	13	4	4	56	289	32.4	10.15	187.52	4	36.863	0	High
85	4506707	40S ribosomal protein S25 [Homo sapiens]	30	5	5	126	125	13.7	10.11	312.24	5	20.1	0	High
86	4506715	40S ribosomal protein S28 [Homo sapiens]	46	3	3	95	69	7.8	10.7	262.03	3	13.941	0	High
87	4506717	40S ribosomal protein S29 isoform 1 [Homo sapiens]	29	3	3	23	56	6.7	10.13	41.96	3	5.729	0.001	High
88	378548190	40S ribosomal protein S3 isoform 1 [Homo sapiens]	77	22	22	448	243	26.7	9.66	1263.91	22	103.867	0	High
89	4506723	40S ribosomal protein S3a isoform 1 [Homo sapiens]	69	22	22	382	264	29.9	9.73	952.87	22	128.005	0	High
90	4506725	40S ribosomal protein S4, X isoform X isoform [Homo sapiens]	53	16	16	337	263	29.6	10.15	916.73	16	99.401	0	High
91	13904870	40S ribosomal protein S5 [Homo sapiens]	59	10	10	215	204	22.9	9.72	664.99	10	77.356	0	High
92	17158044	40S ribosomal protein S6 [Homo sapiens]	47	13	13	208	249	28.7	10.84	558.97	13	67.324	0	High
93	4506741	40S ribosomal protein S7 [Homo sapiens]	68	15	15	188	194	22.1	10.1	475.91	15	75.59	0	High
94	4506743	40S ribosomal protein S8 [Homo sapiens]	52	12	12	246	208	24.2	10.32	788.43	12	82.471	0	High
95	9845502	40S ribosomal protein SA [Homo sapiens]	59	15	15	376	295	32.8	4.87	1430.86	15	132.57	0	High
96	18699732	45 kDa calcium-binding protein isoform 2 precursor [Homo sapiens]	6	2	2	3	362	41.8	4.86	8.43	2	6.96	0	High
97	61744477	4F2 cell-surface antigen heavy chain isoform b [Homo sapiens]	39	20	20	462	631	68.1	5.05	1547.62	20	155.058	0	High
98	115387104	4-trimethylaminobutyraldehyde dehydrogenase [Homo sapiens]	14	6	6	18	518	56.3	6.57	55.95	6	27.628	0	High
99	18860916	5'-3' exoribonuclease 2 [Homo sapiens]	29	17	17	82	950	108.5	7.47	274.4	17	80.069	0	High
100	5453746	5-formyltetrahydrofolate cyclo-ligase isoform a [Homo sapiens]	13	2	2	10	203	23.2	7.88	23.09	2	9.381	0	High
101	4758940	6.8 kDa mitochondrial proteolipid isoform 1 [Homo sapiens]	33	2	2	10	58	6.7	10.08	16.9	2	7.057	0	High
102	41399285	60 kDa heat shock protein, mitochondrial [Homo sapiens]	82	48	48	1714	573	61	5.87	6288.91	48	576.911	0	High
103	16933546	60S acidic ribosomal protein P0 [Homo sapiens]	62	15	15	480	317	34.3	5.97	1764.96	15	127.433	0	High
104	4506669	60S acidic ribosomal protein P1 isoform 1 [Homo sapiens]	68	4	3	114	114	11.5	4.32	578.63	4	56.186	0	High
105	4506671	60S acidic ribosomal protein P2 [Homo sapiens]	92	9	8	232	115	11.7	4.54	908.59	9	105.382	0	High
106	223890243	60S ribosomal protein L10 isoform a [Homo sapiens]	41	7	7	113	214	24.6	10.08	292.25	7	46.016	0	High
107	15431288	60S ribosomal protein L10a [Homo sapiens]	46	10	10	186	217	24.8	9.94	432.29	10	74.408	0	High
108	15431290	60S ribosomal protein L11 isoform 1 [Homo sapiens]	43	7	7	108	178	20.2	9.6	350.66	7	44.325	0	High
109	4506597	60S ribosomal protein L12 [Homo sapiens]	59	7	7	246	165	17.8	9.42	802.16	7	67.188	0	High
110	15431295	60S ribosomal protein L13 isoform 1 [Homo sapiens]	49	13	13	168	211	24.2	11.65	451.37	13	53.222	0	High
111	6912634	60S ribosomal protein L13a isoform 1 [Homo sapiens]	32	7	7	102	203	23.6	10.93	200.55	7	23.968	0	High
112	78000183	60S ribosomal protein L14 [Homo sapiens]	21	4	4	118	215	23.4	10.93	334.87	4	20.915	0	High
113	15431293	60S ribosomal protein L15 isoform 1 [Homo sapiens]	43	8	8	149	204	24.1	11.62	403.06	8	55.926	0	High
114	4506607	60S ribosomal protein L18 isoform 1 [Homo sapiens]	43	8	8	208	188	21.6	11.72	661.88	8	44.135	0	High
115	11415026	60S ribosomal protein L18a [Homo sapiens]	47	11	11	121	176	20.7	10.71	320.33	11	34.048	0	High
116	4506609	60S ribosomal protein L19 [Homo sapiens]	27	6	6	121	196	23.5	11.47	383.02	6	48.359	0	High
117	18104948	60S ribosomal protein L21 [Homo sapiens]	35	7	7	129	160	18.6	10.49	421.99	7	51.528	0	High
118	4506613	60S ribosomal protein L22 proprotein [Homo sapiens]	63	7	7	111	128	14.8	9.19	324.73	7	39.733	0	High
119	153791384	60S ribosomal protein L22-like 1 [Homo sapiens]	20	2	2	12	122	14.6	9.38	35.03	2	10.083	0	High
120	4506605	60S ribosomal protein L23 [Homo sapiens]	59	9	9	207	140	14.9	10.51	779.52	9	72.843	0	High
121	17105394	60S ribosomal protein L23a [Homo sapiens]	44	8	8	154	156	17.7	10.45	407.77	8	34.539	0	High
122	4506619	60S ribosomal protein L24 [Homo sapiens]	33	6	6	132	157	17.8	11.25	393.84	6	28.984	0	High
123	4506623	60S ribosomal protein L27 [Homo sapiens]	36	4	4	110	136	15.8	10.56	226.27	4	29.341	0	High
124	4506625	60S ribosomal protein L27a [Homo sapiens]	39	7	7	145	148	16.6	11	413	7	38.321	0	High
125	4506649	60S ribosomal protein L3 isoform a [Homo sapiens]	42	15	15	264	403	46.1	10.18	689.33	15	102.328	0	High
126	4506631	60S ribosomal protein L30 [Homo sapiens]	75	8	8	110	115	12.8	9.63	412.3	8	55.861	0	High
127	4506633	60S ribosomal protein L31 isoform 1 [Homo sapiens]	41	6	6	94	125	14.5	10.54	275.98	6	27.268	0	High
128	55743130	60S ribosomal protein L32 [Homo sapiens]	29	4	4	46	135	15.9	11.33	121.73	4	21.804	0	High
129	6005860	60S ribosomal protein L35 [Homo sapiens]	20	4	4	91	123	14.5	11.05	224.6	4	23.199	0	High
130	16117794	60S ribosomal protein L36 [Homo sapiens]	30	4	4	80	105	12.2	11.59	213.95	4	23.319	0	High
131	4506643	60S ribosomal protein L37a [Homo sapiens]	42	4	4	33	92	10.3	10.43	104.12	4	18.215	0	High
132	4506645	60S ribosomal protein L38 [Homo sapiens]	50	5	5	30	70	8.2	10.1	68.37	5	15.906	0	High
133	16579885	60S ribosomal protein L4 [Homo sapiens]	46	20	20	370	427	47.7	11.06	1020.66	20	135.256	0	High
134	14591909	60S ribosomal protein L5 [Homo sapiens]	44	13	13	181	297	34.3	9.72	511.83	13	86.642	0	High
135	67189747	60S ribosomal protein L6 [Homo sapiens]	45	14	14	234	288	32.7	10.58	605.48	14	86.78	0	High
136	15431301	60S ribosomal protein L7 [Homo sapiens]	53	17	17	252	248	29.2	10.65	644.26	17	93.952	0	High
137	4506661	60S ribosomal protein L7a [Homo sapiens]	53	15	15	318	266	30	10.61	921.01	15	98.159	0	High
138	4506663	60S ribosomal protein L8 [Homo sapiens]	44	11	11	245	257	28	11.03	659.51	11	65.882	0	High
139	7705437	60S ribosome subunit biogenesis protein NIP7 homolog isoform 1 [Homo sapiens]	24	3	3	16	180	20.4	8.51	48.64	3	18.606	0	High
140	40068518	6-phosphogluconate dehydrogenase, decarboxylating [Homo sapiens]	57	25	25	523	483	53.1	7.23	1689.18	25	185.902	0	High
141	6912586	6-phosphogluconolactonase [Homo sapiens]	41	7	7	46	258	27.5	6.05	119.57	7	28.986	0	High
142	16507237	78 kDa glucose-regulated protein precursor [Homo sapiens]	64	49	47	1556	654	72.3	5.16	5519.32	49	443.02	0	High
143	294459996	7-methylguanosine phosphate-specific 5'-nucleotidase [Homo sapiens]	10	3	3	6	300	34.4	6.38	16.67	3	10.858	0	High
144	2YMN	A Chain A, Nucleoprotein	62	36	3	2346	498	56.3	9.31	6977.15	36	422.124	0	High
145	4557237	acetyl-CoA acetyltransferase, mitochondrial precursor [Homo sapiens]	53	14	14	128	427	45.2	8.85	419.29	14	109.735	0	High
146	38679977	acetyl-CoA carboxylase 1 isoform 2 [Homo sapiens]	3	4	4	8	2346	265.4	6.37	12.3	4	14.931	0	High
147	189011546	acid ceramidase isoform b [Homo sapiens]	9	3	3	8	411	46.5	7.85	13.59	3	10.439	0	High
148	5453880	acidic leucine-rich nuclear phosphoprotein 32 family member A [Homo sapiens]	34	11	5	73	249	28.6	4.09	229.33	11	41.397	0	High
149	5454088	acidic leucine-rich nuclear phosphoprotein 32 family member B [Homo sapiens]	26	8	2	74	251	28.8	4.06	230.48	8	43.934	0	High
150	4501867	aconitate hydratase, mitochondrial precursor [Homo sapiens]	39	21	21	151	780	85.4	7.61	504.04	21	99.423	0	High
151	4885049	actin, alpha cardiac muscle 1 proprotein [Homo sapiens]	48	25	3	1877	377	42	5.39	5592.28	25	323.896	0	High
152	4757718	actin-like protein 6A isoform 1 [Homo sapiens]	19	5	5	14	429	47.4	5.6	43.82	5	19.372	0	High
153	5031571	actin-related protein 2 isoform b [Homo sapiens]	42	14	14	131	394	44.7	6.74	422.5	14	118.618	0	High
154	22907052	actin-related protein 2/3 complex subunit 1A isoform 1 [Homo sapiens]	17	4	3	17	370	41.5	8.18	59.52	4	19.264	0	High
155	5031599	actin-related protein 2/3 complex subunit 2 [Homo sapiens]	44	14	14	89	300	34.3	7.36	262.85	14	66.612	0	High
156	514052670	actin-related protein 2/3 complex subunit 3 isoform 1 [Homo sapiens]	29	5	5	46	178	20.5	8.59	116.32	5	25.693	0	High
157	311771647	actin-related protein 2/3 complex subunit 4 isoform c [Homo sapiens]	50	9	9	87	187	21.6	8.59	240.21	9	52.454	0	High
158	5031593	actin-related protein 2/3 complex subunit 5 isoform 1 [Homo sapiens]	22	3	2	52	151	16.3	5.67	160.39	3	16.883	0	High
159	5031573	actin-related protein 3 isoform 1 [Homo sapiens]	62	18	18	159	418	47.3	5.88	457.81	18	95.441	0	High
160	217330646	activated RNA polymerase II transcriptional coactivator p15 [Homo sapiens]	26	3	3	94	127	14.4	9.6	218	3	13.351	0	High
161	6912280	activator of 90 kDa heat shock protein ATPase homolog 1 [Homo sapiens]	43	9	9	42	338	38.3	5.53	119.97	9	44.606	0	High
162	4826852	acyl carrier protein, mitochondrial precursor [Homo sapiens]	15	2	2	18	156	17.4	4.93	51.19	2	8.161	0	High
163	21361497	acyl-CoA dehydrogenase family member 9, mitochondrial [Homo sapiens]	11	6	6	19	621	68.7	7.96	50.79	6	24.167	0	High
164	53759151	acyl-CoA desaturase [Homo sapiens]	12	2	2	20	359	41.5	9	55.59	2	10.222	0	High
165	295849266	acyl-CoA-binding protein isoform 4 [Homo sapiens]	19	2	2	3	148	16.5	9.38	7.46	2	6.824	0	High
166	8923812	acyl-coenzyme A thioesterase 13 isoform 1 [Homo sapiens]	40	3	3	40	140	15	9.14	125.48	3	12.044	0	High
167	148727286	acyl-coenzyme A thioesterase 2, mitochondrial [Homo sapiens]	35	10	10	73	483	53.2	8.47	226.24	10	67.304	0	High
168	81295407	acyl-coenzyme A thioesterase 9, mitochondrial isoform a precursor [Homo sapiens]	33	12	12	58	448	50.8	8.53	119.36	12	44.486	0	High
169	66348062	acylpyruvase FAHD1, mitochondrial isoform 1 [Homo sapiens]	11	2	2	8	248	27.1	7.69	29.03	2	10.789	0	High
170	41327712	adapter molecule crk isoform a [Homo sapiens]	31	6	6	19	304	33.8	5.55	52.13	6	27.319	0	High
171	32484975	adenosine kinase isoform b [Homo sapiens]	17	4	4	12	362	40.5	6.7	30.83	4	16.59	0	High
172	9951915	adenosylhomocysteinase isoform 1 [Homo sapiens]	39	15	15	187	432	47.7	6.34	516.73	15	72.444	0	High
173	4502013	adenylate kinase 2, mitochondrial isoform a [Homo sapiens]	56	11	11	119	239	26.5	7.81	324.44	11	71.261	0	High
174	4557269	adenylosuccinate lyase isoform a [Homo sapiens]	23	6	6	21	484	54.9	7.11	66.33	6	33.777	0	High
175	34577063	adenylosuccinate synthetase isozyme 2 [Homo sapiens]	24	9	9	26	456	50.1	6.55	71.13	9	39.624	0	High
176	5453595	adenylyl cyclase-associated protein 1 [Homo sapiens]	62	21	20	295	475	51.6	8.02	921.17	21	155.403	0	High
177	5453593	adenylyl cyclase-associated protein 2 [Homo sapiens]	6	3	2	21	477	52.8	6.37	39.72	3	6.71	0	High
178	24308201	adipocyte plasma membrane-associated protein [Homo sapiens]	31	8	8	71	416	46.5	6.16	197.92	8	44.941	0	High
179	156071459	ADP/ATP translocase 2 [Homo sapiens]	46	16	4	544	298	32.8	9.69	1389.61	16	69.373	0	High
180	156071462	ADP/ATP translocase 3 [Homo sapiens]	54	16	4	487	298	32.8	9.74	1201.92	16	71.441	0	High
181	4502201	ADP-ribosylation factor 1 [Homo sapiens]	59	10	5	162	181	20.7	6.8	536.94	10	94.348	0	High
182	4502205	ADP-ribosylation factor 4 [Homo sapiens]	48	7	3	96	180	20.5	7.14	297.2	7	68.023	0	High
183	4502209	ADP-ribosylation factor 5 [Homo sapiens]	56	8	3	75	180	20.5	6.79	258.55	8	69.076	0	High
184	4502211	ADP-ribosylation factor 6 [Homo sapiens]	35	4	4	25	175	20.1	8.95	86.93	4	33.279	0	High
185	4502227	ADP-ribosylation factor-like protein 1 [Homo sapiens]	36	4	4	24	181	20.4	5.72	79.99	4	22.707	0	High
186	148612885	ADP-ribosylation factor-like protein 2 isoform 1 [Homo sapiens]	12	2	2	2	184	20.9	6.34	6.55	2	6.624	0	High
187	4757774	ADP-ribosylation factor-like protein 3 [Homo sapiens]	41	5	5	14	182	20.4	7.24	45.31	5	22.495	0	High
188	8922601	ADP-ribosylation factor-like protein 8B [Homo sapiens]	42	6	6	32	186	21.5	8.43	103.91	6	31.744	0	High
189	37594464	ADP-sugar pyrophosphatase [Homo sapiens]	22	4	4	29	219	24.3	4.94	75.67	4	17.594	0	High
190	300192933	AFG3-like protein 2 [Homo sapiens]	10	6	6	10	797	88.5	8.66	23.04	6	16.851	0	High
191	41327764	aflatoxin B1 aldehyde reductase member 2 [Homo sapiens]	9	2	2	16	359	39.6	7.17	58.53	2	12.087	0	High
192	5031579	A-kinase anchor protein 8 [Homo sapiens]	6	2	2	2	692	76.1	5.15	7.76	2	11.697	0	High
193	12962937	aladin isoform 1 [Homo sapiens]	7	3	3	5	546	59.5	7.5	18.09	3	12.415	0	High
194	109148542	alanine--tRNA ligase, cytoplasmic [Homo sapiens]	35	26	26	217	968	106.7	5.53	603.6	26	132.138	0	High
195	320202986	alcohol dehydrogenase [NADP(+)] [Homo sapiens]	30	9	8	51	325	36.6	6.79	138.72	9	46.724	0	High
196	71565154	alcohol dehydrogenase class-3 [Homo sapiens]	12	3	3	26	374	39.7	7.49	71.91	3	23.771	0	High
197	4502043	aldehyde dehydrogenase family 3 member B1 isoform a [Homo sapiens]	7	3	2	43	468	51.8	7.62	120.64	3	17.182	0	High
198	25777730	aldehyde dehydrogenase X, mitochondrial precursor [Homo sapiens]	21	9	7	118	517	57.2	6.99	293.63	9	39.921	0	High
199	206597439	aldehyde dehydrogenase, dimeric NADP-preferring [Homo sapiens]	69	22	21	647	453	50.4	6.54	1909.79	22	186.351	0	High
200	25777732	aldehyde dehydrogenase, mitochondrial isoform 1 precursor [Homo sapiens]	53	21	18	380	517	56.3	7.05	965.33	21	115.357	0	High
201	223468663	aldo-keto reductase family 1 member B10 [Homo sapiens]	83	25	25	938	316	36	7.84	2547.16	25	219.492	0	High
202	4503285	aldo-keto reductase family 1 member C2 isoform 1 [Homo sapiens]	86	23	3	541	323	36.7	7.49	1933.41	23	263.173	0	High
203	24497583	aldo-keto reductase family 1 member C3 isoform 1 [Homo sapiens]	86	23	11	430	323	36.8	7.94	1496.63	23	195.449	0	High
204	20270355	aldose 1-epimerase [Homo sapiens]	7	2	2	3	342	37.7	6.65	3.39	2	6.759	0	High
205	4502049	aldose reductase [Homo sapiens]	70	20	19	396	316	35.8	6.98	956.37	20	137.299	0	High
206	4501993	alkyldihydroxyacetonephosphate synthase, peroxisomal precursor [Homo sapiens]	36	14	14	85	658	72.9	7.34	289.38	14	94.986	0	High
207	203098013	all-trans-retinol 13,14-reductase precursor [Homo sapiens]	7	3	3	9	610	66.8	8.28	29.94	3	13.663	0	High
208	23200008	alpha/beta hydrolase domain-containing protein 11 isoform 1 [Homo sapiens]	13	2	2	5	315	34.7	9.48	14.05	2	10.573	0	High
209	156523970	alpha-2-HS-glycoprotein preproprotein [Homo sapiens]	5	3	3	44	367	39.3	5.72	142.99	3	18.882	0	High
210	4501891	alpha-actinin-1 isoform b [Homo sapiens]	77	62	39	1312	892	103	5.41	4109.29	62	522.275	0	High
211	585866354	alpha-actinin-3 isoform 1 [Homo sapiens]	14	13	2	267	901	103.2	5.52	816.46	13	74.951	0	High
212	12025678	alpha-actinin-4 [Homo sapiens]	81	68	46	2040	911	104.8	5.44	6466.95	68	606.912	0	High
213	319655561	alpha-aminoadipic semialdehyde dehydrogenase isoform 2 [Homo sapiens]	43	14	14	75	511	55.3	6.86	270.29	14	96.17	0	High
214	5031569	alpha-centractin [Homo sapiens]	25	6	4	62	376	42.6	6.64	220.07	6	61.713	0	High
215	4503057	alpha-crystallin B chain [Homo sapiens]	17	3	3	3	175	20.1	7.33	8.5	3	7.357	0	High
216	4503571	alpha-enolase isoform 1 [Homo sapiens]	86	40	35	1366	434	47.1	7.39	4819.17	40	406.243	0	High
217	4501989	alpha-fetoprotein precursor [Homo sapiens]	8	6	6	35	609	68.6	5.68	112.23	6	24.646	0	High
218	4557781	alpha-N-acetylgalactosaminidase precursor [Homo sapiens]	7	2	2	5	411	46.5	5.19	16.36	2	8.489	0	High
219	66346698	alpha-N-acetylglucosaminidase precursor [Homo sapiens]	4	2	2	3	743	82.2	6.65	11.6	2	10.084	0	High
220	315583337	alpha-parvin [Homo sapiens]	11	3	3	7	412	46.6	8.4	23.73	3	21.331	0	High
221	47933379	alpha-soluble NSF attachment protein [Homo sapiens]	27	7	7	34	295	33.2	5.36	104.73	7	27.473	0	High
222	215490011	aminoacyl tRNA synthase complex-interacting multifunctional protein 1 isoform b precursor [Homo sapiens]	25	6	6	33	336	37	8.65	82.57	6	27.56	0	High
223	11125770	aminoacyl tRNA synthase complex-interacting multifunctional protein 2 [Homo sapiens]	22	5	5	45	320	35.3	8.22	125.8	5	27.353	0	High
224	40316915	aminopeptidase B [Homo sapiens]	18	10	10	36	650	72.5	5.74	95.39	10	38.098	0	High
225	4502167	amyloid beta A4 protein isoform a precursor [Homo sapiens]	15	10	9	26	770	86.9	4.82	79.89	10	50.856	0	High
226	4502147	amyloid-like protein 2 isoform 1 precursor [Homo sapiens]	15	9	8	25	763	86.9	4.79	77.78	9	50.465	0	High
227	384367970	ankyrin repeat and FYVE domain-containing protein 1 isoform 3 [Homo sapiens]	8	7	7	21	1211	132.7	6.49	80.83	7	34.292	0	High
228	148664230	ankyrin repeat and LEM domain-containing protein 2 [Homo sapiens]	4	2	2	4	938	104.1	7.09	11.95	2	8.106	0	High
229	4502101	annexin A1 [Homo sapiens]	71	25	25	1074	346	38.7	7.02	3323.82	25	233.565	0	High
230	51896029	annexin A13 isoform b [Homo sapiens]	8	3	2	19	357	39.7	5.5	49.53	3	11.106	0	High
231	50845388	annexin A2 isoform 1 [Homo sapiens]	83	47	47	2064	357	40.4	8.37	6959.83	47	409.913	0	High
232	4826643	annexin A3 [Homo sapiens]	56	14	14	105	323	36.4	5.92	294.88	14	58.373	0	High
233	4502105	annexin A4 [Homo sapiens]	64	19	19	497	321	36.1	6.13	1585.86	19	122.496	0	High
234	4502107	annexin A5 [Homo sapiens]	58	16	16	281	320	35.9	5.05	907.45	16	95.46	0	High
235	71773329	annexin A6 isoform 1 [Homo sapiens]	18	9	9	28	673	75.8	5.6	97.81	9	33.483	0	High
236	4809279	annexin A7 isoform 2 [Homo sapiens]	21	9	9	50	488	52.7	5.68	150.43	9	45.409	0	High
237	411147374	annexin A8 isoform 1 [Homo sapiens]	14	5	5	34	365	40.7	6.04	119.88	5	35.335	0	High
238	5453541	anterior gradient protein 2 homolog precursor [Homo sapiens]	59	7	7	299	175	20	9	1017.28	7	98.265	0	High
239	103472005	antigen KI-67 isoform 1 [Homo sapiens]	5	9	9	33	3256	358.5	9.45	96.59	9	41.487	0	High
240	9665248	antigen peptide transporter 1 isoform 1 [Homo sapiens]	3	2	2	4	808	87.2	8.02	7.07	2	4.604	0.001	High
241	73747915	antigen peptide transporter 2 isoform 1 [Homo sapiens]	7	4	4	16	703	77.6	7.85	37.86	4	12.095	0	High
242	4502261	antithrombin-III precursor [Homo sapiens]	6	3	3	32	464	52.6	6.71	76.51	3	13.807	0	High
243	260436862	AP-1 complex subunit beta-1 isoform a [Homo sapiens]	18	15	4	98	949	104.5	5.06	291.51	15	78.47	0	High
244	71773010	AP-1 complex subunit gamma-1 isoform a [Homo sapiens]	10	7	7	37	825	91.7	6.8	104.13	7	36.51	0	High
245	194473724	AP-1 complex subunit mu-1 isoform 1 [Homo sapiens]	5	2	2	11	435	49.8	7.61	37.56	2	7.197	0	High
246	19913414	AP-2 complex subunit alpha-1 isoform 1 [Homo sapiens]	22	15	10	46	977	107.5	7.03	140.44	15	73.052	0	High
247	338827685	AP-2 complex subunit alpha-2 isoform 1 [Homo sapiens]	14	10	5	37	940	104	6.86	134.59	10	61.149	0	High
248	14917109	AP-2 complex subunit mu isoform a [Homo sapiens]	19	7	7	44	435	49.6	9.54	108.12	7	36.748	0	High
249	32484979	AP-3 complex subunit beta-1 isoform 1 [Homo sapiens]	2	2	2	2	1094	121.2	6.04	5.9	2	8.54	0	High
250	387849337	AP-3 complex subunit delta-1 isoform 3 [Homo sapiens]	3	2	2	5	1215	136.6	7.64	13.6	2	7.794	0	High
251	612149787	apoptosis regulator BAX isoform 1 [Homo sapiens]	31	5	5	18	221	24.3	5.64	73.59	5	25.038	0	High
252	4757732	apoptosis-inducing factor 1, mitochondrial isoform 1 precursor [Homo sapiens]	39	17	17	99	613	66.9	8.95	271.25	17	74.969	0	High
253	7662238	apoptotic chromatin condensation inducer in the nucleus isoform 1 [Homo sapiens]	6	6	6	21	1341	151.8	6.43	61.87	6	30.799	0	High
254	15149476	arginine--tRNA ligase, cytoplasmic [Homo sapiens]	31	16	16	121	660	75.3	6.68	348.19	16	92.822	0	High
255	168229252	asparagine synthetase [glutamine-hydrolyzing] isoform a [Homo sapiens]	30	14	14	97	561	64.3	6.86	264.29	14	53.019	0	High
256	4758762	asparagine--tRNA ligase, cytoplasmic [Homo sapiens]	29	13	13	103	548	62.9	6.25	324.97	13	75.858	0	High
257	4504067	aspartate aminotransferase, cytoplasmic [Homo sapiens]	15	6	6	18	413	46.2	7.01	30.69	6	21.447	0	High
258	73486658	aspartate aminotransferase, mitochondrial isoform 1 precursor [Homo sapiens]	62	22	22	344	430	47.5	9.01	1007.97	22	125.169	0	High
259	45439306	aspartate--tRNA ligase, cytoplasmic isoform 1 [Homo sapiens]	49	20	20	135	501	57.1	6.55	337.88	20	89.761	0	High
260	40789249	aspartate--tRNA ligase, mitochondrial [Homo sapiens]	12	7	7	34	645	73.5	8.02	104.22	7	25.057	0	High
261	7106299	ataxin-10 isoform 1 [Homo sapiens]	8	3	3	9	475	53.5	5.25	29.51	3	11.378	0	High
262	45827806	atlastin-3 isoform 1 [Homo sapiens]	29	9	9	52	541	60.5	5.66	189.84	9	61.644	0	High
263	50345984	ATP synthase subunit alpha, mitochondrial isoform a precursor [Homo sapiens]	59	30	30	698	553	59.7	9.13	2228.44	30	234.141	0	High
264	32189394	ATP synthase subunit beta, mitochondrial precursor [Homo sapiens]	74	29	29	999	529	56.5	5.4	3452.82	29	339.74	0	High
265	5453559	ATP synthase subunit d, mitochondrial isoform a [Homo sapiens]	51	6	6	72	161	18.5	5.3	194.31	6	28.529	0	High
266	4502297	ATP synthase subunit delta, mitochondrial precursor [Homo sapiens]	14	2	2	43	168	17.5	5.49	142.64	2	9.761	0	High
267	6005717	ATP synthase subunit e, mitochondrial [Homo sapiens]	25	2	2	13	69	7.9	9.35	18.43	2	4.949	0.001	High
268	51479156	ATP synthase subunit g, mitochondrial [Homo sapiens]	32	3	3	42	103	11.4	9.64	103.67	3	14.814	0	High
269	50345988	ATP synthase subunit gamma, mitochondrial isoform L (liver) precursor [Homo sapiens]	45	12	12	79	298	33	9.22	222.09	12	61.794	0	High
270	4502303	ATP synthase subunit O, mitochondrial precursor [Homo sapiens]	65	10	10	156	213	23.3	9.96	481.33	10	59.693	0	High
271	51479141	ATP synthase-coupling factor 6, mitochondrial isoform b precursor [Homo sapiens]	38	4	4	35	116	13.4	9.07	111.18	4	26.966	0	High
272	311893396	ATP5J2-PTCD1 fusion protein [Homo sapiens]	3	2	2	12	749	84.1	8.72	39.7	2	7.903	0	High
273	283436220	ATPase family AAA domain-containing protein 3A isoform 1 [Homo sapiens]	8	3	3	14	634	71.3	8.98	57.65	3	22.064	0	High
274	9955963	ATP-binding cassette sub-family B member 6, mitochondrial [Homo sapiens]	2	2	2	3	842	93.8	8.48	8.23	2	5.306	0.001	High
275	4506341	ATP-binding cassette sub-family D member 3 isoform a [Homo sapiens]	7	4	4	22	659	75.4	9.36	71.8	4	15.953	0	High
276	108773784	ATP-binding cassette sub-family E member 1 [Homo sapiens]	29	13	13	35	599	67.3	8.34	95.28	13	53.332	0	High
277	69354671	ATP-binding cassette sub-family F member 1 isoform a [Homo sapiens]	4	3	3	10	845	95.9	6.8	31.86	3	9.802	0	High
278	7242140	ATP-dependent Clp protease ATP-binding subunit clpX-like, mitochondrial precursor [Homo sapiens]	8	4	4	9	633	69.2	7.58	17.93	4	14.73	0	High
279	5174419	ATP-dependent Clp protease proteolytic subunit, mitochondrial precursor [Homo sapiens]	23	4	4	13	277	30.2	8.09	58.26	4	25.873	0	High
280	100913206	ATP-dependent RNA helicase A [Homo sapiens]	51	45	45	449	1270	140.9	6.84	1404.63	45	272.555	0	High
281	4826686	ATP-dependent RNA helicase DDX1 [Homo sapiens]	34	19	19	72	740	82.4	7.23	204.91	19	87.678	0	High
282	38327634	ATP-dependent RNA helicase DDX18 [Homo sapiens]	19	10	10	69	670	75.4	9.5	195.05	10	54.663	0	High
283	9966805	ATP-dependent RNA helicase DDX24 [Homo sapiens]	5	3	3	6	859	96.3	9.06	13.08	3	15.828	0	High
284	21040371	ATP-dependent RNA helicase DDX39A [Homo sapiens]	32	14	3	192	427	49.1	5.68	526.27	14	73.791	0	High
285	87196351	ATP-dependent RNA helicase DDX3X isoform 1 [Homo sapiens]	38	21	20	223	662	73.2	7.18	795.06	21	120.054	0	High
286	13129006	ATP-dependent RNA helicase DDX50 [Homo sapiens]	7	4	2	49	737	82.5	9.17	151.28	4	22.289	0	High
287	164419743	ATP-dependent RNA helicase DDX54 isoform 1 [Homo sapiens]	6	3	3	8	882	98.6	10.02	31.37	3	15.377	0	High
288	4826690	ATP-dependent RNA helicase DHX8 [Homo sapiens]	3	3	2	5	1220	139.2	8.32	12.84	3	10.096	0	High
289	31543667	ATP-dependent RNA helicase SUPV3L1, mitochondrial precursor [Homo sapiens]	5	3	3	6	786	87.9	7.99	17.33	3	12.308	0	High
290	21327685	ATP-dependent zinc metalloprotease YME1L1 isoform 1 [Homo sapiens]	5	2	2	3	773	86.4	8.76	9.52	2	10.942	0	High
291	324120921	atrial natriuretic peptide receptor 3 isoform 1 precursor [Homo sapiens]	3	2	2	7	541	59.8	6.35	18.66	2	6.106	0	High
292	21264565	AT-rich interactive domain-containing protein 1A isoform a [Homo sapiens]	1	2	2	4	2285	241.9	6.7	8.72	2	8.448	0	High
293	56549668	AT-rich interactive domain-containing protein 2 [Homo sapiens]	1	2	2	3	1835	197.3	7.42	6.5	2	4.061	0.001	High
294	4757834	BAG family molecular chaperone regulator 2 [Homo sapiens]	9	2	2	5	211	23.8	6.7	16.55	2	5.183	0.001	High
295	4502389	barrier-to-autointegration factor [Homo sapiens]	48	3	3	69	89	10.1	6.09	213.61	3	22.101	0	High
296	31543106	basal cell adhesion molecule isoform 1 precursor [Homo sapiens]	4	2	2	5	628	67.4	5.81	5.85	2	11.179	0	High
297	333470719	basic leucine zipper and W2 domain-containing protein 1 isoform 2 [Homo sapiens]	31	14	13	92	451	51.2	6.62	252.43	14	47.421	0	High
298	38372919	basigin isoform 1 precursor [Homo sapiens]	15	4	4	13	385	42.2	5.66	37.51	4	19.343	0	High
299	213511508	B-cell receptor-associated protein 31 isoform a [Homo sapiens]	32	10	10	112	313	34.7	7.84	292.67	10	36.018	0	High
300	7661958	bcl-2-associated transcription factor 1 isoform 1 [Homo sapiens]	11	7	6	21	920	106.1	9.98	47.29	7	27.307	0	High
301	398774579	bcl-2-like protein 13 isoform b [Homo sapiens]	10	3	3	7	509	54.4	4.54	19.15	3	13.106	0	High
302	13929462	beta-1,4-galactosyltransferase 1 [Homo sapiens]	4	2	2	10	398	43.9	8.65	22.09	2	6.181	0	High
303	63055057	beta-actin-like protein 2 [Homo sapiens]	28	14	2	899	376	42	5.59	2597.34	14	122.454	0	High
304	297307158	beta-adducin isoform a [Homo sapiens]	4	2	2	5	726	80.8	5.92	21.52	2	13.322	0	High
305	119372308	beta-galactosidase isoform a preproprotein [Homo sapiens]	12	6	6	18	677	76	6.57	60.65	6	26.821	0	High
306	4504373	beta-hexosaminidase subunit beta isoform 1 preproprotein [Homo sapiens]	10	4	4	13	556	63.1	6.76	49.68	4	22.416	0	High
307	7705793	beta-lactamase-like protein 2 [Homo sapiens]	34	6	6	48	288	32.8	6.8	150.51	6	42.339	0	High
308	46094058	bifunctional 3'-phosphoadenosine 5'-phosphosulfate synthase 1 [Homo sapiens]	8	3	2	3	624	70.8	6.86	9.89	3	14.562	0	High
309	62912492	bifunctional 3'-phosphoadenosine 5'-phosphosulfate synthase 2 isoform b [Homo sapiens]	7	3	2	9	619	69.9	8.03	31.35	3	17.021	0	High
310	20149621	bifunctional ATP-dependent dihydroxyacetone kinase/FAD-AMP lyase (cyclizing) [Homo sapiens]	10	3	3	11	575	58.9	7.49	40.26	3	16.358	0	High
311	62241042	bifunctional glutamate/proline--tRNA ligase [Homo sapiens]	30	30	30	157	1512	170.5	7.33	415.02	30	149.424	0	High
312	94721354	bifunctional methylenetetrahydrofolate dehydrogenase/cyclohydrolase, mitochondrial precursor [Homo sapiens]	29	6	6	24	350	37.9	8.73	82.41	6	41.388	0	High
313	31543419	bifunctional polynucleotide phosphatase/kinase [Homo sapiens]	5	2	2	6	521	57	8.46	21.03	2	14.743	0	High
314	20127454	bifunctional purine biosynthesis protein PURH [Homo sapiens]	55	23	23	196	592	64.6	6.71	551.9	23	144.69	0	High
315	190014632	bifunctional UDP-N-acetylglucosamine 2-epimerase/N-acetylmannosamine kinase isoform 1 [Homo sapiens]	3	2	2	3	753	83	6.93	9.6	2	9.191	0	High
316	359465572	biliverdin reductase A precursor [Homo sapiens]	18	5	5	45	296	33.4	6.44	132.45	5	19.554	0	High
317	4557367	bleomycin hydrolase [Homo sapiens]	11	3	3	10	455	52.5	6.27	25.76	3	10.826	0	High
318	409971425	brain acid soluble protein 1 [Homo sapiens]	83	14	14	308	227	22.7	4.63	1035.4	14	130.634	0	High
319	32171238	brain-specific angiogenesis inhibitor 1-associated protein 2-like protein 1 [Homo sapiens]	12	4	4	22	511	56.8	8.68	72.52	4	22.142	0	High
320	7706581	BRCA2 and CDKN1A-interacting protein isoform BCCIPalpha [Homo sapiens]	10	2	2	8	322	36.2	4.69	24.55	2	9.086	0	High
321	51173724	bystin [Homo sapiens]	8	3	3	11	437	49.6	8.12	33.25	3	9.594	0	High
322	222136639	C-1-tetrahydrofolate synthase, cytoplasmic [Homo sapiens]	44	35	35	323	935	101.5	7.3	913.37	35	194.749	0	High
323	18379366	CAAX prenyl protease 1 homolog [Homo sapiens]	9	3	3	10	475	54.8	7.49	25.38	3	12.832	0	High
324	4757960	cadherin-1 preproprotein [Homo sapiens]	4	3	3	7	882	97.4	4.73	12.9	3	8.949	0	High
325	14589889	cadherin-2 preproprotein [Homo sapiens]	7	2	2	2	906	99.7	4.81	7.34	2	9.597	0	High
326	4826673	cadherin-6 preproprotein [Homo sapiens]	3	2	2	3	790	88.3	4.93	9.59	2	6.148	0	High
327	6005731	calcineurin B homologous protein 1 [Homo sapiens]	14	2	2	15	195	22.4	5.1	56.61	2	12.083	0	High
328	119226260	calcium homeostasis endoplasmic reticulum protein [Homo sapiens]	3	2	2	5	916	103.6	9.04	16.59	2	6.031	0	High
329	24308400	calcium uniporter protein, mitochondrial isoform 1 precursor [Homo sapiens]	30	7	7	25	351	39.8	8.65	70.69	7	41.803	0	High
330	22749443	calcium uptake protein 2, mitochondrial [Homo sapiens]	7	2	2	10	434	49.6	9.09	32.43	2	11.64	0	High
331	21361103	calcium-binding mitochondrial carrier protein Aralar1 [Homo sapiens]	16	8	3	26	678	74.7	8.38	71.12	8	35.019	0	High
332	148491091	calcium-binding mitochondrial carrier protein SCaMC-1 isoform 1 [Homo sapiens]	24	9	9	45	477	53.3	6.33	151.48	9	50.762	0	High
333	195927020	calcium-binding protein 39 [Homo sapiens]	18	6	4	16	341	39.8	6.89	39.18	6	18.869	0	High
334	565324223	calcium-binding protein 39-like [Homo sapiens]	12	4	2	11	337	39.1	8.4	32.16	4	12.669	0	High
335	7656952	calcyclin-binding protein isoform 1 [Homo sapiens]	56	11	11	129	228	26.2	8.25	428.72	11	100.464	0	High
336	44680105	caldesmon isoform 1 [Homo sapiens]	13	7	7	41	793	93.2	5.66	89.36	7	43.487	0	High
337	10716563	calnexin precursor [Homo sapiens]	52	25	25	450	592	67.5	4.6	1460.94	25	144.216	0	High
338	12408656	calpain-1 catalytic subunit [Homo sapiens]	20	12	12	57	714	81.8	5.67	176.9	12	45.963	0	High
339	157389005	calpain-2 catalytic subunit isoform 1 [Homo sapiens]	17	9	9	84	700	80	4.98	275.36	9	57.714	0	High
340	4758018	calponin-2 isoform a [Homo sapiens]	39	7	6	40	309	33.7	7.33	109.47	7	28.832	0	High
341	4502923	calponin-3 isoform 1 [Homo sapiens]	17	4	3	34	329	36.4	6.05	93.59	4	23.455	0	High
342	4757900	calreticulin precursor [Homo sapiens]	55	16	16	286	417	48.1	4.44	973.16	16	109.547	0	High
343	57242757	calsyntenin-1 isoform 1 precursor [Homo sapiens]	8	8	8	16	981	109.7	4.91	43.29	8	34.602	0	High
344	314122177	calumenin isoform c precursor [Homo sapiens]	34	11	11	83	323	38	4.63	233.92	11	54.054	0	High
345	4758958	cAMP-dependent protein kinase type II-alpha regulatory subunit [Homo sapiens]	5	2	2	4	404	45.5	5.07	4.86	2	5.845	0	High
346	4557481	canalicular multispecific organic anion transporter 1 [Homo sapiens]	9	8	8	27	1545	174.1	8.32	89.3	8	47.443	0	High
347	9955970	canalicular multispecific organic anion transporter 2 isoform 1 [Homo sapiens]	7	8	7	23	1527	169.2	7.2	64.66	8	30.043	0	High
348	14150100	cancer-related nucleoside-triphosphatase [Homo sapiens]	17	2	2	12	190	20.7	9.54	39.93	2	15.677	0	High
349	42558250	caprin-1 isoform 1 [Homo sapiens]	12	6	6	54	709	78.3	5.25	162.85	6	30.754	0	High
350	169790915	carbamoyl-phosphate synthase [ammonia], mitochondrial isoform a precursor [Homo sapiens]	34	31	31	230	1506	165.5	6.79	688.61	31	199.859	0	High
351	192447432	carbonic anhydrase 1 isoform a [Homo sapiens]	50	14	14	79	261	28.9	7.12	258.85	14	138.748	0	High
352	4502515	carbonic anhydrase 12 isoform 1 precursor [Homo sapiens]	35	8	8	51	354	39.4	7.23	153.5	8	53.545	0	High
353	4502599	carbonyl reductase [NADPH] 1 isoform 1 [Homo sapiens]	53	10	8	103	277	30.4	8.32	364.49	10	69.664	0	High
354	4502601	carbonyl reductase [NADPH] 3 [Homo sapiens]	19	4	2	38	277	30.8	6.18	132.64	4	23.46	0	High
355	40254992	carbonyl reductase family member 4 [Homo sapiens]	14	2	2	6	237	25.3	9.33	23.46	2	12.222	0	High
356	20270371	carboxymethylenebutenolidase homolog [Homo sapiens]	8	2	2	2	245	28	7.18	5.54	2	4.757	0.001	High
357	22202611	carboxypeptidase D isoform 1 precursor [Homo sapiens]	3	4	4	8	1380	152.8	6.05	20.5	4	15.078	0	High
358	38327526	carboxypeptidase M precursor [Homo sapiens]	4	2	2	3	443	50.5	7.36	5.04	2	4.527	0.001	High
359	4503023	carnitine O-palmitoyltransferase 2, mitochondrial precursor [Homo sapiens]	4	2	2	4	658	73.7	8.18	10.34	2	7.254	0	High
360	68303572	casein kinase I isoform alpha isoform 2 [Homo sapiens]	7	2	2	7	337	38.9	9.57	21.3	2	9.23	0	High
361	4503095	casein kinase II subunit alpha isoform a [Homo sapiens]	25	8	8	33	391	45.1	7.74	97.7	8	34.798	0	High
362	23503295	casein kinase II subunit beta isoform 1 [Homo sapiens]	23	3	3	14	215	24.9	5.55	43.28	3	20.846	0	High
363	14861834	cat eye syndrome critical region protein 5 isoform 2 precursor [Homo sapiens]	16	3	3	11	423	46.3	8.13	41.78	3	23.504	0	High
364	4557014	catalase [Homo sapiens]	19	7	7	30	527	59.7	7.39	101.39	7	43.898	0	High
365	205830451	catechol O-methyltransferase isoform MB-COMT [Homo sapiens]	32	7	7	37	271	30	5.47	120.22	7	43.95	0	High
366	543583729	catenin alpha-2 isoform 3 [Homo sapiens]	12	8	2	41	953	105.2	5.71	114.35	8	37.057	0	High
367	148227672	catenin beta-1 [Homo sapiens]	31	17	11	75	781	85.4	5.86	213.98	17	67.388	0	High
368	146231940	catenin delta-1 isoform 1ABC [Homo sapiens]	28	19	19	79	968	108.1	6.23	254.13	19	117.15	0	High
369	22538437	cathepsin B preproprotein [Homo sapiens]	16	5	5	32	339	37.8	6.3	66.32	5	13.062	0	High
370	4503143	cathepsin D preproprotein [Homo sapiens]	50	16	16	357	412	44.5	6.54	1092.99	16	149.739	0	High
371	22538442	cathepsin Z preproprotein [Homo sapiens]	11	3	3	35	303	33.8	7.11	94.67	3	11.232	0	High
372	4505061	cation-dependent mannose-6-phosphate receptor isoform 1 precursor [Homo sapiens]	25	5	5	28	277	31	5.83	68.87	5	21.952	0	High
373	15451856	caveolin-1 isoform alpha [Homo sapiens]	62	9	9	64	178	20.5	6.02	190.06	9	47.503	0	High
374	42542392	CCAAT/enhancer-binding protein zeta [Homo sapiens]	7	5	5	15	1054	120.9	5.94	50.84	5	29.421	0	High
375	42716275	CCR4-NOT transcription complex subunit 1 isoform a [Homo sapiens]	4	6	6	14	2376	266.8	7.11	39.35	6	27.054	0	High
376	21237751	CD151 antigen [Homo sapiens]	8	2	2	16	253	28.3	7.47	39	2	5.211	0.001	High
377	68163411	CD166 antigen isoform 1 precursor [Homo sapiens]	39	15	15	94	583	65.1	6.25	278.65	15	98.109	0	High
378	11321634	CD2-associated protein [Homo sapiens]	7	4	4	15	639	71.4	6.4	41.53	4	16.528	0	High
379	4757944	CD81 antigen isoform 1 [Homo sapiens]	15	2	2	19	236	25.8	5.29	60.01	2	25.181	0	High
380	56605994	CDGSH iron-sulfur domain-containing protein 2 [Homo sapiens]	36	4	4	24	135	15.3	9.61	68.69	4	14.586	0	High
381	24432106	cell cycle and apoptosis regulator protein 2 [Homo sapiens]	24	15	15	115	923	102.8	5.22	319.74	15	93.804	0	High
382	4885579	cell differentiation protein RCD1 homolog isoform 2 [Homo sapiens]	10	2	2	12	299	33.6	8.03	36.25	2	16.894	0	High
383	89903012	cell division control protein 42 homolog isoform 1 precursor [Homo sapiens]	42	7	6	87	191	21.2	6.55	262.17	7	38.406	0	High
384	11067747	cell division cycle 5-like protein [Homo sapiens]	17	9	9	48	802	92.2	8.18	144.29	9	48.379	0	High
385	46852388	cell division cycle and apoptosis regulator protein 1 isoform a [Homo sapiens]	5	3	3	9	1150	132.7	5.76	35.71	3	15.082	0	High
386	221316620	cell division cycle protein 123 homolog [Homo sapiens]	7	2	2	4	336	39.1	4.81	10.73	2	6.257	0	High
387	167466177	cell division cycle protein 27 homolog isoform 1 [Homo sapiens]	5	3	3	4	830	92.6	7.12	7.88	3	8.642	0	High
388	187608726	cellular nucleic acid-binding protein isoform 1 [Homo sapiens]	13	2	2	2	179	19.7	7.58	7.25	2	7.538	0	High
389	4759344	centromere/kinetochore protein zw10 homolog [Homo sapiens]	5	3	3	6	779	88.8	6.27	16.97	3	12.357	0	High
390	28827795	charged multivesicular body protein 4b [Homo sapiens]	18	2	2	16	224	24.9	4.82	55.87	2	11.995	0	High
391	189409150	charged multivesicular body protein 5 isoform 1 [Homo sapiens]	15	2	2	8	219	24.6	4.83	17.59	2	9.804	0	High
392	41350216	chitobiosyldiphosphodolichol beta-mannosyltransferase [Homo sapiens]	11	3	3	15	464	52.5	7.23	66.55	3	25.648	0	High
393	567757609	chloride intracellular channel protein 1 [Homo sapiens]	61	14	14	261	241	26.9	5.17	900.75	14	110.125	0	High
394	7330335	chloride intracellular channel protein 4 [Homo sapiens]	49	9	9	66	253	28.8	5.59	200.69	9	67.423	0	High
395	15082258	chromobox protein homolog 3 [Homo sapiens]	45	6	6	55	183	20.8	5.33	179.69	6	35.885	0	High
396	6912292	chromobox protein homolog 5 [Homo sapiens]	35	6	6	26	191	22.2	5.86	62.87	6	20.737	0	High
397	116686122	chromosome-associated kinesin KIF4A [Homo sapiens]	1	2	2	5	1232	139.8	6.27	15.51	2	6.553	0	High
398	186928847	cirhin [Homo sapiens]	3	2	2	3	686	76.8	8.85	9.79	2	8.051	0	High
399	38327625	citrate synthase, mitochondrial precursor [Homo sapiens]	35	13	13	190	466	51.7	8.32	469.26	13	57.789	0	High
400	307078123	clathrin interactor 1 isoform 1 [Homo sapiens]	9	4	4	13	643	70.3	6.58	33.45	4	14.44	0	High
401	4502899	clathrin light chain A isoform a [Homo sapiens]	25	5	5	65	218	23.6	4.53	136.61	5	24.655	0	High
402	56676371	cleavage and polyadenylation specificity factor subunit 1 [Homo sapiens]	5	6	6	15	1443	160.8	6.4	41.21	6	28.372	0	High
403	5901926	cleavage and polyadenylation specificity factor subunit 5 [Homo sapiens]	39	8	8	78	227	26.2	8.82	257.68	8	49.989	0	High
404	4557493	cleavage stimulation factor subunit 2 [Homo sapiens]	15	5	5	17	577	60.9	6.83	45	5	25.062	0	High
405	4557495	cleavage stimulation factor subunit 3 isoform 1 [Homo sapiens]	6	2	2	14	717	82.9	8.12	44.32	2	17.1	0	High
406	4502897	cleft lip and palate transmembrane protein 1 isoform 2 [Homo sapiens]	13	6	6	26	669	76	6.3	97.07	6	32.611	0	High
407	21624607	coactosin-like protein [Homo sapiens]	49	6	6	67	142	15.9	5.67	118.3	6	19.179	0	High
408	148536853	coatomer subunit alpha isoform 2 [Homo sapiens]	27	24	24	110	1224	138.3	7.66	336.74	24	114.857	0	High
409	221316632	coatomer subunit beta [Homo sapiens]	25	17	17	95	953	107.1	6.05	296.87	17	81.363	0	High
410	4758032	coatomer subunit beta' [Homo sapiens]	16	11	11	48	906	102.4	5.27	159.18	11	47.607	0	High
411	11863154	coatomer subunit delta isoform 1 [Homo sapiens]	24	10	10	63	511	57.2	6.21	182.32	10	48.043	0	High
412	31542319	coatomer subunit epsilon isoform a [Homo sapiens]	7	2	2	3	308	34.5	5.12	10.3	2	7.082	0	High
413	11559929	coatomer subunit gamma-1 [Homo sapiens]	31	19	16	81	874	97.7	5.47	265.36	19	102.412	0	High
414	414144870	coatomer subunit zeta-1 isoform 4 [Homo sapiens]	26	4	4	31	185	21.1	4.88	131.01	4	24.518	0	High
415	16418349	cob(I)yrinic acid a,c-diamide adenosyltransferase, mitochondrial precursor [Homo sapiens]	10	2	2	5	250	27.4	8.6	13.24	2	8.601	0	High
416	5031635	cofilin-1 [Homo sapiens]	85	18	11	326	166	18.5	8.09	1179.57	18	118.33	0	High
417	33946278	cofilin-2 isoform 1 [Homo sapiens]	64	11	4	153	166	18.7	7.88	504.32	11	66.947	0	High
418	19923969	coiled-coil domain-containing protein 124 [Homo sapiens]	10	2	2	4	223	25.8	9.54	11.79	2	6.374	0	High
419	108936950	coiled-coil domain-containing protein 25 [Homo sapiens]	14	3	3	3	208	24.5	6.8	7.94	3	6.783	0	High
420	171906582	coiled-coil domain-containing protein 47 precursor [Homo sapiens]	8	3	3	21	483	55.8	4.87	66.41	3	19.79	0	High
421	62988355	coiled-coil domain-containing protein 58 [Homo sapiens]	24	3	3	6	144	16.6	7.81	14.34	3	8.742	0	High
422	7705851	coiled-coil-helix-coiled-coil-helix domain-containing protein 2, mitochondrial precursor [Homo sapiens]	34	3	3	13	151	15.5	9.22	31.6	3	18.825	0	High
423	8923390	coiled-coil-helix-coiled-coil-helix domain-containing protein 3, mitochondrial precursor [Homo sapiens]	28	6	6	70	227	26.1	8.28	193.48	6	29.251	0	High
424	338968930	cold shock domain-containing protein E1 isoform 4 [Homo sapiens]	10	7	7	31	844	93.7	6.52	84.79	7	29.807	0	High
425	93141047	collagen alpha-1(XII) chain long isoform precursor [Homo sapiens]	8	20	20	53	3063	332.9	5.53	157.15	20	83.776	0	High
426	110611235	collagen alpha-1(XVIII) chain isoform 1 precursor [Homo sapiens]	2	2	2	7	1516	153.7	5.68	25.83	2	12.249	0	High
427	89363017	collagen alpha-2(V) chain preproprotein [Homo sapiens]	7	7	7	48	1499	144.8	6.46	143.31	7	55.325	0	High
428	45545435	COMM domain-containing protein 2 [Homo sapiens]	16	2	2	4	199	22.7	6.73	7.59	2	8.844	0	High
429	4502491	complement component 1 Q subcomponent-binding protein, mitochondrial precursor [Homo sapiens]	51	8	8	125	282	31.3	4.84	495.49	8	61.816	0	High
430	178056552	condensin complex subunit 1 [Homo sapiens]	7	6	6	9	1401	157.1	6.61	20.49	6	19.376	0	High
431	25121987	condensin complex subunit 2 isoform 1 [Homo sapiens]	5	2	2	3	741	82.5	5.06	6.2	2	8.892	0	High
432	21359945	condensin complex subunit 3 [Homo sapiens]	2	2	2	5	1015	114.3	5.59	11.92	2	8.624	0	High
433	39652628	constitutive coactivator of PPAR-gamma-like protein 1 isoform a [Homo sapiens]	4	3	3	7	1118	121.8	8.88	19.33	3	14.165	0	High
434	28373117	contactin-1 isoform 1 precursor [Homo sapiens]	13	9	9	34	1018	113.2	5.9	102.39	9	44.13	0	High
435	219842262	COP9 signalosome complex subunit 2 isoform 2 [Homo sapiens]	11	3	3	8	450	52.4	5.47	25.49	3	16.723	0	High
436	23238222	COP9 signalosome complex subunit 3 isoform 1 [Homo sapiens]	9	3	3	10	423	47.8	6.65	28.36	3	12.776	0	High
437	38373690	COP9 signalosome complex subunit 4 isoform 1 [Homo sapiens]	26	7	7	22	406	46.2	5.83	72.65	7	36.59	0	High
438	38027923	COP9 signalosome complex subunit 5 [Homo sapiens]	16	4	4	12	334	37.6	6.54	26.73	4	21.114	0	High
439	34147637	COP9 signalosome complex subunit 6 [Homo sapiens]	6	2	2	2	327	36.1	5.73	3.86	2	5.571	0.001	High
440	7705330	COP9 signalosome complex subunit 7a [Homo sapiens]	9	2	2	7	275	30.3	8.22	22.61	2	7.674	0	High
441	5729779	COP9 signalosome complex subunit 8 isoform 1 [Homo sapiens]	30	4	4	23	209	23.2	5.38	84.14	4	29.991	0	High
442	197333761	copine-1 isoform b [Homo sapiens]	12	5	5	30	542	59.7	6.04	78.17	5	21.274	0	High
443	4503015	copine-3 [Homo sapiens]	20	9	8	52	537	60.1	5.85	148.51	9	38.652	0	High
444	93141018	core histone macro-H2A.1 isoform 3 [Homo sapiens]	59	14	12	225	372	39.6	9.79	739.77	14	121.735	0	High
445	8923920	core histone macro-H2A.2 [Homo sapiens]	19	5	3	50	372	40	9.69	155.22	5	32.044	0	High
446	13124873	core-binding factor subunit beta isoform 2 [Homo sapiens]	14	2	2	2	182	21.5	6.6	4.89	2	9.144	0	High
447	319918873	CORO7-PAM16 protein [Homo sapiens]	3	2	2	10	1048	114.1	6.33	35.75	2	16.888	0	High
448	14149734	coronin-1B [Homo sapiens]	8	5	5	17	489	54.2	5.88	44.44	5	22.512	0	High
449	157412328	coronin-1C isoform a [Homo sapiens]	26	13	12	95	527	58.9	7.75	271.11	13	55.234	0	High
450	21536286	creatine kinase B-type [Homo sapiens]	46	12	12	92	381	42.6	5.59	358.07	12	112.356	0	High
451	4885153	crk-like protein [Homo sapiens]	9	2	2	6	303	33.8	6.74	20.9	2	10.656	0	High
452	145580575	C-terminal-binding protein 2 isoform 2 [Homo sapiens]	5	3	2	10	985	106.1	8.02	27.8	3	14.867	0	High
453	311771639	cullin-2 isoform a [Homo sapiens]	5	3	3	8	764	89.4	7.11	22.02	3	9.677	0	High
454	21361794	cullin-associated NEDD8-dissociated protein 1 [Homo sapiens]	28	26	26	177	1230	136.3	5.78	538.5	26	146.529	0	High
455	4503117	cystatin-B [Homo sapiens]	70	4	4	41	98	11.1	7.56	137.78	4	28.065	0	High
456	568599832	cystatin-C precursor [Homo sapiens]	17	2	2	16	146	15.8	8.75	59.06	2	9.508	0	High
457	302191615	cysteine and glycine-rich protein 1 isoform 1 [Homo sapiens]	43	7	7	58	193	20.6	8.57	156.73	7	34.122	0	High
458	221316566	cysteine and histidine-rich domain-containing protein 1 isoform a [Homo sapiens]	9	2	2	7	332	37.5	7.87	14.23	2	11.109	0	High
459	4503047	cysteine-rich protein 1 [Homo sapiens]	57	3	3	45	77	8.5	8.75	102.11	3	16.432	0	High
460	399498490	cysteine-rich protein 2 isoform 2 [Homo sapiens]	12	2	2	7	282	30.2	8.22	17.62	2	8.406	0	High
461	62240992	cysteine--tRNA ligase, cytoplasmic isoform c [Homo sapiens]	17	12	12	51	831	94.6	6.83	120.8	12	57.478	0	High
462	7657683	cystine/glutamate transporter [Homo sapiens]	7	3	3	7	501	55.4	9.19	21.4	3	10.521	0	High
463	41281768	cytochrome b5 isoform 1 [Homo sapiens]	39	4	4	25	134	15.3	4.96	71.26	4	24.393	0	High
464	83921614	cytochrome b5 type B [Homo sapiens]	57	6	6	30	150	16.7	4.97	102.27	6	34.608	0	High
465	46593007	cytochrome b-c1 complex subunit 1, mitochondrial precursor [Homo sapiens]	38	13	13	141	480	52.6	6.37	431.73	13	96.51	0	High
466	50592988	cytochrome b-c1 complex subunit 2, mitochondrial precursor [Homo sapiens]	54	15	15	166	453	48.4	8.63	540.91	15	102.073	0	High
467	83627705	cytochrome b-c1 complex subunit 6, mitochondrial isoform 1 precursor [Homo sapiens]	36	2	2	9	91	10.7	4.44	23.46	2	7.515	0	High
468	5454152	cytochrome b-c1 complex subunit 7 isoform 1 [Homo sapiens]	31	3	3	18	111	13.5	8.78	51.08	3	13.855	0	High
469	41281885	cytochrome b-c1 complex subunit 9 isoform a [Homo sapiens]	38	2	2	7	63	7.3	9.47	14.91	2	7.761	0	High
470	163644321	cytochrome b-c1 complex subunit Rieske, mitochondrial [Homo sapiens]	30	5	5	34	274	29.6	8.32	120.09	5	36.42	0	High
471	11128019	cytochrome c [Homo sapiens]	54	5	5	76	105	11.7	9.57	200.21	5	24.239	0	High
472	4502981	cytochrome c oxidase subunit 4 isoform 1, mitochondrial precursor [Homo sapiens]	31	5	5	72	169	19.6	9.51	165.81	5	20.561	0	High
473	190885499	cytochrome c oxidase subunit 5A, mitochondrial precursor [Homo sapiens]	32	4	4	36	150	16.8	6.79	100.46	4	19.373	0	High
474	17017988	cytochrome c oxidase subunit 5B, mitochondrial precursor [Homo sapiens]	40	5	5	51	129	13.7	8.81	100.74	5	20.639	0	High
475	4502985	cytochrome c oxidase subunit 6B1 [Homo sapiens]	30	2	2	19	86	10.2	7.05	66.17	2	17.157	0	High
476	4758040	cytochrome c oxidase subunit 6C proprotein [Homo sapiens]	20	2	2	17	75	8.8	10.39	33.88	2	4.818	0.001	High
477	262118227	cytochrome c oxidase subunit 7A2, mitochondrial precursor [Homo sapiens]	20	2	2	45	115	12.8	9.13	146.36	2	9.351	0	High
478	18105037	cytochrome c oxidase subunit 7A-related protein, mitochondrial [Homo sapiens]	40	2	2	14	114	12.6	9.42	56.58	2	14.822	0	High
479	251831110	cytochrome c oxidase subunit II (mitochondrion) [Homo sapiens]	28	5	5	98	227	25.5	4.82	276.88	5	34.645	0	High
480	21359867	cytochrome c1, heme protein, mitochondrial precursor [Homo sapiens]	20	5	5	36	325	35.4	9	88.89	5	20.995	0	High
481	13449277	cytochrome P450 2S1 precursor [Homo sapiens]	5	2	2	2	504	55.8	8.62	2	2	8.876	0	High
482	193083178	cytochrome P450 4F11 precursor [Homo sapiens]	8	3	3	18	524	60.1	6.73	74.08	3	15.155	0	High
483	33350932	cytoplasmic dynein 1 heavy chain 1 [Homo sapiens]	18	65	65	287	4646	532.1	6.4	791.45	65	312.751	0	High
484	166795297	cytoplasmic dynein 1 light intermediate chain 1 [Homo sapiens]	10	3	3	6	523	56.5	6.42	20.31	3	12.253	0	High
485	5453634	cytoplasmic dynein 1 light intermediate chain 2 isoform 1 [Homo sapiens]	13	4	4	7	492	54.1	6.38	20.48	4	19.295	0	High
486	568214361	cytoplasmic FMR1-interacting protein 1 isoform a [Homo sapiens]	3	3	3	8	1253	145.1	6.9	30.43	3	14.195	0	High
487	19920317	cytoskeleton-associated protein 4 [Homo sapiens]	55	27	27	283	602	66	5.92	874.58	27	151.159	0	High
488	57164942	cytoskeleton-associated protein 5 isoform a [Homo sapiens]	3	4	4	23	2032	225.4	7.8	59.95	4	17.657	0	High
489	41393561	cytosol aminopeptidase [Homo sapiens]	30	11	11	63	519	56.1	7.93	211.18	11	78.356	0	High
490	393195306	cytosolic 10-formyltetrahydrofolate dehydrogenase isoform 1 [Homo sapiens]	4	3	2	8	912	99.7	5.94	18.35	3	10.909	0	High
491	32528282	cytosolic acyl coenzyme A thioester hydrolase isoform hBACHb [Homo sapiens]	18	6	6	27	380	41.8	8.54	79.87	6	22.821	0	High
492	23943920	cytosolic phospholipase A2 [Homo sapiens]	5	3	3	11	749	85.2	5.38	18.17	3	12.371	0	High
493	23308577	D-3-phosphoglycerate dehydrogenase [Homo sapiens]	28	15	15	152	533	56.6	6.71	468.54	15	71.442	0	High
494	25470886	DAZ-associated protein 1 isoform b [Homo sapiens]	11	3	3	19	407	43.4	8.56	81.01	3	19.644	0	High
495	36030883	DCN1-like protein 1 [Homo sapiens]	14	3	3	8	259	30.1	5.34	28.2	3	11.165	0	High
496	13129100	dCTP pyrophosphatase 1 [Homo sapiens]	55	5	5	18	170	18.7	5.03	49.95	5	23.232	0	High
497	301129170	death-inducer obliterator 1 isoform c [Homo sapiens]	2	3	3	3	2240	243.7	7.88	9.65	3	11.033	0	High
498	33667109	dehydrogenase/reductase SDR family member 2, mitochondrial isoform 1 [Homo sapiens]	6	2	2	16	300	31.5	9.95	35.97	2	4.486	0.001	High
499	32483357	dehydrogenase/reductase SDR family member 4 isoform 1 [Homo sapiens]	27	5	5	22	278	29.5	8.56	74.33	5	25.77	0	High
500	70995211	delta(3,5)-Delta(2,4)-dienoyl-CoA isomerase, mitochondrial precursor [Homo sapiens]	57	14	14	112	328	35.8	8	389.2	14	77.507	0	High
501	27501446	density-regulated protein [Homo sapiens]	20	3	3	17	198	22.1	5.3	57.93	3	22.736	0	High
502	38016914	deoxynucleoside triphosphate triphosphohydrolase SAMHD1 [Homo sapiens]	15	6	6	26	626	72.2	7.14	78.42	6	54.799	0	High
503	13236516	derlin-1 isoform a [Homo sapiens]	10	2	2	7	251	28.8	9.51	18.44	2	7.203	0	High
504	13435364	desmocollin-2 isoform Dsc2a preproprotein [Homo sapiens]	5	4	4	21	901	99.9	5.34	58.64	4	19.711	0	High
505	148539846	desmocollin-3 isoform Dsc3a preproprotein [Homo sapiens]	6	5	5	17	896	99.9	6.1	55.03	5	29.169	0	High
506	116534898	desmoglein-2 preproprotein [Homo sapiens]	9	6	6	30	1118	122.2	5.24	81.89	6	32.937	0	High
507	119964718	desmoglein-3 preproprotein [Homo sapiens]	2	2	2	30	999	107.5	5	110.88	2	13.896	0	High
508	58530840	desmoplakin isoform I [Homo sapiens]	15	31	31	130	2871	331.6	6.81	480.15	31	167.487	0	High
509	5802966	destrin isoform a [Homo sapiens]	71	11	9	66	165	18.5	7.85	212.3	11	52.113	0	High
510	4758796	developmentally-regulated GTP-binding protein 1 [Homo sapiens]	27	7	7	29	367	40.5	8.9	89.51	7	35.105	0	High
511	9845297	diablo homolog, mitochondrial isoform 1 precursor [Homo sapiens]	8	2	2	23	239	27.1	5.9	73.64	2	9.05	0	High
512	7110719	dickkopf-related protein 1 precursor [Homo sapiens]	8	2	2	3	266	28.7	8.4	6.66	2	5.207	0.001	High
513	75677335	digestive organ expansion factor homolog [Homo sapiens]	2	2	2	4	756	87	5.88	9.44	2	4.858	0.001	High
514	4503323	dihydrofolate reductase isoform 1 [Homo sapiens]	12	2	2	12	187	21.4	7.42	27.66	2	8.407	0	High
515	91199540	dihydrolipoyl dehydrogenase, mitochondrial isoform 1 precursor [Homo sapiens]	36	14	14	118	509	54.1	7.85	380.77	14	83.668	0	High
516	31711992	dihydrolipoyllysine-residue acetyltransferase component of pyruvate dehydrogenase complex, mitochondrial precursor [Homo sapiens]	28	11	11	72	647	69	7.84	238.6	11	68.457	0	High
517	19923748	dihydrolipoyllysine-residue succinyltransferase component of 2-oxoglutarate dehydrogenase complex, mitochondrial isoform 1 precursor [Homo sapiens]	31	11	11	146	453	48.7	8.95	420.24	11	71.237	0	High
518	208973246	dihydropteridine reductase [Homo sapiens]	40	6	6	25	244	25.8	7.37	71.89	6	40.689	0	High
519	308818195	dihydropyrimidinase-related protein 2 isoform 1 [Homo sapiens]	35	15	14	180	677	73.5	6.35	496.61	15	99.26	0	High
520	308818200	dihydropyrimidinase-related protein 3 isoform 1 [Homo sapiens]	13	7	6	48	684	73.9	6.35	127.08	7	31.89	0	High
521	189083844	dipeptidyl peptidase 1 isoform a preproprotein [Homo sapiens]	16	4	4	20	463	51.8	6.99	62.31	4	28.961	0	High
522	18491024	dipeptidyl peptidase 3 isoform 1 [Homo sapiens]	11	5	5	19	737	82.5	5.1	58.3	5	33.095	0	High
523	54792129	discoidin, CUB and LCCL domain-containing protein 2 precursor [Homo sapiens]	6	2	2	3	775	85	7.17	11.27	2	12.744	0	High
524	4557251	disintegrin and metalloproteinase domain-containing protein 10 precursor [Homo sapiens]	10	5	5	7	748	84.1	7.77	19.98	5	25.327	0	High
525	148529014	DNA damage-binding protein 1 [Homo sapiens]	20	17	17	69	1140	126.9	5.26	178.79	17	75.106	0	High
526	4557515	DNA damage-binding protein 2 [Homo sapiens]	9	2	2	6	427	47.8	9.47	18.45	2	10.867	0	High
527	4557719	DNA ligase 1 isoform 1 [Homo sapiens]	3	2	2	3	919	101.7	5.62	2.39	2	8.36	0	High
528	4557757	DNA mismatch repair protein Mlh1 isoform 1 [Homo sapiens]	4	2	2	5	756	84.5	5.72	10.95	2	7.138	0	High
529	4557761	DNA mismatch repair protein Msh2 isoform 1 [Homo sapiens]	8	5	5	13	934	104.7	5.77	15.9	5	18.696	0	High
530	4504191	DNA mismatch repair protein Msh6 isoform 1 [Homo sapiens]	9	9	9	41	1360	152.7	6.9	123.42	9	51.687	0	High
531	19924129	DNA repair protein RAD50 [Homo sapiens]	3	4	4	7	1312	153.8	6.89	14.84	4	12.918	0	High
532	33356547	DNA replication licensing factor MCM2 [Homo sapiens]	23	15	15	107	904	101.8	5.52	353.02	15	86.926	0	High
533	394582093	DNA replication licensing factor MCM3 isoform 1 [Homo sapiens]	18	12	12	57	853	95.8	5.77	157.97	12	54.106	0	High
534	33469919	DNA replication licensing factor MCM4 [Homo sapiens]	15	11	11	60	863	96.5	6.74	177.36	11	42.527	0	High
535	23510448	DNA replication licensing factor MCM5 [Homo sapiens]	25	15	15	75	734	82.2	8.37	204.77	15	74.19	0	High
536	7427519	DNA replication licensing factor MCM6 [Homo sapiens]	22	14	14	59	821	92.8	5.41	173.4	14	62.642	0	High
537	33469968	DNA replication licensing factor MCM7 isoform 1 [Homo sapiens]	29	15	15	90	719	81.3	6.46	329.35	15	90.114	0	High
538	11225260	DNA topoisomerase 1 [Homo sapiens]	16	9	9	53	765	90.7	9.31	155.97	9	32.36	0	High
539	19913406	DNA topoisomerase 2-alpha [Homo sapiens]	19	22	15	95	1531	174.3	8.72	270.79	22	90.468	0	High
540	346644849	DNA-(apurinic or apyrimidinic site) lyase [Homo sapiens]	56	12	12	77	318	35.5	8.12	258.45	12	77.507	0	High
541	13654237	DNA-dependent protein kinase catalytic subunit isoform 1 [Homo sapiens]	36	116	116	926	4128	468.8	7.12	2792.98	116	657.748	0	High
542	662236821	DNA-directed RNA polymerase I subunit RPA34 isoform 1 [Homo sapiens]	31	6	6	16	512	55.1	8.37	54.57	6	31.785	0	High
543	4505939	DNA-directed RNA polymerase II subunit RPB1 [Homo sapiens]	2	2	2	4	1970	217.1	7.37	13.8	2	10.839	0	High
544	4505941	DNA-directed RNA polymerase II subunit RPB2 [Homo sapiens]	5	4	4	15	1174	133.8	6.87	31.19	4	17.188	0	High
545	42560246	DNA-directed RNA polymerases I and III subunit RPAC1 [Homo sapiens]	21	5	5	7	346	39.2	5.5	21.14	5	16.476	0	High
546	14589951	DNA-directed RNA polymerases I, II, and III subunit RPABC1 [Homo sapiens]	25	3	3	14	210	24.6	5.95	46.26	3	17.601	0	High
547	4504511	dnaJ homolog subfamily A member 1 [Homo sapiens]	29	7	7	68	397	44.8	7.08	215.28	7	39.992	0	High
548	5031741	dnaJ homolog subfamily A member 2 [Homo sapiens]	12	4	4	16	412	45.7	6.48	49.11	4	16.801	0	High
549	205360838	dnaJ homolog subfamily A member 3, mitochondrial isoform 1 [Homo sapiens]	11	3	3	16	480	52.5	9.26	38.78	3	12.544	0	High
550	5453690	dnaJ homolog subfamily B member 1 [Homo sapiens]	25	7	6	19	340	38	8.63	42.71	7	23.972	0	High
551	7706495	dnaJ homolog subfamily B member 11 precursor [Homo sapiens]	12	4	4	15	358	40.5	6.18	61.62	4	23.177	0	High
552	24308127	dnaJ homolog subfamily C member 10 isoform 1 precursor [Homo sapiens]	3	2	2	4	793	91	7.18	10.03	2	5.064	0.001	High
553	217035105	dnaJ homolog subfamily C member 11 [Homo sapiens]	6	3	3	4	559	63.2	8.4	10.82	3	7.486	0	High
554	112293277	dnaJ homolog subfamily C member 8 [Homo sapiens]	7	2	2	5	253	29.8	9.06	13.08	2	6.084	0	High
555	27597059	dnaJ homolog subfamily C member 9 [Homo sapiens]	9	2	2	24	260	29.9	5.73	56.26	2	9.816	0	High
556	20070197	dolichyl-diphosphooligosaccharide--protein glycosyltransferase 48 kDa subunit precursor [Homo sapiens]	22	7	7	90	456	50.7	6.4	311.11	7	50.35	0	High
557	4506675	dolichyl-diphosphooligosaccharide--protein glycosyltransferase subunit 1 precursor [Homo sapiens]	55	26	26	273	607	68.5	6.38	844.78	26	158.532	0	High
558	4503253	dolichyl-diphosphooligosaccharide--protein glycosyltransferase subunit DAD1 [Homo sapiens]	19	2	2	16	113	12.5	7.08	42.72	2	8.242	0	High
559	511630715	dolichyl-diphosphooligosaccharide--protein glycosyltransferase subunit STT3A isoform a [Homo sapiens]	9	6	5	18	705	80.5	8.07	35.36	6	15.052	0	High
560	30578410	dolichyl-diphosphooligosaccharide--protein glycosyltransferase subunit STT3B [Homo sapiens]	10	7	6	40	826	93.6	8.91	94.65	7	24.254	0	High
561	5453994	double-strand-break repair protein rad21 homolog [Homo sapiens]	4	2	2	4	631	71.6	4.65	13.45	2	7.751	0	High
562	171906575	drebrin-like protein isoform c [Homo sapiens]	17	5	5	14	439	49	5.05	35.49	5	29.271	0	High
563	5579478	dual specificity mitogen-activated protein kinase kinase 1 [Homo sapiens]	15	5	5	11	393	43.4	6.62	30.8	5	20.541	0	High
564	4758208	dual specificity protein phosphatase 3 [Homo sapiens]	22	3	3	10	185	20.5	7.8	21.54	3	11.406	0	High
565	205277392	dynactin subunit 1 isoform 3 [Homo sapiens]	13	10	10	21	1253	138.7	5.54	51.1	10	46.954	0	High
566	5453629	dynactin subunit 2 isoform 1 [Homo sapiens]	17	5	5	24	406	44.8	5.17	89.28	5	23.051	0	High
567	510937025	dynamin-1-like protein isoform 5 [Homo sapiens]	17	10	10	45	749	83.3	7.08	135.37	10	49.884	0	High
568	56549121	dynamin-2 isoform 1 [Homo sapiens]	16	10	6	56	870	98	7.44	152.46	10	49.584	0	High
569	224831253	dynamin-like 120 kDa protein, mitochondrial isoform 8 [Homo sapiens]	4	4	4	12	1015	117.7	7.77	37.51	4	14.129	0	High
570	4505813	dynein light chain 1, cytoplasmic [Homo sapiens]	58	4	2	52	89	10.4	7.4	200.35	4	41.4	0	High
571	5730085	dynein light chain Tctex-type 1 isoform 1 [Homo sapiens]	25	2	2	6	113	12.4	5.08	22.11	2	11.869	0	High
572	294997292	dystroglycan preproprotein [Homo sapiens]	13	8	8	25	895	97.5	8.56	81.88	8	58.107	0	High
573	110825982	E3 ISG15--protein ligase HERC5 [Homo sapiens]	8	5	5	10	1024	116.8	7.65	41.44	5	30.64	0	High
574	68160937	E3 ubiquitin/ISG15 ligase TRIM25 [Homo sapiens]	15	6	6	30	630	70.9	8.09	93.95	6	44.041	0	High
575	557440901	E3 ubiquitin-protein ligase BRE1B isoform 1 [Homo sapiens]	2	2	2	7	1001	113.6	6.29	19.16	2	10.472	0	High
576	300797132	E3 ubiquitin-protein ligase Midline-1 isoform 1 [Homo sapiens]	4	2	2	3	667	75.2	6.8	10.76	2	10.363	0	High
577	300795584	echinoderm microtubule-associated protein-like 2 isoform 1 [Homo sapiens]	18	11	11	46	850	92	7.06	132.73	11	40.922	0	High
578	19923497	echinoderm microtubule-associated protein-like 4 isoform a [Homo sapiens]	21	14	14	69	981	108.8	6.32	234.74	14	95.678	0	High
579	20149675	EF-hand domain-containing protein D2 [Homo sapiens]	31	9	9	46	240	26.7	5.2	127.14	9	33.826	0	High
580	31317224	EGF-like repeat and discoidin I-like domain-containing protein 3 isoform 1 precursor [Homo sapiens]	4	2	2	3	480	53.7	7.28	8.5	2	4.88	0.001	High
581	540344518	EH domain-containing protein 1 isoform 2 [Homo sapiens]	32	13	11	37	548	61.9	6.71	103.2	13	47.633	0	High
582	21361462	EH domain-containing protein 2 [Homo sapiens]	23	10	10	34	543	61.1	6.46	95.53	10	43.335	0	High
583	21264315	EH domain-containing protein 4 [Homo sapiens]	20	10	8	38	541	61.1	6.76	127.81	10	35.794	0	High
584	38201714	ELAV-like protein 1 [Homo sapiens]	47	14	14	178	326	36.1	9.17	572.15	14	79.794	0	High
585	4503607	electron transfer flavoprotein subunit alpha, mitochondrial isoform a [Homo sapiens]	61	15	15	315	333	35.1	8.38	1025.17	15	152.906	0	High
586	4503609	electron transfer flavoprotein subunit beta isoform 1 [Homo sapiens]	62	16	16	274	255	27.8	8.1	682.58	16	78.372	0	High
587	4503471	elongation factor 1-alpha 1 [Homo sapiens]	72	31	16	1239	462	50.1	9.01	3674.71	31	280.672	0	High
588	4503475	elongation factor 1-alpha 2 [Homo sapiens]	44	18	3	757	463	50.4	9.03	2025.88	18	115.235	0	High
589	4503477	elongation factor 1-beta [Homo sapiens]	63	10	8	120	225	24.7	4.67	461.73	10	52.48	0	High
590	4503481	elongation factor 1-gamma [Homo sapiens]	51	21	21	419	437	50.1	6.67	1139.27	21	119.889	0	High
591	4503483	elongation factor 2 [Homo sapiens]	68	57	56	1181	858	95.3	6.83	3441.87	57	453.134	0	High
592	18390331	elongation factor G, mitochondrial [Homo sapiens]	16	8	8	44	751	83.4	7.01	135.35	8	38.772	0	High
593	171846268	elongation factor Ts, mitochondrial isoform 2 precursor [Homo sapiens]	25	6	6	31	325	35.4	8.38	107.17	6	33.297	0	High
594	94966754	elongation factor Tu GTP-binding domain-containing protein 1 isoform 1 [Homo sapiens]	5	3	3	9	1120	125.4	5.91	30.98	3	14.851	0	High
595	34147630	elongation factor Tu, mitochondrial precursor [Homo sapiens]	61	20	20	384	455	49.8	7.61	1183.63	20	149.202	0	High
596	13489093	elongation of very long chain fatty acids protein 1 isoform 1 [Homo sapiens]	13	3	3	6	279	32.6	9.6	9.85	3	9.991	0	High
597	4557553	emerin [Homo sapiens]	35	7	7	34	254	29	5.5	67.26	7	26.243	0	High
598	4506929	endophilin-A2 isoform 1 [Homo sapiens]	11	3	3	7	368	41.5	5.43	18.02	3	10.394	0	High
599	5803013	endoplasmic reticulum resident protein 29 isoform 1 precursor [Homo sapiens]	39	8	8	118	261	29	7.31	334.04	8	32.613	0	High
600	52487191	endoplasmic reticulum resident protein 44 precursor [Homo sapiens]	11	4	3	35	406	46.9	5.26	99.41	4	17.374	0	High
601	72534712	endoplasmic reticulum-Golgi intermediate compartment protein 1 [Homo sapiens]	24	5	5	39	290	32.6	7.06	110.01	5	27.386	0	High
602	4507677	endoplasmin precursor [Homo sapiens]	59	48	46	1156	803	92.4	4.84	3550.67	48	358.557	0	High
603	4503453	endothelial differentiation-related factor 1 isoform alpha [Homo sapiens]	16	2	2	9	148	16.4	9.95	29.64	2	13.937	0	High
604	4503443	endothelin-converting enzyme 1 isoform 1 [Homo sapiens]	5	2	2	3	770	87.1	5.88	5.1	2	8.183	0	High
605	4758302	enhancer of rudimentary homolog [Homo sapiens]	57	3	3	36	104	12.3	5.92	80.27	3	22.958	0	High
606	62530384	enoyl-CoA delta isomerase 1, mitochondrial isoform 1 precursor [Homo sapiens]	26	6	6	56	302	32.8	8.54	180.48	6	34.439	0	High
607	194097323	enoyl-CoA hydratase, mitochondrial [Homo sapiens]	43	9	9	126	290	31.4	8.07	411.26	9	83.529	0	High
608	32967311	ephrin type-A receptor 2 precursor [Homo sapiens]	16	11	10	25	976	108.2	6.23	79.45	11	43.615	0	High
609	29725609	epidermal growth factor receptor isoform a precursor [Homo sapiens]	7	5	5	18	1210	134.2	6.68	66.96	5	32.404	0	High
610	525507390	epiplakin [Homo sapiens]	13	12	5	149	5088	555.3	5.62	454.92	12	112.972	0	High
611	600971691	epoxide hydrolase 1 [Homo sapiens]	49	19	19	185	455	52.9	7.25	400.83	19	84.861	0	High
612	194272148	epsin-1 isoform a [Homo sapiens]	5	2	2	7	662	69	5.05	22.98	2	15.229	0	High
613	5803050	ER lumen protein-retaining receptor 2 isoform 1 [Homo sapiens]	18	3	2	4	212	24.4	8.72	10.46	3	8.357	0	High
614	7661910	ER membrane protein complex subunit 2 [Homo sapiens]	21	5	5	23	297	34.8	6.57	72.99	5	19.877	0	High
615	5174615	ER membrane protein complex subunit 8 isoform 1 [Homo sapiens]	13	2	2	4	210	23.8	6.4	12.4	2	7.115	0	High
616	154800487	erlin-1 [Homo sapiens]	15	4	2	24	348	39.1	7.87	74.79	4	22.125	0	High
617	7657069	ERO1-like protein alpha precursor [Homo sapiens]	35	15	15	151	468	54.4	5.68	428.05	15	100.598	0	High
618	38016911	erythrocyte band 7 integral membrane protein isoform a [Homo sapiens]	32	8	8	38	288	31.7	7.88	117.48	8	41.031	0	High
619	613410229	estradiol 17-beta-dehydrogenase 11 precursor [Homo sapiens]	28	7	7	48	300	32.9	9.17	165.34	7	39.58	0	High
620	7705855	estradiol 17-beta-dehydrogenase 12 [Homo sapiens]	24	6	6	27	312	34.3	9.32	80.26	6	22.075	0	High
621	15277342	estradiol 17-beta-dehydrogenase 8 [Homo sapiens]	15	3	3	5	261	27	6.54	20.71	3	13.179	0	High
622	4503529	eukaryotic initiation factor 4A-I isoform 1 [Homo sapiens]	64	29	18	654	406	46.1	5.48	2098.39	29	275.809	0	High
623	83700235	eukaryotic initiation factor 4A-II [Homo sapiens]	36	14	3	395	407	46.4	5.48	1269.27	14	105.712	0	High
624	7661920	eukaryotic initiation factor 4A-III [Homo sapiens]	38	16	13	193	411	46.8	6.73	563.44	16	75.808	0	High
625	4759034	eukaryotic peptide chain release factor subunit 1 isoform 1 [Homo sapiens]	26	12	12	87	437	49	5.71	298.46	12	76.305	0	High
626	4758862	eukaryotic translation elongation factor 1 epsilon-1 isoform 1 [Homo sapiens]	39	5	5	17	174	19.8	8.54	38.79	5	26.152	0	High
627	4503499	eukaryotic translation initiation factor 1A, X-chromosomal [Homo sapiens]	69	8	8	61	144	16.5	5.24	163.67	8	38.011	0	High
628	4758256	eukaryotic translation initiation factor 2 subunit 1 [Homo sapiens]	48	13	13	134	315	36.1	5.08	356.24	13	59.67	0	High
629	29826335	eukaryotic translation initiation factor 2 subunit 2 [Homo sapiens]	45	13	13	158	333	38.4	5.8	456.29	13	77.583	0	High
630	4503507	eukaryotic translation initiation factor 2 subunit 3 [Homo sapiens]	40	14	14	147	472	51.1	8.4	400.88	14	73.768	0	High
631	54873624	eukaryotic translation initiation factor 2A [Homo sapiens]	16	7	7	34	585	64.9	8.87	79.66	7	25.143	0	High
632	4503509	eukaryotic translation initiation factor 3 subunit A [Homo sapiens]	16	18	18	140	1382	166.5	6.79	418.53	18	88.074	0	High
633	33239445	eukaryotic translation initiation factor 3 subunit B [Homo sapiens]	34	20	20	107	814	92.4	5	335.7	20	86.948	0	High
634	153791492	eukaryotic translation initiation factor 3 subunit C-like protein [Homo sapiens]	17	14	14	95	914	105.4	5.64	324.98	14	68.34	0	High
635	4503523	eukaryotic translation initiation factor 3 subunit D [Homo sapiens]	18	7	7	28	548	63.9	6.05	84.49	7	37.683	0	High
636	4503521	eukaryotic translation initiation factor 3 subunit E [Homo sapiens]	26	12	12	76	445	52.2	6.04	182.95	12	45.975	0	High
637	4503519	eukaryotic translation initiation factor 3 subunit F [Homo sapiens]	46	12	12	125	357	37.5	5.45	440.13	12	88.318	0	High
638	49472822	eukaryotic translation initiation factor 3 subunit G [Homo sapiens]	34	8	8	47	320	35.6	6.13	131.46	8	36.301	0	High
639	4503515	eukaryotic translation initiation factor 3 subunit H [Homo sapiens]	18	6	6	33	352	39.9	6.54	109.08	6	25.967	0	High
640	4503513	eukaryotic translation initiation factor 3 subunit I [Homo sapiens]	29	8	8	35	325	36.5	5.64	102.21	8	29.145	0	High
641	83281438	eukaryotic translation initiation factor 3 subunit J isoform 1 [Homo sapiens]	12	2	2	7	258	29	4.83	20.29	2	13.249	0	High
642	10801345	eukaryotic translation initiation factor 3 subunit K [Homo sapiens]	27	5	5	29	218	25	4.93	89.09	5	34.307	0	High
643	7705433	eukaryotic translation initiation factor 3 subunit L isoform 1 [Homo sapiens]	37	18	18	75	564	66.7	6.34	245.9	18	83.797	0	High
644	23397429	eukaryotic translation initiation factor 3 subunit M [Homo sapiens]	32	9	9	48	374	42.5	5.63	161.19	9	55.924	0	High
645	302699247	eukaryotic translation initiation factor 4 gamma 1 isoform 6 [Homo sapiens]	13	15	15	91	1606	176.1	5.34	272.84	15	81.8	0	High
646	289577080	eukaryotic translation initiation factor 4 gamma 2 isoform 1 [Homo sapiens]	14	10	10	40	907	102.3	7.14	118	10	38.132	0	High
647	194578909	eukaryotic translation initiation factor 4E isoform 2 [Homo sapiens]	20	5	5	37	248	28.8	6.42	97.8	5	19.735	0	High
648	11559923	eukaryotic translation initiation factor 4H isoform 1 [Homo sapiens]	20	3	3	27	248	27.4	7.23	65.46	3	11.836	0	High
649	21361337	eukaryotic translation initiation factor 5 [Homo sapiens]	19	8	8	55	431	49.2	5.58	165.38	8	42.214	0	High
650	219555707	eukaryotic translation initiation factor 5A-1 isoform A [Homo sapiens]	56	12	12	220	184	20.2	7.01	582.7	12	104.159	0	High
651	84043963	eukaryotic translation initiation factor 5B [Homo sapiens]	17	14	14	74	1220	138.7	5.49	239.17	14	99.342	0	High
652	392494084	eukaryotic translation initiation factor 6 isoform a [Homo sapiens]	47	7	7	70	245	26.6	4.68	243.16	7	59.1	0	High
653	7705612	exosome complex component CSL4 [Homo sapiens]	30	4	4	23	195	21.4	8.24	60.81	4	29.556	0	High
654	19923403	exosome complex component RRP4 isoform 1 [Homo sapiens]	9	2	2	5	293	32.8	7.5	18.71	2	9.623	0	High
655	50511943	exosome complex component RRP40 isoform 1 [Homo sapiens]	13	2	2	13	275	29.6	8.1	36.3	2	9.94	0	High
656	47174864	exosome complex component RRP46 [Homo sapiens]	14	2	2	6	235	25.2	7.59	22.03	2	11.78	0	High
657	190014623	exosome complex exonuclease RRP44 isoform a [Homo sapiens]	3	2	2	7	958	108.9	7.14	19.59	2	9.932	0	High
658	46370066	exostosin-1 [Homo sapiens]	5	2	2	3	746	86.2	9.04	11.99	2	8.414	0	High
659	4507943	exportin-1 [Homo sapiens]	21	19	19	75	1071	123.3	6.06	206.83	19	86.626	0	High
660	29029559	exportin-2 isoform 1 [Homo sapiens]	30	24	24	138	971	110.3	5.77	388.22	24	120.538	0	High
661	22748937	exportin-5 [Homo sapiens]	2	2	2	6	1204	136.2	5.8	21.05	2	6.602	0	High
662	154448892	exportin-7 [Homo sapiens]	5	3	3	9	1087	123.8	6.32	37.88	3	17.616	0	High
663	296317244	extended synaptotagmin-1 isoform 1 [Homo sapiens]	21	16	16	87	1114	123.9	5.78	255.7	16	93.357	0	High
664	45387945	extended synaptotagmin-2 [Homo sapiens]	6	4	4	10	893	98.8	8.68	27.47	4	17.975	0	High
665	161702986	ezrin [Homo sapiens]	64	41	28	741	586	69.4	6.27	2268.42	41	250.521	0	High
666	6005757	FACT complex subunit SPT16 [Homo sapiens]	19	14	14	88	1047	119.8	5.66	249.8	14	81.317	0	High
667	5453597	F-actin-capping protein subunit alpha-1 [Homo sapiens]	39	7	5	83	286	32.9	5.69	273.55	7	49.445	0	High
668	5453599	F-actin-capping protein subunit alpha-2 [Homo sapiens]	43	8	6	88	286	32.9	5.85	288.89	8	54.87	0	High
669	531990816	F-actin-capping protein subunit beta isoform 4 [Homo sapiens]	50	13	2	108	301	33.8	6.43	257.99	13	62.5	0	High
670	17402900	far upstream element-binding protein 1 [Homo sapiens]	40	18	16	128	644	67.5	7.61	348.31	18	83.002	0	High
671	100816392	far upstream element-binding protein 3 [Homo sapiens]	16	7	4	25	572	61.6	8.38	82.49	7	28.796	0	High
672	4503685	farnesyl pyrophosphate synthase isoform a [Homo sapiens]	5	2	2	5	419	48.2	6.15	9.49	2	6.59	0	High
673	24797106	FAS-associated factor 2 [Homo sapiens]	18	6	6	15	445	52.6	5.62	38.96	6	24.969	0	High
674	4507115	fascin [Homo sapiens]	27	10	10	47	493	54.5	7.24	127.28	10	39.057	0	High
675	209969830	FAST kinase domain-containing protein 2 [Homo sapiens]	6	3	3	10	710	81.4	8.05	26.66	3	14.696	0	High
676	11141903	FAST kinase domain-containing protein 5 [Homo sapiens]	2	2	2	7	764	86.5	8.13	9.09	2	6.104	0	High
677	4758334	fatty acid desaturase 2 isoform 1 [Homo sapiens]	7	3	3	10	444	52.2	8.82	28.2	3	9.48	0	High
678	41872631	fatty acid synthase [Homo sapiens]	30	53	53	362	2511	273.3	6.44	1013.91	53	330.137	0	High
679	4557581	fatty acid-binding protein, epidermal [Homo sapiens]	47	5	5	42	135	15.2	7.01	99.19	5	25.156	0	High
680	73466520	fatty aldehyde dehydrogenase isoform 1 [Homo sapiens]	27	12	11	146	508	57.6	8.92	401.27	12	65.331	0	High
681	56682959	ferritin heavy chain [Homo sapiens]	11	2	2	4	183	21.2	5.55	9.96	2	5.03	0.001	High
682	60499025	ferrochelatase, mitochondrial isoform a precursor [Homo sapiens]	9	3	3	23	429	48.6	8.72	75.51	3	13.604	0	High
683	16933542	fibronectin isoform 3 preproprotein [Homo sapiens]	35	58	58	398	2355	259.1	5.73	1238.83	58	386.199	0	High
684	205360932	fibronectin type III domain-containing protein 3B [Homo sapiens]	2	2	2	6	1204	132.8	5.95	14.44	2	5.089	0.001	High
685	60097902	filaggrin [Homo sapiens]	3	3	3	5	4061	434.9	9.25	16.53	3	17.192	0	High
686	62122917	filaggrin-2 [Homo sapiens]	3	4	4	12	2391	247.9	8.31	29.85	4	13.407	0	High
687	160420317	filamin-A isoform 2 [Homo sapiens]	69	138	126	3456	2647	280.6	6.06	11074.5	138	1109.83	0	High
688	256222411	filamin-B isoform 1 [Homo sapiens]	70	136	2	2678	2633	281.5	5.71	8408.93	136	1098.68	0	High
689	4758356	flap endonuclease 1 [Homo sapiens]	25	6	6	30	380	42.6	8.62	84.42	6	31.682	0	High
690	4502419	flavin reductase (NADPH) [Homo sapiens]	31	4	4	120	206	22.1	7.65	392.53	4	46.51	0	High
691	94538362	flotillin-2 [Homo sapiens]	19	6	6	14	428	47	5.25	44.07	6	31.386	0	High
692	82546824	forkhead box protein K1 [Homo sapiens]	4	2	2	7	733	75.4	9.32	29.79	2	10.821	0	High
693	9966849	fructose-2,6-bisphosphatase TIGAR [Homo sapiens]	14	3	3	18	270	30	7.69	59.14	3	15.481	0	High
694	342187211	fructose-bisphosphate aldolase A isoform 2 [Homo sapiens]	76	32	28	832	418	45.2	8.25	2841.42	32	311.143	0	High
695	19743875	fumarate hydratase, mitochondrial [Homo sapiens]	32	9	9	96	510	54.6	8.76	340.84	9	68.776	0	High
696	4557587	fumarylacetoacetase [Homo sapiens]	9	3	3	6	419	46.3	6.95	17.62	3	13.966	0	High
697	577019580	furin preproprotein [Homo sapiens]	3	2	2	2	794	86.6	6.47	7.11	2	9.17	0	High
698	15811782	G patch domain and KOW motifs-containing protein [Homo sapiens]	6	2	2	4	476	52.2	6.15	10.04	2	7.128	0	High
699	4503895	galactokinase [Homo sapiens]	15	4	4	10	392	42.2	6.46	30.15	4	22.469	0	High
700	12408654	galactosylgalactosylxylosylprotein 3-beta-glucuronosyltransferase 3 isoform 1 [Homo sapiens]	7	2	2	6	335	37.1	8.27	15.34	2	6.217	0	High
701	4504981	galectin-1 [Homo sapiens]	59	7	7	144	135	14.7	5.5	393.17	7	35.951	0	High
702	115430223	galectin-3 isoform 1 [Homo sapiens]	19	4	4	75	250	26.1	8.56	162.94	4	30.542	0	High
703	5031863	galectin-3-binding protein precursor [Homo sapiens]	22	12	12	51	585	65.3	5.27	152.57	12	56.482	0	High
704	5803011	gamma-enolase [Homo sapiens]	25	7	2	262	434	47.2	5.03	938.48	7	64.389	0	High
705	4503987	gamma-glutamyl hydrolase precursor [Homo sapiens]	12	4	4	18	318	35.9	7.11	53.06	4	14.87	0	High
706	13129018	gamma-glutamylcyclotransferase isoform 1 [Homo sapiens]	20	4	4	13	188	21	5.14	37.3	4	18.336	0	High
707	4505331	gamma-soluble NSF attachment protein [Homo sapiens]	10	2	2	6	312	34.7	5.41	19.46	2	11.117	0	High
708	27436889	GDP-fucose protein O-fucosyltransferase 1 isoform 1 precursor [Homo sapiens]	7	2	2	13	388	43.9	8.53	23.38	2	7.734	0	High
709	157739942	gem-associated protein 5 isoform 1 [Homo sapiens]	3	3	3	11	1508	168.5	6.62	40.1	3	26.005	0	High
710	144922725	general transcription factor IIE subunit 1 [Homo sapiens]	5	2	2	5	439	49.4	4.82	14.83	2	5.656	0.001	High
711	586798211	general vesicular transport factor p115 isoform 1 [Homo sapiens]	9	7	7	19	973	109.1	4.89	56.96	7	37.884	0	High
712	211904156	glia-derived nexin isoform c precursor [Homo sapiens]	19	7	7	24	409	45.2	9.22	66.52	7	42.038	0	High
713	109389365	glucose-6-phosphate 1-dehydrogenase isoform a [Homo sapiens]	75	32	32	767	545	62.4	8.05	2081.35	32	263.016	0	High
714	577019448	glucose-6-phosphate isomerase isoform 3 [Homo sapiens]	54	24	24	426	597	67.2	8.97	1274.19	24	204.435	0	High
715	4885281	glutamate dehydrogenase 1, mitochondrial precursor [Homo sapiens]	52	26	26	354	558	61.4	7.8	1103.52	26	158.465	0	High
716	4557625	glutamate--cysteine ligase catalytic subunit isoform a [Homo sapiens]	19	8	8	26	637	72.7	6.09	69.05	8	28.606	0	High
717	4504011	glutamate--cysteine ligase regulatory subunit [Homo sapiens]	15	3	3	18	274	30.7	6.02	71.03	3	16.05	0	High
718	237820620	glutamate-rich WD repeat-containing protein 1 [Homo sapiens]	8	2	2	2	446	49.4	4.92	9.88	2	11.924	0	High
719	373251164	glutaminase kidney isoform, mitochondrial isoform 2 [Homo sapiens]	42	17	17	100	598	65.4	7.88	333.67	17	108.782	0	High
720	347659028	glutamine--fructose-6-phosphate aminotransferase [isomerizing] 1 isoform 1 [Homo sapiens]	27	13	13	61	699	78.8	7.11	183.46	13	74.508	0	High
721	4826960	glutamine--tRNA ligase isoform a [Homo sapiens]	31	18	18	72	775	87.7	7.15	213.52	18	82.011	0	High
722	4504025	glutaredoxin-1 [Homo sapiens]	42	3	3	18	106	11.8	8.09	53.13	3	13.829	0	High
723	315467838	glutaredoxin-3 [Homo sapiens]	33	10	10	46	335	37.4	5.39	135.97	10	40.356	0	High
724	50301238	glutathione reductase, mitochondrial isoform 1 precursor [Homo sapiens]	51	17	17	153	522	56.2	8.5	464	17	123.372	0	High
725	7705704	glutathione S-transferase kappa 1 isoform a [Homo sapiens]	47	8	8	64	226	25.5	8.41	239.83	8	45.741	0	High
726	4758484	glutathione S-transferase omega-1 isoform 1 [Homo sapiens]	17	4	4	39	241	27.5	6.6	95.95	4	14.22	0	High
727	4504183	glutathione S-transferase P [Homo sapiens]	58	9	9	357	210	23.3	5.64	1340.05	9	139.298	0	High
728	7669492	glyceraldehyde-3-phosphate dehydrogenase isoform 1 [Homo sapiens]	84	23	23	1128	335	36	8.46	3685.39	23	373.806	0	High
729	285002231	glycerol-3-phosphate dehydrogenase, mitochondrial precursor [Homo sapiens]	30	15	15	99	727	80.8	7.69	302.94	15	76.568	0	High
730	49574537	glycine cleavage system H protein, mitochondrial precursor [Homo sapiens]	17	2	2	17	173	18.9	4.88	52.05	2	15.055	0	High
731	116805340	glycine--tRNA ligase precursor [Homo sapiens]	37	24	24	225	739	83.1	7.03	659.04	24	139.219	0	High
732	21361370	glycogen phosphorylase, brain form [Homo sapiens]	43	28	22	227	843	96.6	6.86	714.17	28	179.588	0	High
733	71037379	glycogen phosphorylase, liver form isoform 1 [Homo sapiens]	15	9	4	55	847	97.1	7.17	133.67	9	50.206	0	High
734	7705987	glycolipid transfer protein [Homo sapiens]	26	6	6	25	209	23.8	7.39	71.27	6	20.857	0	High
735	217330598	glyoxalase domain-containing protein 4 [Homo sapiens]	19	6	6	51	298	33.2	5.6	124.37	6	17.349	0	High
736	6912396	glyoxylate reductase/hydroxypyruvate reductase [Homo sapiens]	40	8	8	73	328	35.6	7.39	228.91	8	57.379	0	High
737	167001141	glypican-1 precursor [Homo sapiens]	5	2	2	3	558	61.6	7.3	9.44	2	8.031	0	High
738	4504035	GMP synthase [glutamine-hydrolyzing] [Homo sapiens]	23	11	11	57	693	76.7	6.87	129.03	11	48.31	0	High
739	54633312	Golgi apparatus protein 1 isoform 1 precursor [Homo sapiens]	9	8	8	16	1203	137.1	6.9	40.2	8	35.904	0	High
740	29550838	Golgi membrane protein 1 [Homo sapiens]	6	3	3	8	401	45.3	4.97	26.41	3	10.865	0	High
741	11545859	Golgi phosphoprotein 3 [Homo sapiens]	10	2	2	10	298	33.8	6.44	23.89	2	14.263	0	High
742	29826294	Golgi reassembly-stacking protein 2 isoform 1 [Homo sapiens]	20	5	5	36	452	47.1	4.82	121.91	5	27.691	0	High
743	15826852	Golgi resident protein GCP60 [Homo sapiens]	14	4	4	12	528	60.6	5.06	48.72	4	24.346	0	High
744	374532817	Golgin subfamily B member 1 isoform 1 [Homo sapiens]	2	4	4	9	3269	376.9	5	24.55	4	26.214	0	High
745	15088795	GPI transamidase component PIG-S [Homo sapiens]	9	3	3	14	555	61.6	6.49	64.37	3	29.392	0	High
746	23397653	GPI transamidase component PIG-T isoform 1 precursor [Homo sapiens]	8	4	4	16	578	65.7	8.38	41.65	4	17.255	0	High
747	4504111	growth factor receptor-bound protein 2 isoform 1 [Homo sapiens]	21	5	5	11	217	25.2	6.32	28.6	5	14.878	0	High
748	118200356	growth hormone-inducible transmembrane protein [Homo sapiens]	6	2	2	3	345	37.2	9.94	7.62	2	5.724	0.001	High
749	24308295	grpE protein homolog 1, mitochondrial precursor [Homo sapiens]	14	3	3	32	217	24.3	8.12	88.6	3	10.743	0	High
750	19923437	GTP:AMP phosphotransferase AK3, mitochondrial isoform a [Homo sapiens]	48	9	9	41	227	25.6	9.16	128.9	9	38.341	0	High
751	15718761	GTPase KRas isoform b [Homo sapiens]	26	4	2	16	188	21.4	8.12	42.9	4	14.574	0	High
752	4505451	GTPase NRas [Homo sapiens]	33	5	3	14	189	21.2	5.17	37.67	5	17.408	0	High
753	5453555	GTP-binding nuclear protein Ran isoform 1 [Homo sapiens]	44	12	12	289	216	24.4	7.49	782.79	12	104.057	0	High
754	5032041	GTP-binding protein Rheb [Homo sapiens]	15	2	2	6	184	20.5	5.92	18.69	2	8.206	0	High
755	9910542	GTP-binding protein SAR1a [Homo sapiens]	27	4	4	19	198	22.4	6.68	55.88	4	14.897	0	High
756	261878575	guanine nucleotide-binding protein G(i) subunit alpha-2 isoform 2 [Homo sapiens]	22	6	4	34	318	36.4	5.59	94.57	6	27.445	0	High
757	51036603	guanine nucleotide-binding protein G(I)/G(S)/G(O) subunit gamma-12 precursor [Homo sapiens]	67	4	4	43	72	8	8.97	134.34	4	17.256	0	High
758	543173169	guanine nucleotide-binding protein G(I)/G(S)/G(T) subunit beta-1 isoform 1 [Homo sapiens]	37	9	3	120	340	37.4	6	350.79	9	65.417	0	High
759	20357529	guanine nucleotide-binding protein G(I)/G(S)/G(T) subunit beta-2 [Homo sapiens]	36	9	3	139	340	37.3	6	387.55	9	55.646	0	High
760	5729850	guanine nucleotide-binding protein G(k) subunit alpha [Homo sapiens]	24	6	3	34	354	40.5	5.69	100.6	6	34.366	0	High
761	5174447	guanine nucleotide-binding protein subunit beta-2-like 1 [Homo sapiens]	70	19	19	337	317	35.1	7.69	1087.21	19	134.124	0	High
762	45593130	guanine nucleotide-binding protein-like 3 isoform 1 [Homo sapiens]	21	10	10	35	549	62	9.16	89.3	10	31.713	0	High
763	8923444	H/ACA ribonucleoprotein complex subunit 2 isoform a [Homo sapiens]	19	2	2	20	153	17.2	8.22	73.45	2	12.019	0	High
764	4503337	H/ACA ribonucleoprotein complex subunit 4 isoform 1 [Homo sapiens]	15	5	5	29	514	57.6	9.42	77.61	5	33.671	0	High
765	CAA24272.1	haemagglutinin [Influenza A virus (A/Puerto Rico/8/1934(H1N1))]	54	33	4	1487	566	63.3	7.4	4313.59	33	274.951	0	High
766	5729864	HBS1-like protein isoform 1 [Homo sapiens]	5	2	2	5	684	75.4	6.61	16.88	2	10.271	0	High
767	73695475	HEAT repeat-containing protein 1 [Homo sapiens]	5	9	9	35	2144	242.2	6.54	96.46	9	44.929	0	High
768	167466173	heat shock 70 kDa protein 1A/1B [Homo sapiens]	68	38	32	967	641	70	5.66	3147.38	38	304.346	0	High
769	38327039	heat shock 70 kDa protein 4 [Homo sapiens]	36	23	22	273	840	94.3	5.19	896.54	23	152.551	0	High
770	5729877	heat shock cognate 71 kDa protein isoform 1 [Homo sapiens]	76	51	35	2190	646	70.9	5.52	7511.4	51	593.629	0	High
771	155722983	heat shock protein 75 kDa, mitochondrial isoform 1 precursor [Homo sapiens]	34	17	16	225	704	80.1	8.21	778.67	17	116.895	0	High
772	4504517	heat shock protein beta-1 [Homo sapiens]	59	11	11	249	205	22.8	6.4	717.12	11	70.865	0	High
773	153792590	heat shock protein HSP 90-alpha isoform 1 [Homo sapiens]	58	58	35	1589	854	98.1	5.16	4844.55	58	456.232	0	High
774	13676857	heat shock-related 70 kDa protein 2 [Homo sapiens]	31	19	4	799	639	70	5.74	2558.23	19	150.278	0	High
775	156105693	helicase with zinc finger domain 2 isoform 1 [Homo sapiens]	2	3	3	6	2649	294.5	7.49	24.15	3	16.108	0	High
776	ABP64721.1	hemagglutinin [Influenza A virus (A/hvPR8/34(H1N1))]	48	37	8	1957	566	63.4	7.53	5614.4	37	357.196	0	High
777	21700763	hematological and neurological expressed 1-like protein [Homo sapiens]	24	3	3	26	190	20.1	9.26	74.7	3	15.474	0	High
778	4504437	heme oxygenase 1 [Homo sapiens]	31	6	6	27	288	32.8	8.25	72.16	6	24.067	0	High
779	20336761	heme-binding protein 1 [Homo sapiens]	17	3	3	5	189	21.1	5.8	7.36	3	8.564	0	High
780	4758528	hepatocyte growth factor-regulated tyrosine kinase substrate [Homo sapiens]	5	3	3	6	777	86.1	6.16	18.54	3	11.245	0	High
781	4758516	hepatoma-derived growth factor isoform a [Homo sapiens]	56	12	12	72	240	26.8	4.73	184.69	12	57.957	0	High
782	281485618	hephaestin isoform a [Homo sapiens]	3	3	3	6	1212	136.6	6.28	19.83	3	11.766	0	High
783	55956921	heterogeneous nuclear ribonucleoprotein A/B isoform b [Homo sapiens]	40	12	11	182	285	30.6	7.91	539.89	12	57.22	0	High
784	5803036	heterogeneous nuclear ribonucleoprotein A0 [Homo sapiens]	33	6	6	46	305	30.8	9.29	169.46	6	41.029	0	High
785	4504445	heterogeneous nuclear ribonucleoprotein A1 isoform a [Homo sapiens]	77	21	19	571	320	34.2	9.23	1747.36	21	181.473	0	High
786	34740329	heterogeneous nuclear ribonucleoprotein A3 [Homo sapiens]	34	13	13	251	378	39.6	9.01	776.31	13	89.438	0	High
787	14110420	heterogeneous nuclear ribonucleoprotein D0 isoform a [Homo sapiens]	35	13	11	162	355	38.4	7.81	500.39	13	59.426	0	High
788	14110407	heterogeneous nuclear ribonucleoprotein D-like isoform a [Homo sapiens]	21	9	7	147	420	46.4	9.57	416.42	9	33.814	0	High
789	148470406	heterogeneous nuclear ribonucleoprotein F [Homo sapiens]	31	8	6	190	415	45.6	5.58	728.75	8	80.361	0	High
790	9624998	heterogeneous nuclear ribonucleoprotein H2 [Homo sapiens]	20	6	2	173	449	49.2	6.3	677.64	6	55.283	0	High
791	14165439	heterogeneous nuclear ribonucleoprotein K isoform a [Homo sapiens]	54	23	23	860	464	51	5.33	3115.8	23	221.761	0	High
792	52632383	heterogeneous nuclear ribonucleoprotein L isoform a [Homo sapiens]	68	23	22	304	589	64.1	8.22	964.45	23	197.72	0	High
793	14141152	heterogeneous nuclear ribonucleoprotein M isoform a [Homo sapiens]	55	32	2	440	730	77.5	8.7	1348.07	32	191.14	0	High
794	228008400	heterogeneous nuclear ribonucleoprotein Q isoform 6 [Homo sapiens]	48	25	18	397	562	62.6	7.56	1108.75	25	145.749	0	High
795	5031755	heterogeneous nuclear ribonucleoprotein R isoform 2 [Homo sapiens]	35	19	12	367	633	70.9	8.13	993.64	19	100.648	0	High
796	74136883	heterogeneous nuclear ribonucleoprotein U isoform a [Homo sapiens]	36	24	24	577	825	90.5	6	1781.93	24	150.097	0	High
797	118601081	heterogeneous nuclear ribonucleoprotein U-like protein 2 [Homo sapiens]	27	17	17	91	747	85.1	4.91	294.84	17	84.611	0	High
798	117189975	heterogeneous nuclear ribonucleoproteins C1/C2 isoform a [Homo sapiens]	46	17	8	413	306	33.7	5.08	1227.16	17	111.412	0	High
799	194688133	high mobility group protein B2 [Homo sapiens]	37	9	7	49	209	24	7.81	162.65	9	53.262	0	High
800	22208967	high mobility group protein HMG-I/HMG-Y isoform a [Homo sapiens]	34	6	3	111	107	11.7	10.32	325.32	6	32.94	0	High
801	4885413	histidine triad nucleotide-binding protein 1 [Homo sapiens]	67	5	5	45	126	13.8	6.95	163.53	5	59.342	0	High
802	6996014	histidine--tRNA ligase, cytoplasmic isoform 1 [Homo sapiens]	16	8	4	24	509	57.4	5.88	77.3	8	28.755	0	High
803	4504341	histone acetyltransferase type B catalytic subunit [Homo sapiens]	13	3	3	9	419	49.5	5.69	37.69	3	19.35	0	High
804	13128860	histone deacetylase 1 [Homo sapiens]	22	7	3	38	482	55.1	5.48	115.82	7	49.669	0	High
805	293336691	histone deacetylase 2 [Homo sapiens]	26	8	4	34	488	55.3	5.91	106.93	8	57.888	0	High
806	215490089	histone deacetylase complex subunit SAP18 [Homo sapiens]	16	2	2	3	172	19.5	9.8	10.68	2	8.734	0	High
807	4885371	histone H1.0 [Homo sapiens]	17	3	3	28	194	20.9	10.84	69.16	3	10.213	0	High
808	4885377	histone H1.3 [Homo sapiens]	38	15	2	459	221	22.3	11.02	1297.52	15	77.35	0	High
809	4885381	histone H1.5 [Homo sapiens]	31	10	6	176	226	22.6	10.92	459.41	10	38.772	0	High
810	5174449	histone H1x [Homo sapiens]	25	6	6	69	213	22.5	10.76	239.65	6	30.842	0	High
811	4504245	histone H2A type 1-C [Homo sapiens]	64	10	2	662	130	14.1	11.05	2300.32	10	130.58	0	High
812	106775678	histone H2A type 2-A [Homo sapiens]	64	10	3	647	130	14.1	10.9	2199.76	10	137.051	0	High
813	28195394	histone H2A type 2-B [Homo sapiens]	63	7	3	314	130	14	10.89	1055.03	7	83.992	0	High
814	4504255	histone H2A.Z [Homo sapiens]	54	6	4	353	128	13.5	10.58	961.73	6	64.227	0	High
815	4504323	histone H4 [Homo sapiens]	61	14	14	997	103	11.4	11.36	3017.53	14	117.381	0	High
816	5032027	histone-binding protein RBBP4 isoform a [Homo sapiens]	35	9	4	53	425	47.6	4.89	152.65	9	31.81	0	High
817	4506439	histone-binding protein RBBP7 isoform 2 [Homo sapiens]	21	8	3	57	425	47.8	5.05	168.3	8	33.774	0	High
818	339882741	HLA class I histocompatibility antigen, Cw-1 alpha chain precursor [Homo sapiens]	18	4	3	12	366	40.7	5.87	34.2	4	19.544	0	High
819	19923193	hsc70-interacting protein isoform 1 [Homo sapiens]	19	7	7	81	369	41.3	5.27	207.24	7	36.479	0	High
820	662236737	hsp70-binding protein 1 isoform 1 [Homo sapiens]	16	4	4	11	405	44.4	6.47	33.74	4	18.256	0	High
821	5901922	hsp90 co-chaperone Cdc37 [Homo sapiens]	18	5	5	71	378	44.4	5.25	199.24	5	29.499	0	High
822	321117267	HSPE1-MOB4 protein [Homo sapiens]	31	10	2	190	261	29.7	6.16	566.34	10	44.636	0	High
823	296179427	hydroxyacyl-coenzyme A dehydrogenase, mitochondrial isoform 1 precursor [Homo sapiens]	40	7	7	21	331	36	8.53	72.85	7	38.549	0	High
824	94538322	hydroxyacylglutathione hydrolase, mitochondrial isoform 1 precursor [Homo sapiens]	9	2	2	4	308	33.8	8.12	8.85	2	9.695	0	High
825	148298677	hydroxymethylglutaryl-CoA synthase, cytoplasmic [Homo sapiens]	10	4	4	6	520	57.3	5.41	7.78	4	21.714	0	High
826	40254986	hydroxysteroid dehydrogenase-like protein 2 isoform 1 [Homo sapiens]	5	2	2	4	418	45.4	7.99	13.3	2	7.514	0	High
827	4504483	hypoxanthine-guanine phosphoribosyltransferase [Homo sapiens]	51	9	9	51	218	24.6	6.68	156.58	9	39.934	0	High
828	4504897	importin subunit alpha-1 [Homo sapiens]	26	9	9	62	529	57.8	5.4	207.11	9	50.925	0	High
829	4504901	importin subunit alpha-3 [Homo sapiens]	32	8	6	41	521	57.9	4.96	130.51	8	66.03	0	High
830	34485722	importin subunit alpha-4 [Homo sapiens]	17	6	4	22	521	57.8	4.94	51.77	6	21.815	0	High
831	19923142	importin subunit beta-1 isoform 1 [Homo sapiens]	36	24	24	339	876	97.1	4.78	1138.33	24	146.072	0	High
832	62460637	importin-4 [Homo sapiens]	10	7	7	29	1081	118.6	4.96	70.38	7	30.698	0	High
833	5453998	importin-7 [Homo sapiens]	28	21	20	137	1038	119.4	4.82	428.24	21	149.385	0	High
834	21361659	importin-9 [Homo sapiens]	5	2	2	11	1041	115.9	4.81	45.48	2	19.378	0	High
835	393715082	inactive tyrosine-protein kinase 7 isoform e [Homo sapiens]	2	2	2	7	1078	119.1	6.96	21.27	2	7.906	0	High
836	24233517	inhibitor of nuclear factor kappa-B kinase-interacting protein isoform 1 [Homo sapiens]	23	7	5	28	377	43.1	4.92	104.83	7	33.475	0	High
837	11056044	inorganic pyrophosphatase [Homo sapiens]	57	12	11	94	289	32.6	5.86	285	12	92.546	0	High
838	29171702	inorganic pyrophosphatase 2, mitochondrial isoform 1 precursor [Homo sapiens]	18	5	4	53	334	37.9	7.39	147.2	5	26.619	0	High
839	221625487	inositol monophosphatase 1 isoform 2 [Homo sapiens]	6	2	2	16	336	36.7	7.91	41.07	2	12.46	0	High
840	157388900	inositol monophosphatase 3 [Homo sapiens]	9	3	3	9	359	38.7	6.86	20.81	3	10.325	0	High
841	155969707	insulin-degrading enzyme isoform 1 [Homo sapiens]	7	6	6	29	1019	117.9	6.61	74.97	6	22.079	0	High
842	56237027	insulin-like growth factor 2 mRNA-binding protein 1 isoform 1 [Homo sapiens]	41	19	17	188	577	63.4	9.2	653.75	19	97.923	0	High
843	30795212	insulin-like growth factor 2 mRNA-binding protein 3 [Homo sapiens]	27	12	9	92	579	63.7	8.87	274.2	12	74.264	0	High
844	62243290	insulin-like growth factor-binding protein 4 precursor [Homo sapiens]	18	4	4	13	258	27.9	7.15	38.51	4	18.513	0	High
845	11321593	insulin-like growth factor-binding protein 6 precursor [Homo sapiens]	19	3	3	8	240	25.3	7.81	20.58	3	16.436	0	High
846	4504619	insulin-like growth factor-binding protein 7 isoform 1 precursor [Homo sapiens]	22	6	6	34	282	29.1	7.9	76.79	6	45.013	0	High
847	116295258	integrin alpha-2 precursor [Homo sapiens]	6	5	5	23	1181	129.2	5.25	97.2	5	33.052	0	High
848	6006011	integrin alpha-3 isoform b precursor [Homo sapiens]	16	14	14	50	1066	118.7	6.96	132.94	14	47.151	0	High
849	119395740	integrin alpha-6 isoform a precursor [Homo sapiens]	10	9	9	45	1091	122	6.8	118.04	9	39.111	0	High
850	4504763	integrin alpha-V isoform 1 precursor [Homo sapiens]	18	15	15	63	1048	116	5.68	182.52	15	57.485	0	High
851	19743813	integrin beta-1 isoform 1A precursor [Homo sapiens]	35	19	19	273	798	88.4	5.39	804.1	19	128.945	0	High
852	47078292	integrin beta-3 precursor [Homo sapiens]	4	3	3	6	788	87	5.24	14.42	3	7.829	0	High
853	20127446	integrin beta-5 precursor [Homo sapiens]	14	8	8	36	799	88	6.06	141.5	8	49.057	0	High
854	70778918	inter-alpha-trypsin inhibitor heavy chain H2 precursor [Homo sapiens]	5	4	4	7	946	106.4	6.86	19.38	4	14.058	0	High
855	116734704	interferon regulatory factor 2-binding protein 2 isoform A [Homo sapiens]	9	2	2	9	587	61	8.69	33.79	2	21.745	0	High
856	306922358	interferon-induced 35 kDa protein [Homo sapiens]	13	2	2	11	288	31.8	6.09	44.12	2	15.035	0	High
857	27886568	interferon-induced helicase C domain-containing protein 1 [Homo sapiens]	4	2	2	4	1025	116.6	5.52	19.53	2	13.353	0	High
858	116534937	interferon-induced protein with tetratricopeptide repeats 1 isoform 1 [Homo sapiens]	30	11	11	50	478	55.3	7.2	136.33	11	62.772	0	High
859	153082755	interferon-induced protein with tetratricopeptide repeats 2 [Homo sapiens]	19	6	6	15	472	54.6	6.76	28.22	6	27.469	0	High
860	72534658	interferon-induced protein with tetratricopeptide repeats 3 isoform a [Homo sapiens]	16	5	5	12	490	56	5.2	35.45	5	24.33	0	High
861	6912630	interferon-induced protein with tetratricopeptide repeats 5 [Homo sapiens]	4	2	2	5	482	55.8	7.4	15.24	2	10.334	0	High
862	148612842	interferon-induced transmembrane protein 3 [Homo sapiens]	31	2	2	9	133	14.6	7.01	42.23	2	15.725	0	High
863	208431827	interferon-induced, double-stranded RNA-activated protein kinase isoform a [Homo sapiens]	18	7	7	35	551	62.1	8.4	134.78	7	46.785	0	High
864	4505581	interferon-inducible double-stranded RNA-dependent protein kinase activator A isoform 1 [Homo sapiens]	21	4	4	10	313	34.4	8.41	10.95	4	23.975	0	High
865	24234747	interleukin enhancer-binding factor 2 isoform 1 [Homo sapiens]	55	17	17	288	390	43	5.26	1110	17	147.733	0	High
866	212549553	interleukin enhancer-binding factor 3 isoform d [Homo sapiens]	46	29	29	338	898	95.7	8.81	970.58	29	167.286	0	High
867	103471987	isochorismatase domain-containing protein 1 [Homo sapiens]	16	3	3	6	298	32.2	7.39	21.8	3	20.181	0	High
868	13376007	isochorismatase domain-containing protein 2, mitochondrial isoform 2 [Homo sapiens]	19	2	2	12	221	24.1	7.77	53.18	2	24.289	0	High
869	5031777	isocitrate dehydrogenase [NAD] subunit alpha, mitochondrial precursor [Homo sapiens]	39	12	12	82	366	39.6	6.92	221.99	12	58.351	0	High
870	4758582	isocitrate dehydrogenase [NAD] subunit gamma, mitochondrial isoform a precursor [Homo sapiens]	22	4	4	14	393	42.8	8.5	46.15	4	21.775	0	High
871	538917488	isocitrate dehydrogenase [NADP] cytoplasmic [Homo sapiens]	32	11	10	150	414	46.6	7.01	364.63	11	50.479	0	High
872	28178832	isocitrate dehydrogenase [NADP], mitochondrial isoform 1 precursor [Homo sapiens]	35	15	14	103	452	50.9	8.69	271.47	15	71.54	0	High
873	94721241	isoleucine--tRNA ligase, cytoplasmic [Homo sapiens]	16	16	16	65	1262	144.4	6.15	180.89	16	61.178	0	High
874	46852147	isoleucine--tRNA ligase, mitochondrial precursor [Homo sapiens]	23	19	19	88	1012	113.7	7.2	238.27	19	77.792	0	High
875	40018633	isopentenyl-diphosphate Delta-isomerase 1 [Homo sapiens]	14	3	3	7	284	32.5	7.88	19.96	3	14.613	0	High
876	401709932	IST1 homolog isoform c [Homo sapiens]	5	2	2	4	379	41.5	5.57	11.7	2	6.221	0	High
877	8393638	junctional adhesion molecule A precursor [Homo sapiens]	14	3	3	20	299	32.6	7.9	64.24	3	13.612	0	High
878	15431318	keratin, type I cuticular Ha8 [Homo sapiens]	4	3	2	139	456	50.4	4.84	284.34	3	7.149	0	High
879	4557699	keratin, type I cytoskeletal 12 [Homo sapiens]	7	4	2	166	494	53.5	4.78	431.41	4	18.251	0	High
880	131412225	keratin, type I cytoskeletal 13 isoform a [Homo sapiens]	17	10	2	356	458	49.5	4.96	884.59	10	72.161	0	High
881	15431310	keratin, type I cytoskeletal 14 [Homo sapiens]	61	34	9	864	472	51.6	5.16	2530.16	34	244.525	0	High
882	24430192	keratin, type I cytoskeletal 16 [Homo sapiens]	46	24	7	666	473	51.2	5.05	1796.06	24	111.105	0	High
883	4557888	keratin, type I cytoskeletal 18 [Homo sapiens]	83	50	47	2709	430	48	5.45	9347.11	50	667.084	0	High
884	24234699	keratin, type I cytoskeletal 19 [Homo sapiens]	71	30	14	839	400	44.1	5.14	2389.56	30	193.072	0	High
885	55956899	keratin, type I cytoskeletal 9 [Homo sapiens]	56	26	25	889	623	62	5.24	2999.78	26	207.845	0	High
886	169790853	keratin, type II cuticular Hb1 [Homo sapiens]	26	12	6	209	505	54.9	5.47	621.75	12	67.282	0	High
887	27477127	keratin, type II cuticular Hb2 [Homo sapiens]	6	3	2	36	513	56.6	6.74	103.93	3	8.816	0	High
888	15431316	keratin, type II cuticular Hb4 [Homo sapiens]	12	8	2	194	600	64.8	7.56	485.48	8	32.114	0	High
889	4504935	keratin, type II cuticular Hb5 [Homo sapiens]	15	8	2	119	507	55.8	6.55	357.51	8	37.595	0	High
890	119395750	keratin, type II cytoskeletal 1 [Homo sapiens]	74	51	46	2029	644	66	8.12	6929.41	51	364.905	0	High
891	194018511	keratin, type II cytoskeletal 1b [Homo sapiens]	11	7	4	249	578	61.9	5.99	894.25	7	24.471	0	High
892	47132620	keratin, type II cytoskeletal 2 epidermal [Homo sapiens]	80	49	34	1290	639	65.4	8	4515.94	49	324.278	0	High
893	109148552	keratin, type II cytoskeletal 3 [Homo sapiens]	9	10	2	138	628	64.4	6.48	370.07	10	34.644	0	High
894	331999954	keratin, type II cytoskeletal 4 [Homo sapiens]	13	8	3	236	520	56.1	6.61	646.73	8	30.972	0	High
895	119395754	keratin, type II cytoskeletal 5 [Homo sapiens]	34	25	12	349	590	62.3	7.74	964.89	25	96.084	0	High
896	5031839	keratin, type II cytoskeletal 6A [Homo sapiens]	36	22	2	422	564	60	8	1164.94	22	104.387	0	High
897	119703753	keratin, type II cytoskeletal 6B [Homo sapiens]	35	22	2	406	564	60	8	1147.09	22	100.06	0	High
898	67782365	keratin, type II cytoskeletal 7 [Homo sapiens]	68	44	33	1732	469	51.4	5.48	5124.31	44	314.012	0	High
899	372466572	keratin, type II cytoskeletal 8 isoform 1 [Homo sapiens]	79	53	43	2388	511	56.6	5.43	7127.81	53	444.88	0	High
900	5730027	KH domain-containing, RNA-binding, signal transduction-associated protein 1 isoform 1 [Homo sapiens]	22	5	5	56	443	48.2	8.66	147.91	5	35.637	0	High
901	194306559	kinesin light chain 1 isoform 3 [Homo sapiens]	6	3	3	5	618	69.7	5.88	9.05	3	12.749	0	High
902	4758648	kinesin-1 heavy chain [Homo sapiens]	20	14	14	62	963	109.6	6.51	166.26	14	59.819	0	High
903	7661960	kinetochore-associated protein 1 [Homo sapiens]	1	2	2	4	2209	250.6	5.97	12.74	2	8.142	0	High
904	4504937	kynureninase isoform a [Homo sapiens]	38	13	13	118	465	52.3	7.03	321.93	13	72.379	0	High
905	54607120	lactotransferrin isoform 1 precursor [Homo sapiens]	4	3	3	21	710	78.1	8.12	48.61	3	9.613	0	High
906	118402586	lactoylglutathione lyase [Homo sapiens]	19	4	4	25	184	20.8	5.31	67.09	4	15.488	0	High
907	20070205	ladinin-1 [Homo sapiens]	3	2	2	8	517	57.1	9.67	23.89	2	6.3	0	High
908	27436946	lamin isoform A [Homo sapiens]	67	53	3	1737	664	74.1	7.02	5442.43	53	386.7	0	High
909	37595750	lamin-B receptor [Homo sapiens]	8	5	5	21	615	70.7	9.36	40.28	5	14.246	0	High
910	5031877	lamin-B1 isoform 1 [Homo sapiens]	62	34	32	381	586	66.4	5.16	1189.46	34	177.8	0	High
911	388240801	lamin-B2 [Homo sapiens]	30	18	16	143	620	69.9	5.59	408.89	18	73.782	0	High
912	38045910	laminin subunit alpha-3 isoform 1 precursor [Homo sapiens]	2	5	5	9	3333	366.4	7.24	30.63	5	18.458	0	High
913	167614504	laminin subunit beta-1 precursor [Homo sapiens]	4	5	5	21	1786	197.9	4.94	83.66	5	28.793	0	High
914	62868215	laminin subunit beta-3 precursor [Homo sapiens]	8	7	7	43	1172	129.5	7.21	148.08	7	46.221	0	High
915	145309326	laminin subunit gamma-1 precursor [Homo sapiens]	4	5	5	18	1609	177.5	5.12	74.48	5	26.901	0	High
916	20357568	L-aminoadipate-semialdehyde dehydrogenase-phosphopantetheinyl transferase [Homo sapiens]	7	2	2	4	309	35.8	6.8	12.49	2	7.383	0	High
917	4503243	lanosterol 14-alpha demethylase isoform 1 precursor [Homo sapiens]	12	4	4	11	509	57.2	8.53	30.46	4	15.835	0	High
918	71979932	large neutral amino acids transporter small subunit 1 [Homo sapiens]	24	8	8	107	507	55	7.72	321.58	8	45.535	0	High
919	261337165	latent-transforming growth factor beta-binding protein 1 isoform LTBP-1L precursor [Homo sapiens]	1	2	2	3	1721	186.6	5.96	8.18	2	8.602	0	High
920	31044432	LEM domain-containing protein 2 isoform 1 [Homo sapiens]	6	2	2	3	503	56.9	9	12.28	2	9.781	0	High
921	6912482	LETM1 and EF-hand domain-containing protein 1, mitochondrial precursor [Homo sapiens]	26	14	14	93	739	83.3	6.7	300.54	14	67.455	0	High
922	31621305	leucine-rich PPR motif-containing protein, mitochondrial precursor [Homo sapiens]	55	61	61	658	1394	157.8	6.13	2009.71	61	372.459	0	High
923	24308207	leucine-rich repeat-containing protein 47 [Homo sapiens]	6	2	2	11	583	63.4	8.28	42.51	2	10.995	0	High
924	40254924	leucine-rich repeat-containing protein 59 [Homo sapiens]	34	10	10	208	307	34.9	9.57	531.35	10	63.294	0	High
925	108773810	leucine--tRNA ligase, cytoplasmic [Homo sapiens]	14	14	14	76	1176	134.4	7.3	195.27	14	67.429	0	High
926	61742777	leucyl-cystinyl aminopeptidase isoform 1 [Homo sapiens]	4	3	3	15	1025	117.3	5.73	49.77	3	18.198	0	High
927	4505029	leukotriene A-4 hydrolase isoform 1 [Homo sapiens]	33	14	14	118	611	69.2	6.18	366.13	14	108.996	0	High
928	7657309	LIM and cysteine-rich domains protein 1 isoform 1 [Homo sapiens]	10	2	2	10	365	40.8	7.93	39.5	2	10.873	0	High
929	5453710	LIM and SH3 domain protein 1 isoform a [Homo sapiens]	56	12	12	219	261	29.7	7.05	595.4	12	62.249	0	High
930	165905589	LIM domain and actin-binding protein 1 isoform 1 [Homo sapiens]	3	2	2	5	760	85.2	6.76	12.04	2	4.707	0.001	High
931	68508967	liver carboxylesterase 1 isoform a precursor [Homo sapiens]	39	16	16	65	568	62.6	6.6	165.71	16	65.224	0	High
932	260099723	L-lactate dehydrogenase A chain isoform 3 [Homo sapiens]	76	26	24	656	361	39.8	8.43	1950.5	26	241.58	0	High
933	291575128	L-lactate dehydrogenase B chain [Homo sapiens]	83	23	21	695	334	36.6	6.05	2076.84	23	155.874	0	High
934	21396489	lon protease homolog, mitochondrial isoform 1 precursor [Homo sapiens]	22	16	16	81	959	106.4	6.39	231.27	16	66.718	0	High
935	42794752	long-chain-fatty-acid--CoA ligase 3 [Homo sapiens]	39	19	17	137	720	80.4	8.38	427.49	19	128.271	0	High
936	4757714	low molecular weight phosphotyrosine protein phosphatase isoform c [Homo sapiens]	39	5	5	24	158	18	6.74	55.17	5	21.523	0	High
937	4504975	low-density lipoprotein receptor isoform 1 precursor [Homo sapiens]	7	6	6	24	860	95.3	5.05	75.36	6	30.807	0	High
938	659667952	lupus La protein [Homo sapiens]	47	18	18	198	408	46.8	7.12	641.21	18	106.057	0	High
939	7705925	L-xylulose reductase isoform 1 [Homo sapiens]	20	3	3	8	244	25.9	8.1	24.54	3	11.086	0	High
940	194272210	lysine--tRNA ligase isoform 1 [Homo sapiens]	25	14	14	73	625	71.5	6.81	220.16	14	56.059	0	High
941	663429515	lysophospholipase-like protein 1 isoform a [Homo sapiens]	19	3	3	8	237	26.3	7.84	24.38	3	14.196	0	High
942	225703079	lysophospholipid acyltransferase 7 isoform 1 [Homo sapiens]	7	3	3	6	472	52.7	8.97	9.78	3	9.181	0	High
943	119393893	lysosomal alpha-glucosidase preproprotein [Homo sapiens]	6	3	3	7	952	105.3	6	20.68	3	9.495	0	High
944	119395729	lysosomal protective protein isoform a precursor [Homo sapiens]	10	4	4	11	498	56.2	6.61	22.81	4	22.419	0	High
945	112380628	lysosome-associated membrane glycoprotein 1 precursor [Homo sapiens]	9	3	3	7	417	44.9	8.75	15.89	3	8.57	0	High
946	169790833	lysosome-associated membrane glycoprotein 2 isoform C precursor [Homo sapiens]	5	2	2	2	411	45.1	5.91	5.17	2	6.023	0	High
947	4505185	macrophage migration inhibitory factor [Homo sapiens]	66	3	3	27	115	12.5	7.88	68.97	3	12.513	0	High
948	19913412	major vault protein isoform 1 [Homo sapiens]	35	21	21	138	893	99.3	5.48	423.06	21	104.727	0	High
949	312283701	malate dehydrogenase, cytoplasmic isoform 1 [Homo sapiens]	47	13	13	161	352	38.6	7.71	470.57	13	73.077	0	High
950	21735621	malate dehydrogenase, mitochondrial isoform 1 precursor [Homo sapiens]	64	19	19	681	338	35.5	8.68	2102.48	19	157.638	0	High
951	7661948	malectin precursor [Homo sapiens]	17	4	4	42	292	32.2	5.41	137.97	4	21.048	0	High
952	22202624	maleylacetoacetate isomerase isoform 1 [Homo sapiens]	13	2	2	4	216	24.1	7.71	6.74	2	6.594	0	High
953	345110632	mammalian ependymin-related protein 1 isoform 1 precursor [Homo sapiens]	9	2	2	9	224	25.4	6.6	27.06	2	8.274	0	High
954	149999606	mannosyl-oligosaccharide glucosidase isoform 1 [Homo sapiens]	8	4	4	13	837	91.9	8.9	43.82	4	20.439	0	High
955	13491174	MARCKS-related protein [Homo sapiens]	14	2	2	7	195	19.5	4.67	26.21	2	8.524	0	High
956	303227924	matrin-3 isoform a [Homo sapiens]	40	22	22	331	847	94.6	6.25	1158.77	22	191.777	0	High
957	ABP64734.1	matrix protein 1 [Influenza A virus (A/lvPR8/34(H1N1))]	89	34	34	2504	252	27.9	9.36	7640.98	34	737.954	0	High
958	ABP64725.1	matrix protein 2 [Influenza A virus (A/hvPR8/34(H1N1))]	30	2	2	84	97	11	5.91	204.48	2	10.362	0	High
959	554506556	medium-chain specific acyl-CoA dehydrogenase, mitochondrial isoform d precursor [Homo sapiens]	22	7	7	31	454	50.2	7.8	99.72	7	33.599	0	High
960	5729875	membrane-associated progesterone receptor component 1 isoform 1 [Homo sapiens]	38	5	4	26	195	21.7	4.7	89.22	5	31.766	0	High
961	291621647	membrane-associated progesterone receptor component 2 [Homo sapiens]	28	6	5	71	247	26.2	5.31	255.35	6	35.752	0	High
962	618857509	mesencephalic astrocyte-derived neurotrophic factor precursor [Homo sapiens]	30	4	4	18	185	21.1	8.92	54.52	4	19.299	0	High
963	4507509	metalloproteinase inhibitor 1 precursor [Homo sapiens]	14	3	3	9	207	23.2	8.1	24.08	3	9.855	0	High
964	4507511	metalloproteinase inhibitor 2 precursor [Homo sapiens]	14	2	2	6	220	24.4	7.49	13.12	2	8.347	0	High
965	4507513	metalloproteinase inhibitor 3 precursor [Homo sapiens]	23	5	5	9	211	24.1	8.72	27.3	5	17.938	0	High
966	597955330	metaxin-1 isoform 1 [Homo sapiens]	6	2	2	6	466	51.4	9.79	21.61	2	8.577	0	High
967	5729937	metaxin-2 [Homo sapiens]	16	2	2	3	263	29.7	6.29	11.97	2	9.085	0	High
968	11034825	methionine adenosyltransferase 2 subunit beta isoform 1 [Homo sapiens]	7	2	2	7	334	37.5	7.36	26.35	2	11.467	0	High
969	5803092	methionine aminopeptidase 2 [Homo sapiens]	16	4	4	10	478	52.9	5.82	32.57	4	22.526	0	High
970	14043022	methionine--tRNA ligase, cytoplasmic [Homo sapiens]	14	9	9	40	900	101.1	6.16	141.35	9	43.377	0	High
971	11545863	methylcrotonoyl-CoA carboxylase beta chain, mitochondrial [Homo sapiens]	20	8	8	24	563	61.3	7.68	81.82	8	40.103	0	High
972	4502327	methylglutaconyl-CoA hydratase, mitochondrial precursor [Homo sapiens]	5	2	2	2	339	35.6	9.48	4.58	2	4.389	0.001	High
973	9945306	microsomal glutathione S-transferase 1 isoform a [Homo sapiens]	49	5	5	81	155	17.6	9.39	288.21	5	35.669	0	High
974	153945728	microtubule-associated protein 1B [Homo sapiens]	26	37	37	162	2468	270.5	4.81	420.48	37	205.462	0	High
975	6912494	microtubule-associated protein RP/EB family member 1 [Homo sapiens]	48	9	9	79	268	30	5.14	239.57	9	58.154	0	High
976	23308607	minor histocompatibility antigen H13 isoform 1 [Homo sapiens]	28	6	6	29	377	41.5	6.43	65.96	6	28.452	0	High
977	238814322	mitochondrial 10-formyltetrahydrofolate dehydrogenase precursor [Homo sapiens]	5	4	3	11	923	101.7	6.52	25.45	4	17.011	0	High
978	21361114	mitochondrial 2-oxoglutarate/malate carrier protein isoform 1 [Homo sapiens]	37	10	10	97	314	34	9.91	314.13	10	56.892	0	High
979	83776598	mitochondrial antiviral-signaling protein isoform 1 [Homo sapiens]	25	7	7	38	540	56.5	5.52	109.76	7	42.874	0	High
980	7657347	mitochondrial carrier homolog 2 [Homo sapiens]	15	3	3	15	303	33.3	7.97	53.56	3	21.607	0	High
981	401461821	mitochondrial dicarboxylate carrier isoform 1 [Homo sapiens]	17	3	3	5	296	32.1	9.35	17.46	3	18.231	0	High
982	151108473	mitochondrial fission 1 protein [Homo sapiens]	16	2	2	5	152	16.9	8.79	14.63	2	6.356	0	High
983	300796970	mitochondrial glutamate carrier 1 [Homo sapiens]	9	3	3	3	323	34.4	9.29	7.82	3	8.785	0	High
984	6912708	mitochondrial import inner membrane translocase subunit Tim10 [Homo sapiens]	22	2	2	6	90	10.3	6.29	20.64	2	7.258	0	High
985	11024700	mitochondrial import inner membrane translocase subunit Tim13 [Homo sapiens]	54	4	4	20	95	10.5	8.18	47.54	4	16.186	0	High
986	5454122	mitochondrial import inner membrane translocase subunit Tim23 [Homo sapiens]	18	2	2	32	209	21.9	8.6	111.3	2	22.166	0	High
987	33636719	mitochondrial import inner membrane translocase subunit TIM44 [Homo sapiens]	8	3	3	9	452	51.3	8.32	31.07	3	13.657	0	High
988	48526509	mitochondrial import inner membrane translocase subunit TIM50 [Homo sapiens]	18	6	6	60	456	50.4	9.42	209.33	6	37.783	0	High
989	6912714	mitochondrial import inner membrane translocase subunit Tim9 [Homo sapiens]	38	3	3	15	89	10.4	7.21	33.27	3	10.869	0	High
990	9910382	mitochondrial import receptor subunit TOM22 homolog [Homo sapiens]	51	5	5	53	142	15.5	4.34	216.28	5	41.576	0	High
991	193083122	mitochondrial import receptor subunit TOM40 homolog [Homo sapiens]	44	9	9	42	361	37.9	7.25	125.33	9	42.253	0	High
992	197333730	mitochondrial import receptor subunit TOM5 homolog isoform 3 [Homo sapiens]	20	2	2	4	92	10	6.51	11.13	2	4.675	0.001	High
993	9506859	mitochondrial import receptor subunit TOM7 homolog [Homo sapiens]	55	2	2	22	55	6.2	10.29	66.72	2	11.495	0	High
994	54607135	mitochondrial import receptor subunit TOM70 [Homo sapiens]	19	9	9	59	608	67.4	7.12	188.15	9	43.388	0	High
995	223718097	mitochondrial inner membrane protein OXA1L [Homo sapiens]	3	2	2	2	495	55.2	9.69	2.42	2	3.841	0.001	High
996	156105687	mitochondrial intermediate peptidase [Homo sapiens]	3	2	2	2	713	80.6	7.05	7.11	2	7.759	0	High
997	20270303	mitochondrial Rho GTPase 2 [Homo sapiens]	6	2	2	5	618	68.1	5.86	21.42	2	10.175	0	High
998	94538354	mitochondrial-processing peptidase subunit beta precursor [Homo sapiens]	9	3	3	11	489	54.3	6.83	38.65	3	16.165	0	High
999	66932916	mitogen-activated protein kinase 1 [Homo sapiens]	29	9	6	44	360	41.4	6.98	137.96	9	55.655	0	High
1000	91718899	mitogen-activated protein kinase 3 isoform 1 [Homo sapiens]	13	6	3	15	379	43.1	6.74	41.57	6	23.948	0	High
1001	4757880	mitotic checkpoint protein BUB3 isoform a [Homo sapiens]	35	8	8	46	328	37.1	6.84	114.79	8	42.811	0	High
1002	27735067	mitotic interactor and substrate of PLK1 [Homo sapiens]	21	10	10	61	679	75.3	6.83	178.85	10	63.491	0	High
1003	62243332	mitotic spindle assembly checkpoint protein MAD1 [Homo sapiens]	4	2	2	5	718	83	5.92	12.19	2	7.966	0	High
1004	222352111	MKI67 FHA domain-interacting nucleolar phosphoprotein [Homo sapiens]	18	4	4	15	293	34.2	9.88	52.2	4	21.112	0	High
1005	18490987	mRNA turnover protein 4 homolog [Homo sapiens]	19	3	3	8	239	27.5	8.29	21.56	3	9.376	0	High
1006	301172750	mucin-5B precursor [Homo sapiens]	3	5	3	10	5762	596	6.64	25.63	5	19.504	0	High
1007	134142337	multidrug resistance-associated protein 1 [Homo sapiens]	21	23	22	118	1531	171.5	7.11	399.56	23	120.754	0	High
1008	157502201	multidrug resistance-associated protein 4 isoform 1 [Homo sapiens]	4	4	4	9	1325	149.4	8.19	27.9	4	16.407	0	High
1009	284005455	multiple coagulation factor deficiency protein 2 isoform A precursor [Homo sapiens]	52	3	3	3	146	16.4	4.63	12.06	3	9.695	0	High
1010	157694494	myb-binding protein 1A isoform 1 [Homo sapiens]	22	23	23	163	1332	149.3	9.28	493.18	23	94.543	0	High
1011	8923001	mycophenolic acid acyl-glucuronide esterase, mitochondrial isoform 1 precursor [Homo sapiens]	30	6	6	20	306	33.9	8.57	49.57	6	29.201	0	High
1012	589058153	myeloid-associated differentiation marker [Homo sapiens]	19	4	4	66	322	35.3	8.15	221.89	4	33.051	0	High
1013	17986258	myosin light polypeptide 6 isoform 1 [Homo sapiens]	63	10	10	218	151	16.9	4.65	716.18	10	91.926	0	High
1014	224831241	myosin-14 isoform 3 [Homo sapiens]	6	13	5	163	2036	231.9	5.6	511.9	13	63.614	0	High
1015	12667788	myosin-9 [Homo sapiens]	54	101	86	1666	1960	226.4	5.6	5571.78	101	724.364	0	High
1016	21956645	myotrophin [Homo sapiens]	48	3	3	48	118	12.9	5.52	209.12	3	32.541	0	High
1017	153070260	myristoylated alanine-rich C-kinase substrate [Homo sapiens]	36	5	5	41	332	31.5	4.45	178.42	5	52.696	0	High
1018	6912328	N(G),N(G)-dimethylarginine dimethylaminohydrolase 1 isoform 1 [Homo sapiens]	8	2	2	4	285	31.1	5.81	12.66	2	8.491	0	High
1019	4759140	Na(+)/H(+) exchange regulatory cofactor NHE-RF1 [Homo sapiens]	18	5	5	26	358	38.8	5.77	55.99	5	22.098	0	High
1020	157502212	N-acetylgalactosaminyltransferase 7 [Homo sapiens]	4	2	2	4	657	75.3	7.11	10.25	2	7.693	0	High
1021	4504061	N-acetylglucosamine-6-sulfatase precursor [Homo sapiens]	10	4	4	8	552	62	8.31	25.13	4	18.526	0	High
1022	221316723	N-acetyltransferase 10 isoform a [Homo sapiens]	9	8	8	22	1025	115.6	8.27	63.59	8	27.396	0	High
1023	8923900	N-acylneuraminate cytidylyltransferase [Homo sapiens]	6	2	2	8	434	48.3	7.93	27.98	2	9.701	0	High
1024	122939153	NAD(P) transhydrogenase, mitochondrial [Homo sapiens]	12	8	8	10	1086	113.8	8.09	29.59	8	43.829	0	High
1025	4505415	NAD(P)H dehydrogenase [quinone] 1 isoform a [Homo sapiens]	56	17	17	335	274	30.8	8.88	1078.11	17	101.097	0	High
1026	91984773	NAD(P)H-hydrate epimerase precursor [Homo sapiens]	18	3	3	17	288	31.7	7.66	58.06	3	19.834	0	High
1027	4505145	NAD-dependent malic enzyme, mitochondrial isoform 1 precursor [Homo sapiens]	15	6	6	30	584	65.4	7.61	110.84	6	30.164	0	High
1028	4758768	NADH dehydrogenase [ubiquinone] 1 alpha subcomplex subunit 10, mitochondrial precursor [Homo sapiens]	19	5	5	25	355	40.7	8.48	74.89	5	23.412	0	High
1029	10092657	NADH dehydrogenase [ubiquinone] 1 alpha subcomplex subunit 12 isoform a [Homo sapiens]	28	3	3	8	145	17.1	9.63	19.57	3	14.497	0	High
1030	260763955	NADH dehydrogenase [ubiquinone] 1 alpha subcomplex subunit 13 [Homo sapiens]	30	4	4	23	144	16.7	8.43	66.3	4	14.252	0	High
1031	4505355	NADH dehydrogenase [ubiquinone] 1 alpha subcomplex subunit 2 isoform 1 [Homo sapiens]	40	3	3	23	99	10.9	9.57	61.11	3	19.749	0	High
1032	4505357	NADH dehydrogenase [ubiquinone] 1 alpha subcomplex subunit 4 [Homo sapiens]	37	3	3	17	81	9.4	9.38	48.02	3	8.656	0	High
1033	604723356	NADH dehydrogenase [ubiquinone] 1 alpha subcomplex subunit 5 isoform 6 [Homo sapiens]	19	3	3	21	182	21.2	9.01	63.66	3	12.196	0	High
1034	103472001	NADH dehydrogenase [ubiquinone] 1 alpha subcomplex subunit 7 [Homo sapiens]	25	2	2	10	113	12.5	10.18	26.42	2	13.726	0	High
1035	7657369	NADH dehydrogenase [ubiquinone] 1 alpha subcomplex subunit 8 [Homo sapiens]	12	2	2	6	172	20.1	7.65	6.74	2	4.8	0.001	High
1036	6681764	NADH dehydrogenase [ubiquinone] 1 alpha subcomplex subunit 9, mitochondrial precursor [Homo sapiens]	35	11	11	56	377	42.5	9.8	173.47	11	54.114	0	High
1037	4758774	NADH dehydrogenase [ubiquinone] 1 beta subcomplex subunit 10 [Homo sapiens]	27	4	4	30	172	20.8	8.48	75.85	4	17.683	0	High
1038	20127561	NADH dehydrogenase [ubiquinone] 1 beta subcomplex subunit 11, mitochondrial isoform 1 [Homo sapiens]	31	3	3	12	163	18.4	5.24	44.7	3	12.94	0	High
1039	4505361	NADH dehydrogenase [ubiquinone] 1 beta subcomplex subunit 3 [Homo sapiens]	18	2	2	5	98	11.4	9.2	4.46	2	4.622	0.001	High
1040	6041669	NADH dehydrogenase [ubiquinone] 1 beta subcomplex subunit 4 isoform 1 [Homo sapiens]	30	3	3	32	129	15.2	9.85	95.57	3	24.684	0	High
1041	4826854	NADH dehydrogenase [ubiquinone] 1 beta subcomplex subunit 8, mitochondrial isoform 1 precursor [Homo sapiens]	25	3	3	14	186	21.8	6.8	22.02	3	19.351	0	High
1042	20149568	NADH dehydrogenase [ubiquinone] flavoprotein 1, mitochondrial isoform 1 precursor [Homo sapiens]	31	9	9	39	464	50.8	8.21	114.71	9	42.253	0	High
1043	222080062	NADH dehydrogenase [ubiquinone] flavoprotein 2, mitochondrial precursor [Homo sapiens]	31	7	7	58	249	27.4	8.06	151.22	7	40.098	0	High
1044	48255924	NADH dehydrogenase [ubiquinone] flavoprotein 3, mitochondrial isoform a precursor [Homo sapiens]	8	2	2	7	473	51	9.17	17.73	2	11.809	0	High
1045	4758786	NADH dehydrogenase [ubiquinone] iron-sulfur protein 2, mitochondrial isoform 1 precursor [Homo sapiens]	6	3	3	18	463	52.5	7.55	49.67	3	9.987	0	High
1046	4758788	NADH dehydrogenase [ubiquinone] iron-sulfur protein 3, mitochondrial precursor [Homo sapiens]	26	5	5	49	264	30.2	7.5	178.31	5	35.041	0	High
1047	4505369	NADH dehydrogenase [ubiquinone] iron-sulfur protein 4, mitochondrial precursor [Homo sapiens]	20	3	3	12	175	20.1	10.3	37.34	3	13.475	0	High
1048	251831107	NADH dehydrogenase subunit 1 (mitochondrion) [Homo sapiens]	9	3	3	12	318	35.6	6.55	43.31	3	15.236	0	High
1049	251831116	NADH dehydrogenase subunit 4 (mitochondrion) [Homo sapiens]	14	5	5	14	459	51.5	9.35	46.53	5	22.865	0	High
1050	284448551	NADH-cytochrome b5 reductase 3 isoform 3 [Homo sapiens]	39	9	9	38	334	38.2	6.9	106.31	9	41.212	0	High
1051	316983160	NADH-ubiquinone oxidoreductase 75 kDa subunit, mitochondrial isoform 5 [Homo sapiens]	40	19	19	171	741	80.9	6.64	572.04	19	133.19	0	High
1052	4505143	NADP-dependent malic enzyme [Homo sapiens]	12	4	4	17	572	64.1	6.13	49.08	4	18.12	0	High
1053	384381462	NADPH:adrenodoxin oxidoreductase, mitochondrial isoform 3 precursor [Homo sapiens]	16	5	5	30	534	58.3	7.87	115.53	5	37.365	0	High
1054	127139033	NADPH--cytochrome P450 reductase [Homo sapiens]	26	14	14	61	680	77	5.58	178.72	14	64.42	0	High
1055	10835057	N-alpha-acetyltransferase 10 isoform 1 [Homo sapiens]	7	2	2	14	235	26.4	5.64	36.33	2	6.128	0	High
1056	17149828	N-alpha-acetyltransferase 15, NatA auxiliary subunit [Homo sapiens]	9	5	5	9	866	101.2	7.42	24.71	5	18.477	0	High
1057	45545411	nck-associated protein 1 isoform 2 [Homo sapiens]	3	3	3	9	1134	129.4	6.68	18.24	3	11.985	0	High
1058	42560237	nectin-1 isoform 1 precursor [Homo sapiens]	4	2	2	4	517	57.1	6.1	9.82	2	5.386	0.001	High
1059	112789532	nectin-2 isoform delta precursor [Homo sapiens]	5	2	2	4	538	57.7	4.82	15.89	2	8.767	0	High
1060	222136611	nectin-4 precursor [Homo sapiens]	5	2	2	10	510	55.4	5.38	27.58	2	10.987	0	High
1061	5453760	NEDD8 precursor [Homo sapiens]	31	2	2	4	81	9.1	8.43	11.9	2	15.022	0	High
1062	557357751	NEDD8-activating enzyme E1 regulatory subunit isoform d [Homo sapiens]	10	4	4	15	537	60.5	5.4	44.88	4	16.9	0	High
1063	4507791	NEDD8-conjugating enzyme Ubc12 [Homo sapiens]	36	6	6	39	183	20.9	7.69	101.85	6	22.391	0	High
1064	20070260	negative elongation factor B [Homo sapiens]	3	2	2	3	580	65.7	6.13	7.93	2	5.435	0.001	High
1065	4557707	neural cell adhesion molecule L1 isoform 1 precursor [Homo sapiens]	9	8	8	17	1257	139.9	6.24	45.05	8	31.473	0	High
1066	ABP64723.1	neuraminidase [Influenza A virus (A/hvPR8/34(H1N1))]	35	18	18	597	454	50.1	7.14	1838.03	18	170.523	0	High
1067	14149738	neurolysin, mitochondrial [Homo sapiens]	14	7	7	43	704	80.6	6.64	124.33	7	40.294	0	High
1068	88900491	neutral alpha-glucosidase AB isoform 3 precursor [Homo sapiens]	49	31	31	243	966	109.4	6.24	721.37	31	189.127	0	High
1069	21314632	neutral amino acid transporter A isoform 1 [Homo sapiens]	12	3	3	6	532	55.7	6.25	16.99	3	15.503	0	High
1070	5032093	neutral amino acid transporter B(0) isoform 1 [Homo sapiens]	29	11	11	104	541	56.6	5.48	340.91	11	65.402	0	High
1071	226423947	neutral cholesterol ester hydrolase 1 isoform a [Homo sapiens]	11	4	4	23	448	49.9	7.21	74.42	4	16.332	0	High
1072	50593021	NFU1 iron-sulfur cluster scaffold homolog, mitochondrial isoform 2 [Homo sapiens]	14	3	3	9	254	28.4	5.07	24.35	3	11.205	0	High
1073	51093863	niban-like protein 1 isoform 1 [Homo sapiens]	18	11	11	59	746	84.1	6.19	168.41	11	52.743	0	High
1074	51873031	nicalin precursor [Homo sapiens]	15	6	6	21	563	62.9	6.89	69.97	6	41.396	0	High
1075	24638433	nicastrin isoform 1 precursor [Homo sapiens]	3	2	2	7	709	78.4	5.99	22.24	2	6.893	0	High
1076	5031977	nicotinamide phosphoribosyltransferase precursor [Homo sapiens]	42	14	14	100	491	55.5	7.15	260.73	14	83.066	0	High
1077	66392203	NME1-NME2 protein [Homo sapiens]	71	12	5	323	267	30.1	8.92	842.31	12	101.626	0	High
1078	51944971	nodal modulator 2 isoform 1 precursor [Homo sapiens]	14	12	12	61	1267	139.4	5.76	185.13	12	59.204	0	High
1079	48255933	non-histone chromosomal protein HMG-14 [Homo sapiens]	34	4	4	10	100	10.7	9.6	26.06	4	11.004	0	High
1080	5031749	non-histone chromosomal protein HMG-17 [Homo sapiens]	30	2	2	13	90	9.4	9.99	35.22	2	7.675	0	High
1081	224028244	non-POU domain-containing octamer-binding protein isoform 1 [Homo sapiens]	46	17	16	271	471	54.2	8.95	820.4	17	114.559	0	High
1082	19923233	non-specific lipid-transfer protein isoform 1 proprotein [Homo sapiens]	16	7	7	59	547	59	6.89	177.73	7	34.597	0	High
1083	NP_040984.1	nonstructural protein 1 [Influenza A virus (A/Puerto Rico/8/1934(H1N1))]	84	26	26	1445	230	25.9	6.61	4486.92	26	276.047	0	High
1084	ABP64727.1	nonstructural protein 2 [Influenza A virus (A/hvPR8/34(H1N1))]	78	8	8	92	121	14.4	5.14	269.34	8	44.031	0	High
1085	332078466	NSFL1 cofactor p47 isoform d [Homo sapiens]	33	8	8	45	372	40.8	5.15	153.46	8	64.246	0	High
1086	56676399	N-terminal Xaa-Pro-Lys N-methyltransferase 1 isoform a [Homo sapiens]	15	2	2	4	223	25.4	5.52	1.68	2	12.413	0	High
1087	19923236	nuclear autoantigen Sp-100 isoform 2 [Homo sapiens]	5	3	2	13	879	100.4	8.22	31.88	3	11.204	0	High
1088	27262628	nuclear autoantigenic sperm protein isoform 2 [Homo sapiens]	22	10	10	51	788	85.2	4.3	138.11	10	45.788	0	High
1089	4505343	nuclear cap-binding protein subunit 1 [Homo sapiens]	14	6	6	38	790	91.8	6.43	109.31	6	33.752	0	High
1090	32698730	nuclear fragile X mental retardation-interacting protein 2 [Homo sapiens]	15	6	6	9	695	76.1	8.7	22.33	6	26.068	0	High
1091	13699256	nuclear inhibitor of protein phosphatase 1 isoform alpha [Homo sapiens]	12	3	3	6	351	38.5	7.37	13.13	3	10.977	0	High
1092	5729953	nuclear migration protein nudC [Homo sapiens]	28	8	8	63	331	38.2	5.38	180.37	8	46.889	0	High
1093	9966881	nuclear pore complex protein Nup107 [Homo sapiens]	2	2	2	7	925	106.3	5.43	20.25	2	6.711	0	High
1094	26051235	nuclear pore complex protein Nup133 [Homo sapiens]	9	7	7	35	1156	128.9	5.1	122.01	7	32.508	0	High
1095	503774352	nuclear pore complex protein Nup153 isoform 1 [Homo sapiens]	3	3	3	6	1506	157.2	8.84	18.97	3	12.723	0	High
1096	24430149	nuclear pore complex protein Nup155 isoform 1 [Homo sapiens]	8	9	9	24	1391	155.1	6.16	79.1	9	41.129	0	High
1097	54859722	nuclear pore complex protein Nup160 [Homo sapiens]	8	7	7	21	1436	162	5.5	74.08	7	40.538	0	High
1098	57634534	nuclear pore complex protein Nup205 [Homo sapiens]	8	13	13	34	2012	227.8	6.21	103.64	13	57.565	0	High
1099	301069416	nuclear pore glycoprotein p62 [Homo sapiens]	7	2	2	13	522	53.2	5.31	46.46	2	11.85	0	High
1100	27477134	nuclear pore membrane glycoprotein 210 precursor [Homo sapiens]	11	14	14	66	1887	205	6.81	230.96	14	80.55	0	High
1101	5016090	nuclear receptor subfamily 0 group B member 1 [Homo sapiens]	7	2	2	6	470	51.7	8.07	19	2	7.832	0	High
1102	56118310	nuclear ubiquitous casein and cyclin-dependent kinase substrate 1 [Homo sapiens]	12	3	3	26	243	27.3	5.08	50.13	3	10.897	0	High
1103	34098946	nuclease-sensitive element-binding protein 1 [Homo sapiens]	40	10	5	118	324	35.9	9.88	387.07	10	68.481	0	High
1104	20070228	nucleobindin-1 precursor [Homo sapiens]	33	16	16	76	461	53.8	5.25	200.67	16	73.124	0	High
1105	157694511	nucleolar complex protein 2 homolog [Homo sapiens]	3	2	2	8	749	84.9	5.62	25.49	2	6.015	0	High
1106	20806097	nucleolar complex protein 3 homolog [Homo sapiens]	6	3	3	6	800	92.5	9.17	17.72	3	13.281	0	High
1107	55953087	nucleolar GTP-binding protein 1 [Homo sapiens]	10	6	6	33	634	73.9	9.5	98.73	6	23.884	0	High
1108	7019419	nucleolar GTP-binding protein 2 [Homo sapiens]	4	2	2	6	731	83.6	9.25	20.31	2	8.879	0	High
1109	194394141	nucleolar pre-ribosomal-associated protein 1 [Homo sapiens]	2	2	2	3	2271	254.2	6.47	9.1	2	14.153	0	High
1110	21361468	nucleolar protein 11 [Homo sapiens]	3	2	2	6	719	81.1	6.07	16.51	2	7.721	0	High
1111	55769587	nucleolar protein 14 isoform 1 [Homo sapiens]	4	2	2	11	857	97.6	7.58	27.67	2	18.015	0	High
1112	32483374	nucleolar protein 56 [Homo sapiens]	55	22	22	178	594	66	9.19	561.7	22	134.966	0	High
1113	7706254	nucleolar protein 58 [Homo sapiens]	40	15	15	131	529	59.5	8.92	418.64	15	113.27	0	High
1114	18644728	nucleolar protein 6 alpha isoform [Homo sapiens]	3	2	2	7	1146	127.5	7.64	21.71	2	20.042	0	High
1115	50659095	nucleolar RNA helicase 2 isoform 1 [Homo sapiens]	40	26	24	246	783	87.3	9.28	715.33	26	130.918	0	High
1116	55956788	nucleolin [Homo sapiens]	39	31	31	723	710	76.6	4.7	2076.84	31	157.289	0	High
1117	77695912	nucleolysin TIAR isoform 2 [Homo sapiens]	20	6	3	20	392	43.4	7.99	63.92	6	25.917	0	High
1118	10835063	nucleophosmin isoform 1 [Homo sapiens]	64	19	19	535	294	32.6	4.78	1809.99	19	189.597	0	High
1119	6857818	nucleoplasmin-3 [Homo sapiens]	15	2	2	3	178	19.3	4.63	5.37	2	5.37	0.001	High
1120	26051237	nucleoporin p54 isoform 1 [Homo sapiens]	9	3	3	9	507	55.4	7.02	41.57	3	20.551	0	High
1121	30102928	nucleoporin p58/p45 isoform a [Homo sapiens]	5	2	2	7	599	60.9	9.33	20.9	2	14.435	0	High
1122	61743971	nucleoporin SEH1 isoform 1 [Homo sapiens]	4	2	2	6	421	46.5	7.9	15.81	2	6.057	0	High
1123	ABP64722.1	nucleoprotein [Influenza A virus (A/hvPR8/34(H1N1))]	82	55	6	3872	498	56.1	9.29	11883.2	55	651.131	0	High
1124	NP_040982.1	nucleoprotein [Influenza A virus (A/Puerto Rico/8/1934(H1N1))]	83	54	4	3483	498	56.1	9.2	10536.7	54	623.471	0	High
1125	33149331	nucleoredoxin isoform 1 [Homo sapiens]	10	3	3	9	435	48.4	4.97	27.76	3	10.455	0	High
1126	157739940	nucleoside diphosphate-linked moiety X motif 19, mitochondrial precursor [Homo sapiens]	13	3	3	9	375	42.2	7.64	25.34	3	12.749	0	High
1127	5174613	nucleosome assembly protein 1-like 4 [Homo sapiens]	18	7	6	32	375	42.8	4.69	83.87	7	25.883	0	High
1128	189571677	nudC domain-containing protein 1 isoform 1 [Homo sapiens]	5	2	2	5	583	66.7	5.11	12.46	2	4.911	0.001	High
1129	21687129	nudC domain-containing protein 2 [Homo sapiens]	12	2	2	4	157	17.7	5.07	10.42	2	5.741	0.001	High
1130	58761500	obg-like ATPase 1 isoform 1 [Homo sapiens]	38	10	10	108	396	44.7	7.81	374.88	10	78.098	0	High
1131	269914128	OCIA domain-containing protein 1 isoform 4 [Homo sapiens]	14	3	3	23	250	28.2	7.44	70.42	3	18.865	0	High
1132	62244044	OCIA domain-containing protein 2 isoform 1 [Homo sapiens]	21	3	3	11	154	16.9	9.03	36.27	3	11.926	0	High
1133	9910460	omega-amidase NIT2 [Homo sapiens]	34	6	6	26	276	30.6	7.21	66	6	24.36	0	High
1134	56549107	optineurin [Homo sapiens]	4	2	2	4	577	65.9	5.17	15.11	2	6.994	0	High
1135	148728166	oxidoreductase HTATIP2 isoform a precursor [Homo sapiens]	20	5	5	21	276	30.1	8.38	59.78	5	16.89	0	High
1136	41393599	oxygen-dependent coproporphyrinogen-III oxidase, mitochondrial precursor [Homo sapiens]	6	2	2	9	454	50.1	8.25	20.31	2	9.054	0	High
1137	4505531	oxysterol-binding protein 1 [Homo sapiens]	7	3	3	7	807	89.4	7.3	12.9	3	14.708	0	High
1138	4506031	palmitoyl-protein thioesterase 1 isoform 1 precursor [Homo sapiens]	9	2	2	13	306	34.2	6.52	37.49	2	9.157	0	High
1139	40018640	parafibromin [Homo sapiens]	4	2	2	6	531	60.5	9.61	15.13	2	7.122	0	High
1140	46276863	parathymosin [Homo sapiens]	23	3	3	50	102	11.5	4.16	113.99	3	13.387	0	High
1141	62955042	partitioning defective 6 homolog beta [Homo sapiens]	6	2	2	6	372	41.2	5.58	14.85	2	5.669	0.001	High
1142	14150139	partner of Y14 and mago isoform 1 [Homo sapiens]	16	2	2	5	204	22.6	9.45	7.48	2	9.893	0	High
1143	190014588	PC4 and SFRS1-interacting protein isoform 2 [Homo sapiens]	21	10	10	32	530	60.1	9.13	88.31	10	42.044	0	High
1144	13994151	PDZ and LIM domain protein 1 [Homo sapiens]	42	8	8	71	329	36	7.02	210.14	8	46.178	0	High
1145	5031715	PDZ domain-containing protein GIPC1 isoform 1 [Homo sapiens]	14	3	3	15	333	36	6.28	33.06	3	25.553	0	High
1146	6912582	peflin [Homo sapiens]	8	2	2	7	284	30.4	6.54	25.06	2	8.465	0	High
1147	38683855	pentatricopeptide repeat domain-containing protein 3, mitochondrial precursor [Homo sapiens]	9	4	4	20	689	78.5	6.42	69.39	4	19.937	0	High
1148	10863927	peptidyl-prolyl cis-trans isomerase A [Homo sapiens]	60	11	3	414	165	18	7.81	1260.66	11	123.555	0	High
1149	4758950	peptidyl-prolyl cis-trans isomerase B precursor [Homo sapiens]	58	14	14	391	216	23.7	9.41	1155.23	14	121.192	0	High
1150	4826932	peptidyl-prolyl cis-trans isomerase D [Homo sapiens]	15	6	6	27	370	40.7	7.21	67.33	6	20.372	0	High
1151	5031987	peptidyl-prolyl cis-trans isomerase F, mitochondrial precursor [Homo sapiens]	16	2	2	7	207	22	9.38	37.17	2	10.901	0	High
1152	192448443	peptidyl-prolyl cis-trans isomerase FKBP10 precursor [Homo sapiens]	9	4	4	18	582	64.2	5.62	56.35	4	18.978	0	High
1153	7706131	peptidyl-prolyl cis-trans isomerase FKBP11 isoform 1 precursor [Homo sapiens]	14	4	4	18	201	22.2	9.39	55.96	4	20.619	0	High
1154	17149836	peptidyl-prolyl cis-trans isomerase FKBP1A isoform a [Homo sapiens]	58	3	3	14	108	11.9	8.16	46.44	3	25.625	0	High
1155	17149844	peptidyl-prolyl cis-trans isomerase FKBP2 precursor [Homo sapiens]	37	4	4	40	142	15.6	9.13	128.34	4	29.5	0	High
1156	4503727	peptidyl-prolyl cis-trans isomerase FKBP3 [Homo sapiens]	36	8	8	79	224	25.2	9.28	262.48	8	45.188	0	High
1157	4503729	peptidyl-prolyl cis-trans isomerase FKBP4 [Homo sapiens]	58	19	19	153	459	51.8	5.43	486.52	19	128.623	0	High
1158	224809329	peptidyl-prolyl cis-trans isomerase FKBP5 isoform 1 [Homo sapiens]	11	4	4	13	457	51.2	5.9	51.21	4	22.758	0	High
1159	547235570	peptidyl-prolyl cis-trans isomerase FKBP9 isoform 2 precursor [Homo sapiens]	5	2	2	3	623	69.1	5.31	4.47	2	5.306	0.001	High
1160	5453898	peptidyl-prolyl cis-trans isomerase NIMA-interacting 1 [Homo sapiens]	42	4	4	15	163	18.2	8.82	33.14	4	43.469	0	High
1161	38679892	peptidyl-prolyl cis-trans isomerase NIMA-interacting 4 isoform 1 [Homo sapiens]	15	2	2	6	156	16.6	9.96	21.02	2	10.653	0	High
1162	14277126	peptidyl-prolyl cis-trans isomerase-like 3 isoform PPIL3a [Homo sapiens]	18	3	3	5	165	18.6	7.01	15.91	3	11.066	0	High
1163	255958282	perilipin-3 isoform 1 [Homo sapiens]	35	9	9	77	434	47	5.44	252.44	9	62.635	0	High
1164	48762926	periodic tryptophan protein 2 homolog [Homo sapiens]	6	4	4	9	919	102.4	6.15	31.13	4	18.381	0	High
1165	186972120	peripheral plasma membrane protein CASK isoform 1 [Homo sapiens]	8	5	5	12	921	104.5	6.47	38.57	5	19.247	0	High
1166	45439327	periplakin [Homo sapiens]	7	12	12	43	1756	204.6	5.58	126.11	12	41.374	0	High
1167	32455266	peroxiredoxin-1 [Homo sapiens]	89	25	21	1000	199	22.1	8.13	2649.66	25	263.492	0	High
1168	32189392	peroxiredoxin-2 [Homo sapiens]	12	3	2	149	198	21.9	5.97	373.49	3	19.328	0	High
1169	5453549	peroxiredoxin-4 precursor [Homo sapiens]	38	9	6	168	271	30.5	6.29	401.35	9	54.635	0	High
1170	6912238	peroxiredoxin-5, mitochondrial isoform a precursor [Homo sapiens]	55	8	8	169	214	22	8.57	511.79	8	57.955	0	High
1171	4758638	peroxiredoxin-6 [Homo sapiens]	63	13	13	247	224	25	6.38	661.7	13	86.501	0	High
1172	10190704	peroxisomal 2,4-dienoyl-CoA reductase [Homo sapiens]	14	3	3	6	292	30.8	9.22	20.12	3	12.76	0	High
1173	4505719	peroxisomal membrane protein 11B isoform 1 [Homo sapiens]	7	2	2	2	259	28.4	9.85	5.88	2	5.252	0.001	High
1174	4504505	peroxisomal multifunctional enzyme type 2 isoform 2 [Homo sapiens]	30	17	17	87	736	79.6	8.84	317.59	17	107.398	0	High
1175	41327741	persulfide dioxygenase ETHE1, mitochondrial [Homo sapiens]	14	2	2	26	254	27.9	6.83	88.25	2	23.294	0	High
1176	7657455	pescadillo homolog isoform 1 [Homo sapiens]	13	6	6	21	588	68	7.33	58.25	6	21.37	0	High
1177	9966827	PEST proteolytic signal-containing nuclear protein [Homo sapiens]	27	4	4	22	178	18.9	7.49	61.65	4	15.664	0	High
1178	4758340	phenylalanine--tRNA ligase alpha subunit [Homo sapiens]	28	10	10	41	508	57.5	7.8	130.69	10	52.009	0	High
1179	124028525	phenylalanine--tRNA ligase beta subunit [Homo sapiens]	12	7	7	65	589	66.1	6.84	152.89	7	25.585	0	High
1180	34996489	PH-interacting protein [Homo sapiens]	2	2	2	6	1821	206.5	8.85	12.35	2	6.981	0	High
1181	4505775	phosphate carrier protein, mitochondrial isoform b precursor [Homo sapiens]	37	11	11	319	361	39.9	9.36	857.08	11	72.499	0	High
1182	4505621	phosphatidylethanolamine-binding protein 1 preproprotein [Homo sapiens]	73	11	11	125	187	21	7.53	421.86	11	100.529	0	High
1183	148224884	phosphatidylglycerophosphatase and protein-tyrosine phosphatase 1 isoform 1 [Homo sapiens]	15	2	2	3	201	22.8	9.77	7.94	2	7.303	0	High
1184	5453908	phosphatidylinositol transfer protein alpha isoform [Homo sapiens]	17	3	2	9	270	31.8	6.55	33.23	3	17.866	0	High
1185	546232153	phosphatidylinositol transfer protein beta isoform isoform 3 [Homo sapiens]	36	7	6	18	273	31.7	6.65	52.01	7	38.04	0	High
1186	7662647	phosphatidylserine synthase 1 isoform 1 [Homo sapiens]	6	2	2	2	473	55.5	8.43	7.56	2	9.516	0	High
1187	614458221	phosphoenolpyruvate carboxykinase [GTP], mitochondrial isoform 1 precursor [Homo sapiens]	40	20	20	161	640	70.7	7.62	511.12	20	99.56	0	High
1188	21361621	phosphoglucomutase-1 isoform 1 [Homo sapiens]	31	13	13	49	562	61.4	6.76	154.22	13	66.562	0	High
1189	63055049	phosphoglucomutase-2 [Homo sapiens]	6	3	3	6	612	68.2	6.73	13.59	3	11.055	0	High
1190	4505763	phosphoglycerate kinase 1 [Homo sapiens]	79	32	32	726	417	44.6	8.1	2207.82	32	255.179	0	High
1191	4505753	phosphoglycerate mutase 1 [Homo sapiens]	74	18	18	341	254	28.8	7.18	1043.91	18	206.657	0	High
1192	108796653	phosphoglycolate phosphatase [Homo sapiens]	8	2	2	7	321	34	6.14	16.22	2	7.837	0	High
1193	72534670	phospholipase A-2-activating protein [Homo sapiens]	8	4	4	9	795	87.1	6.37	16.59	4	17.26	0	High
1194	194018537	phosphoribosyl pyrophosphate synthase-associated protein 1 [Homo sapiens]	7	2	2	6	385	42.4	8.47	25.77	2	12.168	0	High
1195	31657129	phosphoribosylformylglycinamidine synthase [Homo sapiens]	9	8	8	27	1338	144.6	5.76	85.23	8	53.486	0	High
1196	17402893	phosphoserine aminotransferase isoform 1 [Homo sapiens]	55	19	19	186	370	40.4	7.66	524.89	19	109.695	0	High
1197	33356174	pinin [Homo sapiens]	7	4	4	31	717	81.6	7.14	90.51	4	22.569	0	High
1198	66363697	pirin [Homo sapiens]	22	6	6	40	290	32.1	6.92	112.87	6	31.438	0	High
1199	148664226	plakophilin-2 isoform 2b [Homo sapiens]	11	5	5	15	881	97.4	9.33	63.91	5	32.516	0	High
1200	10835159	plasminogen activator inhibitor 1 precursor [Homo sapiens]	9	4	4	11	402	45	7.2	26.95	4	10.344	0	High
1201	66346683	plasminogen activator inhibitor 1 RNA-binding protein isoform 3 [Homo sapiens]	37	12	12	124	393	43.1	8.44	397.6	12	47.66	0	High
1202	288915536	plastin-1 [Homo sapiens]	16	8	4	64	629	70.2	5.41	196.96	8	38.417	0	High
1203	209862851	plastin-3 isoform 1 [Homo sapiens]	45	25	21	179	630	70.8	5.6	486.07	25	140.722	0	High
1204	4557741	platelet-activating factor acetylhydrolase IB subunit alpha [Homo sapiens]	23	8	7	38	410	46.6	7.37	116.46	8	39.489	0	High
1205	4505585	platelet-activating factor acetylhydrolase IB subunit beta isoform a [Homo sapiens]	34	4	4	48	229	25.6	5.92	167.91	4	34.517	0	High
1206	225543099	platelet-activating factor acetylhydrolase IB subunit gamma [Homo sapiens]	40	6	6	45	231	25.7	6.84	120.29	6	38.575	0	High
1207	4505895	pleiotropic regulator 1 isoform 1 [Homo sapiens]	7	2	2	9	514	57.2	9.17	30.01	2	19.112	0	High
1208	156523968	poly [ADP-ribose] polymerase 1 [Homo sapiens]	28	20	20	100	1014	113	8.88	258.47	20	71.14	0	High
1209	154813199	poly [ADP-ribose] polymerase 14 [Homo sapiens]	2	2	2	3	1801	202.7	7.18	12.33	2	12.805	0	High
1210	112789550	poly [ADP-ribose] polymerase 4 [Homo sapiens]	3	4	4	7	1724	192.5	5.66	21.97	4	14.527	0	High
1211	4505611	poly(A)-specific ribonuclease PARN isoform 1 [Homo sapiens]	10	5	5	9	639	73.4	6.2	21.82	5	21.885	0	High
1212	222352151	poly(rC)-binding protein 1 [Homo sapiens]	54	13	9	400	356	37.5	7.09	1167.44	13	141.096	0	High
1213	14141168	poly(rC)-binding protein 2 isoform a [Homo sapiens]	59	14	10	299	366	38.6	6.79	860.83	14	113.849	0	High
1214	17978512	poly(U)-binding-splicing factor PUF60 isoform a [Homo sapiens]	22	6	6	63	559	59.8	5.29	243.39	6	56.103	0	High
1215	46367787	polyadenylate-binding protein 1 [Homo sapiens]	36	20	13	317	636	70.6	9.5	969.32	20	127.364	0	High
1216	4758876	polyadenylate-binding protein 2 [Homo sapiens]	34	4	4	15	306	32.7	5.06	40.63	4	27.142	0	High
1217	208431833	polyadenylate-binding protein 4 isoform 1 [Homo sapiens]	25	13	6	136	660	72.3	9.35	463.77	13	75.611	0	High
1218	ABP64720.1	polymerase acidic protein [Influenza A virus (A/hvPR8/34(H1N1))]	47	31	31	364	716	82.5	5.55	1002.64	31	174.573	0	High
1219	ABP64719.1	polymerase basic protein 1 [Influenza A virus (A/hvPR8/34(H1N1))]	40	28	28	332	757	86.5	9.31	996.43	28	147.868	0	High
1220	ABP64718.1	polymerase basic protein 2 [Influenza A virus (A/hvPR8/34(H1N1))]	51	38	38	518	759	86.1	9.54	1701.63	38	235.177	0	High
1221	7661672	polymerase delta-interacting protein 2 isoform 1 [Homo sapiens]	9	3	3	19	368	42	8.63	55.77	3	11.54	0	High
1222	522020125	polymerase delta-interacting protein 3 isoform 3 [Homo sapiens]	16	4	4	11	438	48.1	9.92	29.89	4	25.361	0	High
1223	42734430	polymerase I and transcript release factor [Homo sapiens]	31	13	13	185	390	43.5	5.6	761.29	13	101.832	0	High
1224	40217805	polynucleotide 5'-hydroxyl-kinase NOL9 [Homo sapiens]	5	3	3	7	702	79.2	9.16	17.98	3	11.466	0	High
1225	4758412	polypeptide N-acetylgalactosaminyltransferase 2 precursor [Homo sapiens]	17	7	7	16	571	64.7	8.35	50.37	7	27.25	0	High
1226	349732192	polypyrimidine tract-binding protein 3 isoform 6 [Homo sapiens]	12	3	2	35	558	60.4	9.19	97.57	3	16.003	0	High
1227	188528628	polyribonucleotide nucleotidyltransferase 1, mitochondrial precursor [Homo sapiens]	26	17	17	73	783	85.9	7.77	239.72	17	88.134	0	High
1228	6005794	PRA1 family protein 2 [Homo sapiens]	16	2	2	18	178	19.2	9.19	62.62	2	9.312	0	High
1229	5453704	PRA1 family protein 3 [Homo sapiens]	20	3	3	11	188	21.6	9.77	39.57	3	11.126	0	High
1230	530417885	PREDICTED: 1,25-dihydroxyvitamin D(3) 24-hydroxylase, mitochondrial isoform X1 [Homo sapiens]	23	8	8	26	514	58.8	8.75	62.87	8	34.279	0	High
1231	530389315	PREDICTED: 14-3-3 protein zeta/delta isoform X1 [Homo sapiens]	48	27	20	844	384	42.5	5.22	2703.62	27	246.789	0	High
1232	530397526	PREDICTED: 182 kDa tankyrase-1-binding protein isoform X2 [Homo sapiens]	3	4	4	14	1808	189.4	4.92	36.93	4	20.675	0	High
1233	530401316	PREDICTED: 2'-5'-oligoadenylate synthase 3 isoform X1 [Homo sapiens]	8	6	6	35	1089	121.4	8.44	121.41	6	37.06	0	High
1234	530408953	PREDICTED: 28S ribosomal protein S34, mitochondrial isoform X1 [Homo sapiens]	9	3	3	14	248	28.7	9.86	32.63	3	8.06	0	High
1235	530419680	PREDICTED: 2-amino-3-ketobutyrate coenzyme A ligase, mitochondrial isoform X1 [Homo sapiens]	8	2	2	2	459	49.4	7.8	5.39	2	6.07	0	High
1236	530365927	PREDICTED: 3'(2'),5'-bisphosphate nucleotidase 1 isoform X1 [Homo sapiens]	29	9	9	35	323	35.2	6.05	111.02	9	39.386	0	High
1237	530362739	PREDICTED: 39S ribosomal protein L37, mitochondrial isoform X1 [Homo sapiens]	10	3	3	22	483	54.9	9.42	72.78	3	14.627	0	High
1238	530438702	PREDICTED: 40S ribosomal protein S26-like [Homo sapiens]	44	4	4	114	115	13	11	318.8	4	40.215	0	High
1239	578841990	PREDICTED: 40S ribosomal protein S9 isoform X1 [Homo sapiens]	55	14	14	265	194	22.6	10.65	641.45	14	48.245	0	High
1240	530400558	PREDICTED: 5'-AMP-activated protein kinase subunit gamma-1 isoform X1 [Homo sapiens]	8	2	2	2	368	41.4	8.85	8.73	2	7.904	0	High
1241	578801388	PREDICTED: 60 kDa SS-A/Ro ribonucleoprotein isoform X1 [Homo sapiens]	11	5	5	13	560	63.1	8.38	41.54	5	24.153	0	High
1242	530410545	PREDICTED: 60S ribosomal protein L26 isoform X2 [Homo sapiens]	50	11	11	135	145	17.2	10.55	343.73	11	41.67	0	High
1243	530416988	PREDICTED: 60S ribosomal protein L28 isoform X1 [Homo sapiens]	33	9	9	117	170	19.1	11.46	251.64	9	30.301	0	High
1244	530378053	PREDICTED: 60S ribosomal protein L34 isoform X1 [Homo sapiens]	32	6	6	73	117	13.3	11.47	143.07	6	17.96	0	High
1245	530375912	PREDICTED: 60S ribosomal protein L35a isoform X1 [Homo sapiens]	24	4	4	79	144	16	11.19	150	4	9.196	0	High
1246	530381827	PREDICTED: 60S ribosomal protein L7-like 1 isoform X1 [Homo sapiens]	24	5	5	11	255	29.7	10.52	31.95	5	19.819	0	High
1247	530376503	PREDICTED: 60S ribosomal protein L9 isoform X1 [Homo sapiens]	64	11	11	144	192	21.9	9.95	581.69	11	100.675	0	High
1248	530392189	PREDICTED: 6-phosphofructokinase type C isoform X1 [Homo sapiens]	39	24	21	238	835	90.8	7.11	763.98	24	149.823	0	High
1249	530419267	PREDICTED: 6-phosphofructokinase, liver type isoform X2 [Homo sapiens]	12	6	2	45	803	87.6	7.87	148.67	6	38.775	0	High
1250	530400466	PREDICTED: 6-phosphofructokinase, muscle type isoform X3 [Homo sapiens]	5	4	2	11	883	96.8	8.12	33.94	4	11.814	0	High
1251	530383698	PREDICTED: acetyl-CoA acetyltransferase, cytosolic isoform X1 [Homo sapiens]	17	4	4	19	426	44.6	8.46	67.03	4	34.72	0	High
1252	530365433	PREDICTED: acidic leucine-rich nuclear phosphoprotein 32 family member E isoform X1 [Homo sapiens]	17	4	4	28	286	32.9	3.89	104.68	4	31.516	0	High
1253	578831328	PREDICTED: actin, cytoplasmic 2 isoform X1 [Homo sapiens]	71	39	12	3568	468	51.2	7.2	12327.2	39	678.233	0	High
1254	578813852	PREDICTED: actin-related protein 2/3 complex subunit 1B isoform X2 [Homo sapiens]	22	5	4	42	372	40.9	8.35	129.78	5	34.099	0	High
1255	530391650	PREDICTED: actin-related protein 2/3 complex subunit 5-like protein isoform X1 [Homo sapiens]	34	4	3	28	153	16.9	6.6	88.68	4	19.769	0	High
1256	578835905	PREDICTED: activity-dependent neuroprotector homeobox protein isoform X1 [Homo sapiens]	3	2	2	3	1111	124.6	7.4	7.11	2	11.971	0	High
1257	530366682	PREDICTED: acyl-CoA:lysophosphatidylglycerol acyltransferase 1 isoform X1 [Homo sapiens]	9	3	3	13	403	46.6	9.26	42.45	3	19.247	0	High
1258	578818631	PREDICTED: acyl-CoA-binding domain-containing protein 5 isoform X2 [Homo sapiens]	11	5	5	17	589	66.1	6.61	47.64	5	28.128	0	High
1259	530387052	PREDICTED: acylglycerol kinase, mitochondrial isoform X1 [Homo sapiens]	17	5	5	28	422	47.1	8.09	80.04	5	22.352	0	High
1260	530360807	PREDICTED: acyl-protein thioesterase 2 isoform X1 [Homo sapiens]	32	7	7	27	243	26.1	7.75	78.7	7	32.931	0	High
1261	530390694	PREDICTED: adenylate kinase isoenzyme 1 isoform X1 [Homo sapiens]	48	9	9	37	210	23.4	8.6	118.56	9	46.647	0	High
1262	578827468	PREDICTED: ADP-dependent glucokinase isoform X1 [Homo sapiens]	15	4	4	20	497	54.1	6.2	46.61	4	30.93	0	High
1263	578799092	PREDICTED: agrin isoform X3 [Homo sapiens]	3	5	5	5	2057	216.1	6.44	14.21	5	11.009	0	High
1264	530406978	PREDICTED: A-kinase anchor protein 13 isoform X1 [Homo sapiens]	1	2	2	3	2883	315.2	5.25	7.9	2	6.114	0	High
1265	578822814	PREDICTED: alpha-2-macroglobulin isoform X1 [Homo sapiens]	2	4	4	19	1512	167.4	6.76	46.48	4	11.481	0	High
1266	530375993	PREDICTED: alpha-adducin isoform X1 [Homo sapiens]	5	2	2	10	799	87.6	5.76	28.7	2	13.088	0	High
1267	530367753	PREDICTED: ancient ubiquitous protein 1 isoform X1 [Homo sapiens]	13	4	4	24	467	51	9.41	80.66	4	18.845	0	High
1268	578808738	PREDICTED: annexin A10 isoform X1 [Homo sapiens]	15	5	5	15	347	39.9	5.55	39.5	5	25.315	0	High
1269	530393508	PREDICTED: annexin A11 isoform X1 [Homo sapiens]	23	13	12	125	605	65.6	8.27	356.27	13	55.893	0	High
1270	530410947	PREDICTED: AP-2 complex subunit beta isoform X2 [Homo sapiens]	32	25	14	129	951	105.6	5.34	375.6	25	127.397	0	High
1271	530415669	PREDICTED: AP-2 complex subunit sigma isoform X1 [Homo sapiens]	12	2	2	15	158	18.9	7.81	34.2	2	13.384	0	High
1272	578819255	PREDICTED: AP-3 complex subunit mu-1 isoform X1 [Homo sapiens]	8	2	2	4	418	46.9	6.93	15.71	2	10.304	0	High
1273	578820896	PREDICTED: apoptosis inhibitor 5 isoform X1 [Homo sapiens]	17	8	8	50	509	57.3	6.09	143.56	8	36.374	0	High
1274	578804211	PREDICTED: arf-GAP domain and FG repeat-containing protein 1 isoform X2 [Homo sapiens]	17	5	5	13	602	62.6	8.56	37.36	5	37.588	0	High
1275	578802587	PREDICTED: arf-GAP with SH3 domain, ANK repeat and PH domain-containing protein 2 isoform X4 [Homo sapiens]	2	2	2	14	970	107.7	6.98	37.82	2	7.734	0	High
1276	530401729	PREDICTED: arginine/serine-rich coiled-coil protein 2 isoform X1 [Homo sapiens]	8	2	2	3	435	50.6	11.33	10.09	2	8.357	0	High
1277	530368805	PREDICTED: ashwin isoform X2 [Homo sapiens]	10	2	2	4	270	30.2	10.1	11.59	2	6.5	0	High
1278	530388427	PREDICTED: aspartyl/asparaginyl beta-hydroxylase isoform X1 [Homo sapiens]	42	23	23	307	773	87.6	5.03	944.91	23	164.942	0	High
1279	530407503	PREDICTED: ataxin-2-like protein isoform X2 [Homo sapiens]	6	4	4	10	1104	116.3	8.66	16.18	4	17.383	0	High
1280	530362759	PREDICTED: ATP synthase F(0) complex subunit B1, mitochondrial isoform X1 [Homo sapiens]	22	8	8	81	403	44.4	9.33	263.77	8	38.788	0	High
1281	578813848	PREDICTED: ATP-binding cassette sub-family F member 2 isoform X2 [Homo sapiens]	6	3	3	16	634	72.4	7.49	53.66	3	18.206	0	High
1282	530412282	PREDICTED: ATP-citrate synthase isoform X1 [Homo sapiens]	36	34	34	387	1155	126.1	8.18	1142.32	34	221.361	0	High
1283	530399347	PREDICTED: ATP-dependent DNA helicase Q1 isoform X4 [Homo sapiens]	25	12	12	58	649	73.4	7.88	179.64	12	67.03	0	High
1284	578830314	PREDICTED: ATP-dependent RNA helicase DDX42 isoform X1 [Homo sapiens]	5	3	3	12	938	102.9	7.02	37.16	3	17.785	0	High
1285	578835852	PREDICTED: band 4.1-like protein 1 isoform X12 [Homo sapiens]	7	4	4	13	881	98.4	5.62	33.52	4	14.703	0	High
1286	530383411	PREDICTED: band 4.1-like protein 2 isoform X1 [Homo sapiens]	4	3	3	6	1113	124.3	5.4	12.74	3	12.822	0	High
1287	578798995	PREDICTED: basement membrane-specific heparan sulfate proteoglycan core protein isoform X6 [Homo sapiens]	3	9	9	19	4579	488.8	6.55	57.94	9	38.757	0	High
1288	578813451	PREDICTED: basic leucine zipper and W2 domain-containing protein 2 isoform X2 [Homo sapiens]	19	6	5	39	419	48.1	6.68	98.91	6	28.832	0	High
1289	530406197	PREDICTED: beta-2-microglobulin isoform X1 [Homo sapiens]	34	3	3	25	122	14	7.44	78.16	3	18.631	0	High
1290	530410063	PREDICTED: beta-enolase isoform X1 [Homo sapiens]	34	10	4	375	443	48	8.16	1300.32	10	126.877	0	High
1291	578808374	PREDICTED: biorientation of chromosomes in cell division protein 1-like 1 isoform X3 [Homo sapiens]	1	2	2	3	3112	337.1	5.15	10.01	2	7.343	0	High
1292	530366063	PREDICTED: BRO1 domain-containing protein BROX isoform X1 [Homo sapiens]	11	3	3	11	464	51.8	8.46	38.06	3	15.484	0	High
1293	530368092	PREDICTED: CAD protein isoform X1 [Homo sapiens]	14	22	22	75	2242	244.6	6.52	214.71	22	110.535	0	High
1294	530378226	PREDICTED: calcium/calmodulin-dependent protein kinase type II subunit delta isoform X1 [Homo sapiens]	20	7	7	36	533	60	7.27	112.05	7	34.629	0	High
1295	578813862	PREDICTED: calcium-binding mitochondrial carrier protein Aralar2 isoform X1 [Homo sapiens]	24	13	8	77	687	75.5	8.5	284.33	13	71.704	0	High
1296	530407863	PREDICTED: calcium-regulated heat stable protein 1 isoform X1 [Homo sapiens]	21	3	3	22	168	18.1	8.85	51.22	3	17.14	0	High
1297	578826144	PREDICTED: calmodulin isoform X1 [Homo sapiens]	47	10	10	308	150	17	4.22	989.02	10	94.22	0	High
1298	530417333	PREDICTED: calpain small subunit 1 isoform X1 [Homo sapiens]	40	8	8	77	322	33.8	6.23	230.72	8	57.078	0	High
1299	578810573	PREDICTED: calpastatin isoform X1 [Homo sapiens]	19	8	8	47	791	84.9	5.36	126.75	8	59.268	0	High
1300	530401713	PREDICTED: CAP-Gly domain-containing linker protein 1 isoform X1 [Homo sapiens]	2	2	2	5	1440	162.4	5.36	12.41	2	7.74	0	High
1301	530396298	PREDICTED: carnitine O-palmitoyltransferase 1, liver isoform isoform X1 [Homo sapiens]	11	7	7	24	805	91.8	8.5	46.63	7	28.657	0	High
1302	578810148	PREDICTED: catenin alpha-1 isoform X4 [Homo sapiens]	57	36	30	225	906	100	6.29	775.75	36	224.599	0	High
1303	530390549	PREDICTED: cathepsin L1 isoform X1 [Homo sapiens]	11	2	2	7	333	37.5	5.45	12.5	2	10.791	0	High
1304	530383018	PREDICTED: CD109 antigen isoform X1 [Homo sapiens]	5	7	7	33	1445	161.6	5.85	95.84	7	27.517	0	High
1305	530396004	PREDICTED: CD44 antigen isoform X1 [Homo sapiens]	10	7	7	132	743	81.6	5.33	358.93	7	50.474	0	High
1306	578819630	PREDICTED: CDGSH iron-sulfur domain-containing protein 1 isoform X1 [Homo sapiens]	15	2	2	8	150	17.2	9.06	28.47	2	7.381	0	High
1307	530407452	PREDICTED: CDP-diacylglycerol--inositol 3-phosphatidyltransferase isoform X1 [Homo sapiens]	11	2	2	6	237	25.9	8.22	17.58	2	12.031	0	High
1308	530416195	PREDICTED: charged multivesicular body protein 2a isoform X2 [Homo sapiens]	13	3	3	6	265	29.6	6	10.95	3	12.648	0	High
1309	530364556	PREDICTED: chromatin target of PRMT1 protein isoform X1 [Homo sapiens]	10	2	2	9	277	29.3	11.99	32.03	2	12.291	0	High
1310	578822553	PREDICTED: chromodomain-helicase-DNA-binding protein 4 isoform X2 [Homo sapiens]	2	3	3	8	1940	220.7	5.97	28.11	3	10.348	0	High
1311	530413055	PREDICTED: C-Jun-amino-terminal kinase-interacting protein 4 isoform X2 [Homo sapiens]	5	3	3	6	1334	147.5	5.19	16.74	3	14.335	0	High
1312	530411491	PREDICTED: clathrin heavy chain 1 isoform X2 [Homo sapiens]	57	74	74	811	1682	192.3	5.69	2621.25	74	515.549	0	High
1313	530399640	PREDICTED: cleavage and polyadenylation specificity factor subunit 6 isoform X1 [Homo sapiens]	12	4	4	31	589	63.6	7.97	95.9	4	29.861	0	High
1314	578821738	PREDICTED: cleavage and polyadenylation specificity factor subunit 7 isoform X7 [Homo sapiens]	12	4	4	21	514	56.3	8.87	65.27	4	23.756	0	High
1315	578810003	PREDICTED: cleft lip and palate transmembrane protein 1-like protein isoform X1 [Homo sapiens]	9	3	3	6	565	65	8.7	20.61	3	14.286	0	High
1316	578815184	PREDICTED: clusterin isoform X1 [Homo sapiens]	14	6	6	27	501	57.8	6.68	73.21	6	26.787	0	High
1317	530380817	PREDICTED: complexin-2 isoform X1 [Homo sapiens]	39	3	3	67	134	15.4	5.08	178.48	3	31.827	0	High
1318	530413484	PREDICTED: COP9 signalosome complex subunit 1 isoform X1 [Homo sapiens]	9	3	3	6	585	65	6.28	18.54	3	12.61	0	High
1319	530427319	PREDICTED: C-terminal-binding protein 1 isoform X3 [Homo sapiens]	6	3	2	7	441	47.6	6.77	17.85	3	8.048	0	High
1320	530361940	PREDICTED: CTP synthase 1 isoform X2 [Homo sapiens]	20	9	8	64	591	66.6	6.46	190.73	9	47.03	0	High
1321	578820279	PREDICTED: CUGBP Elav-like family member 1 isoform X6 [Homo sapiens]	3	2	2	4	523	56	8.46	11.29	2	5.413	0.001	High
1322	530387140	PREDICTED: cullin-1 isoform X1 [Homo sapiens]	7	4	4	10	776	89.6	8	29.01	4	16.241	0	High
1323	530422563	PREDICTED: cullin-4B isoform X1 [Homo sapiens]	5	3	2	7	915	104.1	7.52	18.39	3	8.927	0	High
1324	578820047	PREDICTED: cyclin-dependent kinase 1 isoform X3 [Homo sapiens]	34	8	7	47	297	34.1	8.4	138.53	8	37.521	0	High
1325	578800151	PREDICTED: cyclin-dependent kinase 11B isoform X2 [Homo sapiens]	3	2	2	12	795	92.6	5.54	30.61	2	6.751	0	High
1326	578816513	PREDICTED: cytoplasmic aconitate hydratase isoform X2 [Homo sapiens]	7	5	5	9	897	99.3	6.68	28.39	5	20.083	0	High
1327	530369962	PREDICTED: cytoplasmic dynein 1 intermediate chain 2 isoform X4 [Homo sapiens]	12	4	4	14	632	70.6	5.24	34.92	4	20.617	0	High
1328	578832592	PREDICTED: cytosolic non-specific dipeptidase isoform X3 [Homo sapiens]	37	10	10	47	475	52.8	5.97	117.13	10	48.938	0	High
1329	530403978	PREDICTED: dehydrogenase/reductase SDR family member 7 isoform X1 [Homo sapiens]	12	5	5	13	472	51.8	8.54	38.95	5	18.836	0	High
1330	578819671	PREDICTED: delta-1-pyrroline-5-carboxylate synthase isoform X1 [Homo sapiens]	30	19	19	92	795	87.2	7.12	305.24	19	93.969	0	High
1331	530405491	PREDICTED: deoxyuridine 5'-triphosphate nucleotidohydrolase, mitochondrial isoform X1 [Homo sapiens]	18	4	4	16	263	28.2	9.89	54.01	4	15.892	0	High
1332	530399852	PREDICTED: diacylglycerol kinase alpha isoform X1 [Homo sapiens]	3	2	2	4	773	87.1	7.4	7.25	2	5.084	0.001	High
1333	530411017	PREDICTED: DNA ligase 3 isoform X1 [Homo sapiens]	2	2	2	4	1018	114	9.09	13.68	2	10.795	0	High
1334	530373069	PREDICTED: DNA topoisomerase 2-beta isoform X1 [Homo sapiens]	12	15	8	51	1626	183.2	8	129.73	15	53.158	0	High
1335	530374184	PREDICTED: dnaJ homolog subfamily C member 13 isoform X1 [Homo sapiens]	2	3	3	4	2248	254.9	6.74	7.5	3	11.738	0	High
1336	578831332	PREDICTED: dnaJ homolog subfamily C member 7 isoform X1 [Homo sapiens]	4	2	2	2	513	58.7	7.36	2.34	2	6.875	0	High
1337	530418498	PREDICTED: dolichol-phosphate mannosyltransferase isoform X1 [Homo sapiens]	28	6	6	28	287	32.4	9.13	85.53	6	31.214	0	High
1338	530418269	PREDICTED: dolichyl-diphosphooligosaccharide--protein glycosyltransferase subunit 2 isoform X1 [Homo sapiens]	28	12	12	168	647	71.1	5.97	658.92	12	93.737	0	High
1339	578836171	PREDICTED: double-stranded RNA-binding protein Staufen homolog 1 isoform X7 [Homo sapiens]	16	7	7	27	583	63.8	9.47	56.16	7	33.834	0	High
1340	578800406	PREDICTED: double-stranded RNA-specific adenosine deaminase isoform X1 [Homo sapiens]	13	11	2	52	1236	137.1	8.57	143.01	11	59.995	0	High
1341	530380877	PREDICTED: drebrin isoform X1 [Homo sapiens]	9	3	3	4	695	76.3	4.51	9.35	3	15.796	0	High
1342	530426041	PREDICTED: D-tyrosyl-tRNA(Tyr) deacylase 1 isoform X1 [Homo sapiens]	20	2	2	11	213	24	7.42	28.97	2	8.007	0	High
1343	530390646	PREDICTED: dynamin-1 isoform X1 [Homo sapiens]	12	7	3	40	868	97.6	7.34	99.43	7	31.502	0	High
1344	530418431	PREDICTED: dynein light chain roadblock-type 1 isoform X1 [Homo sapiens]	23	2	2	15	121	13.4	10.08	41.98	2	10.642	0	High
1345	530382418	PREDICTED: dystonin isoform X1 [Homo sapiens]	0	2	2	6	7818	887.8	5.35	14.3	2	7.91	0	High
1346	530368768	PREDICTED: E3 SUMO-protein ligase RanBP2 isoform X1 [Homo sapiens]	7	15	15	59	3258	361.8	6.23	184.86	15	76.024	0	High
1347	530426346	PREDICTED: E3 ubiquitin-protein ligase HUWE1 isoform X2 [Homo sapiens]	4	10	10	22	4374	481.6	5.22	72.26	10	58.527	0	High
1348	578831186	PREDICTED: E3 ubiquitin-protein ligase RNF213 isoform X1 [Homo sapiens]	9	31	31	87	5256	596.1	6.42	291.93	31	167.713	0	High
1349	530371165	PREDICTED: E3 ubiquitin-protein ligase TRIP12 isoform X1 [Homo sapiens]	1	2	2	4	2068	228.4	8.6	14.48	2	8.717	0	High
1350	530360958	PREDICTED: E3 ubiquitin-protein ligase UBR4 isoform X5 [Homo sapiens]	2	6	6	19	5223	577.7	6	54.28	6	36.814	0	High
1351	578824308	PREDICTED: early endosome antigen 1 isoform X1 [Homo sapiens]	2	2	2	2	1465	167.8	5.66	4.47	2	6.52	0	High
1352	578821249	PREDICTED: EH domain-binding protein 1-like protein 1 isoform X6 [Homo sapiens]	1	2	2	2	1535	163	4.87	5.12	2	5.15	0.001	High
1353	530388819	PREDICTED: elongation factor 1-delta isoform X1 [Homo sapiens]	26	15	13	244	688	75.6	6.43	763.6	15	98.289	0	High
1354	578799206	PREDICTED: endophilin-B1 isoform X1 [Homo sapiens]	6	2	2	2	402	45.2	6.21	6.32	2	7.867	0	High
1355	578836019	PREDICTED: endoplasmic reticulum-Golgi intermediate compartment protein 3 isoform X1 [Homo sapiens]	5	2	2	6	389	43.8	6.06	18.85	2	7.14	0	High
1356	530399079	PREDICTED: epidermal growth factor receptor kinase substrate 8 isoform X1 [Homo sapiens]	8	4	4	12	833	93.1	7.5	35.7	4	18.933	0	High
1357	530416759	PREDICTED: epidermal growth factor receptor kinase substrate 8-like protein 1 isoform X1 [Homo sapiens]	4	3	3	7	755	83.9	6.52	17.48	3	6.486	0	High
1358	578820683	PREDICTED: epidermal growth factor receptor kinase substrate 8-like protein 2 isoform X1 [Homo sapiens]	8	5	5	20	715	80.6	6.84	40.79	5	17.573	0	High
1359	578825417	PREDICTED: epididymal secretory protein E1 isoform X1 [Homo sapiens]	22	2	2	5	174	19.2	8.44	12.79	2	9.025	0	High
1360	530360927	PREDICTED: ER membrane protein complex subunit 1 isoform X1 [Homo sapiens]	11	7	7	22	996	112	7.66	65.15	7	34.39	0	High
1361	530387547	PREDICTED: erlin-2 isoform X1 [Homo sapiens]	21	7	5	36	451	49.9	7.39	115.82	7	36.791	0	High
1362	530399910	PREDICTED: eukaryotic translation initiation factor 4B isoform X1 [Homo sapiens]	7	4	4	32	616	69.7	5.67	81.94	4	13.011	0	High
1363	530386279	PREDICTED: exocyst complex component 4 isoform X4 [Homo sapiens]	5	2	2	17	485	55.2	7.34	40.78	2	14.695	0	High
1364	530360595	PREDICTED: exosome component 10 isoform X1 [Homo sapiens]	5	3	3	10	914	103.9	8.75	27.79	3	12.254	0	High
1365	530397186	PREDICTED: FACT complex subunit SSRP1 isoform X1 [Homo sapiens]	21	11	11	61	712	81.4	7.01	165.73	11	54.353	0	High
1366	530425477	PREDICTED: far upstream element-binding protein 2 isoform X1 [Homo sapiens]	43	19	18	157	747	76.6	7.33	468.8	19	112.668	0	High
1367	530375267	PREDICTED: F-box-like/WD repeat-containing protein TBL1XR1 isoform X1 [Homo sapiens]	8	3	3	6	524	56.5	5.97	17.51	3	11.605	0	High
1368	578825426	PREDICTED: fermitin family homolog 2 isoform X2 [Homo sapiens]	3	2	2	2	706	80.7	6.95	4.94	2	4.982	0.001	High
1369	530402958	PREDICTED: fibulin-5 isoform X1 [Homo sapiens]	4	2	2	4	465	52.4	4.86	10.98	2	7.432	0	High
1370	530429490	PREDICTED: flotillin-1 isoform X1 [Homo sapiens]	29	9	9	36	427	47.3	7.49	137.76	9	54.046	0	High
1371	530368558	PREDICTED: four and a half LIM domains protein 2 isoform X1 [Homo sapiens]	7	2	2	9	395	44.8	8.06	22.68	2	9.682	0	High
1372	530410965	PREDICTED: fructose-bisphosphate aldolase C isoform X1 [Homo sapiens]	19	7	3	126	451	48.4	8.21	560.95	7	69.633	0	High
1373	578804414	PREDICTED: fumarylacetoacetate hydrolase domain-containing protein 2A isoform X1 [Homo sapiens]	8	2	2	4	314	34.6	8.24	11.87	2	7.349	0	High
1374	578837580	PREDICTED: gamma-glutamyltranspeptidase 2 isoform X15 [Homo sapiens]	4	2	2	7	574	62.2	7.02	18.38	2	12.014	0	High
1375	530364640	PREDICTED: gamma-interferon-inducible protein 16 isoform X1 [Homo sapiens]	4	3	3	9	789	88.6	9.29	22.52	3	8.035	0	High
1376	530394173	PREDICTED: gamma-synuclein isoform X1 [Homo sapiens]	5	2	2	5	277	29.1	6.44	19.9	2	9.517	0	High
1377	530389295	PREDICTED: GDP-L-fucose synthase isoform X1 [Homo sapiens]	9	4	4	20	504	54.4	8.69	52.46	4	11.916	0	High
1378	578817383	PREDICTED: gelsolin isoform X7 [Homo sapiens]	8	5	5	55	820	89.5	6.57	181.87	5	25.27	0	High
1379	530427257	PREDICTED: general transcription factor 3C polypeptide 5 isoform X1 [Homo sapiens]	5	2	2	2	537	59.7	9.48	2.19	2	5.125	0.001	High
1380	530385788	PREDICTED: general transcription factor II-I isoform X1 [Homo sapiens]	15	12	12	53	1010	113.9	6.74	174.93	12	54.655	0	High
1381	530403534	PREDICTED: glia maturation factor beta isoform X1 [Homo sapiens]	14	2	2	6	143	16.8	5.29	15.94	2	7.775	0	High
1382	578826075	PREDICTED: glucosamine 6-phosphate N-acetyltransferase isoform X2 [Homo sapiens]	14	2	2	9	184	20.7	7.99	31.06	2	9.363	0	High
1383	530380347	PREDICTED: glucosamine-6-phosphate isomerase 1 isoform X1 [Homo sapiens]	13	3	3	7	318	36.1	7.61	24.2	3	16.266	0	High
1384	578833384	PREDICTED: glucosidase 2 subunit beta isoform X1 [Homo sapiens]	32	13	13	159	543	61.2	4.46	510.73	13	76.314	0	High
1385	530362455	PREDICTED: glutathione S-transferase Mu 5 isoform X1 [Homo sapiens]	12	2	2	5	218	25.7	7.39	14.58	2	8.438	0	High
1386	530418095	PREDICTED: glutathione synthetase isoform X2 [Homo sapiens]	27	10	10	26	474	52.4	5.92	77.78	10	34.516	0	High
1387	530412340	PREDICTED: glycylpeptide N-tetradecanoyltransferase 1 isoform X2 [Homo sapiens]	8	3	3	13	521	59.3	8.44	38.62	3	12.588	0	High
1388	578819967	PREDICTED: Golgi-specific brefeldin A-resistance guanine nucleotide exchange factor 1 isoform X2 [Homo sapiens]	2	2	2	3	1893	210.2	5.78	8.6	2	8.665	0	High
1389	530416930	PREDICTED: GRAM domain-containing protein 1A isoform X1 [Homo sapiens]	5	3	3	9	846	92.6	7.77	22.35	3	11.82	0	High
1390	530376963	PREDICTED: G-rich sequence factor 1 isoform X1 [Homo sapiens]	9	3	3	13	561	61.5	7.5	25.03	3	17.889	0	High
1391	578824728	PREDICTED: heat shock protein 105 kDa isoform X3 [Homo sapiens]	20	12	11	75	913	103.1	6.25	229.94	12	57.226	0	High
1392	530381931	PREDICTED: heat shock protein HSP 90-beta isoform X1 [Homo sapiens]	66	55	32	1653	724	83.2	5.03	4934.52	55	447.238	0	High
1393	578831012	PREDICTED: hematological and neurological expressed 1 protein isoform X1 [Homo sapiens]	38	3	3	20	185	19.4	8.48	75.86	3	17.385	0	High
1394	530361113	PREDICTED: heterochromatin protein 1-binding protein 3 isoform X3 [Homo sapiens]	31	16	16	110	553	61.2	9.67	286.61	16	58.555	0	High
1395	530381015	PREDICTED: heterogeneous nuclear ribonucleoprotein H isoform X1 [Homo sapiens]	35	11	6	349	472	51.2	6.8	1307.52	11	101.951	0	High
1396	578819373	PREDICTED: heterogeneous nuclear ribonucleoprotein H3 isoform X8 [Homo sapiens]	33	7	7	135	346	36.9	6.87	471.56	7	81.136	0	High
1397	530415584	PREDICTED: heterogeneous nuclear ribonucleoprotein U-like protein 1 isoform X1 [Homo sapiens]	22	12	12	71	866	96.8	6.92	182.75	12	49.008	0	High
1398	530384720	PREDICTED: heterogeneous nuclear ribonucleoproteins A2/B1 isoform X1 [Homo sapiens]	65	26	24	943	353	37.4	8.95	2705.01	26	240.662	0	High
1399	530393496	PREDICTED: hexokinase-1 isoform X1 [Homo sapiens]	18	14	13	66	960	106.9	6.98	197.72	14	67.168	0	High
1400	530402316	PREDICTED: high mobility group protein B1 isoform X3 [Homo sapiens]	44	13	10	146	215	24.9	5.74	507.28	13	115.533	0	High
1401	530422764	PREDICTED: high mobility group protein B3 isoform X1 [Homo sapiens]	18	3	3	36	222	25.6	8.12	116.67	3	22.48	0	High
1402	530366913	PREDICTED: hippocalcin-like protein 1 isoform X2 [Homo sapiens]	24	4	4	11	193	22.3	5.35	22.92	4	12.573	0	High
1403	578816758	PREDICTED: histidine triad nucleotide-binding protein 2, mitochondrial isoform X1 [Homo sapiens]	36	4	4	12	165	17.8	8.03	32.97	4	19.355	0	High
1404	530381854	PREDICTED: histone H2B type 1-D isoform X1 [Homo sapiens]	53	17	5	737	150	16.3	10.32	2160.73	17	148.654	0	High
1405	578842189	PREDICTED: HLA class I histocompatibility antigen, A-26 alpha chain isoform X1 [Homo sapiens]	12	3	2	15	394	44.4	6.2	55.62	3	16.686	0	High
1406	578839603	PREDICTED: HLA class I histocompatibility antigen, alpha chain G isoform X1 [Homo sapiens]	11	2	2	4	346	38.9	5.83	12.96	2	3.794	0.002	High
1407	578800920	PREDICTED: hornerin isoform X1 [Homo sapiens]	10	5	5	14	2146	213.3	9.86	34.92	5	21.304	0	High
1408	530422762	PREDICTED: host cell factor 1 isoform X1 [Homo sapiens]	10	11	11	33	2036	208.7	7.46	79.87	11	50.807	0	High
1409	530397767	PREDICTED: hypoxia up-regulated protein 1 isoform X5 [Homo sapiens]	30	22	22	182	1000	111.3	5.22	687.45	22	159.663	0	High
1410	530423356	PREDICTED: importin-5 isoform X5 [Homo sapiens]	32	28	26	181	1115	125.5	4.92	574.53	28	186.953	0	High
1411	530424405	PREDICTED: inactive hydroxysteroid dehydrogenase-like protein 1 isoform X1 [Homo sapiens]	7	2	2	10	330	37	8.72	40.31	2	16.855	0	High
1412	578835409	PREDICTED: inosine triphosphate pyrophosphatase isoform X1 [Homo sapiens]	11	3	3	25	238	26.3	9.06	63.57	3	10.472	0	High
1413	578806039	PREDICTED: inosine-5'-monophosphate dehydrogenase 2 isoform X1 [Homo sapiens]	30	17	17	107	608	66.1	8.5	300.22	17	69.208	0	High
1414	578811671	PREDICTED: inositol 1,4,5-trisphosphate receptor type 3 isoform X1 [Homo sapiens]	4	7	7	21	2700	307	6.51	61.17	7	38.217	0	High
1415	578830851	PREDICTED: integrin beta-4 isoform X5 [Homo sapiens]	10	15	15	64	1910	211.6	6.35	181.54	15	71.743	0	High
1416	530395319	PREDICTED: integrin-linked protein kinase isoform X3 [Homo sapiens]	9	3	3	16	452	51.4	8.07	46.73	3	12.746	0	High
1417	578836544	PREDICTED: interferon-induced GTP-binding protein Mx1 isoform X6 [Homo sapiens]	24	10	10	43	685	78.4	6.35	142.11	10	60.877	0	High
1418	530404494	PREDICTED: inverted formin-2 isoform X1 [Homo sapiens]	9	7	7	18	1281	139	5.57	49.14	7	41.816	0	High
1419	530425723	PREDICTED: isocitrate dehydrogenase [NAD] subunit beta, mitochondrial isoform X1 [Homo sapiens]	22	7	7	36	387	42.4	8.46	126.15	7	38.259	0	High
1420	530412116	PREDICTED: junction plakoglobin isoform X1 [Homo sapiens]	48	25	19	119	783	85.6	6.34	383.37	25	126.487	0	High
1421	530412176	PREDICTED: keratin, type I cytoskeletal 10 isoform X1 [Homo sapiens]	60	39	32	1740	624	63.3	5.26	5460.91	39	321.346	0	High
1422	530412188	PREDICTED: keratin, type I cytoskeletal 17 isoform X1 [Homo sapiens]	27	20	3	552	434	48.1	5.3	1588.73	20	93.023	0	High
1423	530399826	PREDICTED: keratin, type II cytoskeletal 80 isoform X1 [Homo sapiens]	9	6	4	75	550	60.8	5.68	247.49	6	22.327	0	High
1424	578825783	PREDICTED: kinectin isoform X1 [Homo sapiens]	25	25	25	92	1357	156.2	5.64	260.57	25	125.109	0	High
1425	530406711	PREDICTED: kinesin-like protein KIF23 isoform X1 [Homo sapiens]	5	3	3	12	974	111.6	8.5	47.08	3	17.161	0	High
1426	530364686	PREDICTED: laminin subunit gamma-2 isoform X1 [Homo sapiens]	4	5	5	15	1256	137.8	6.51	53.82	5	26.01	0	High
1427	530380464	PREDICTED: la-related protein 1 isoform X1 [Homo sapiens]	7	7	7	23	1096	123.4	8.82	56.61	7	25.954	0	High
1428	530392116	PREDICTED: la-related protein 4B isoform X1 [Homo sapiens]	3	2	2	3	796	87.2	6.76	5.23	2	7.812	0	High
1429	530371463	PREDICTED: leucine-rich repeat flightless-interacting protein 1 isoform X2 [Homo sapiens]	8	6	6	11	1009	111.8	4.77	33.03	6	23.485	0	High
1430	530403424	PREDICTED: leucine-rich repeat transmembrane protein FLRT2 isoform X1 [Homo sapiens]	10	4	4	8	660	74	7.8	27.6	4	15.942	0	High
1431	578811455	PREDICTED: leukocyte elastase inhibitor isoform X1 [Homo sapiens]	27	8	7	59	379	42.7	6.28	169.68	8	41.642	0	High
1432	578824862	PREDICTED: LIM domain only protein 7 isoform X25 [Homo sapiens]	6	7	7	9	1835	208.7	7.24	25.52	7	36.45	0	High
1433	530374597	PREDICTED: lipoma-preferred partner isoform X1 [Homo sapiens]	9	3	3	25	642	69.1	7.5	62.93	3	22.802	0	High
1434	530412393	PREDICTED: luc7-like protein 3 isoform X1 [Homo sapiens]	12	4	4	12	489	58.2	9.92	20.15	4	23.228	0	High
1435	578798683	PREDICTED: lysine-specific histone demethylase 1A isoform X4 [Homo sapiens]	7	4	4	9	878	95.3	6.25	38.05	4	19.04	0	High
1436	530367441	PREDICTED: lysocardiolipin acyltransferase 1 isoform X1 [Homo sapiens]	7	3	3	22	414	48.9	8.62	46.6	3	8.98	0	High
1437	530368148	PREDICTED: macrophage-capping protein isoform X1 [Homo sapiens]	35	10	10	173	348	38.5	6.19	548.47	10	82.853	0	High
1438	578813531	PREDICTED: MAGUK p55 subfamily member 6 isoform X3 [Homo sapiens]	5	2	2	4	540	61.1	6.18	7.51	2	7.748	0	High
1439	530370208	PREDICTED: mannose-1-phosphate guanyltransferase alpha isoform X3 [Homo sapiens]	6	2	2	8	425	46.8	7.21	29.52	2	11.452	0	High
1440	578830100	PREDICTED: mannose-P-dolichol utilization defect 1 protein isoform X1 [Homo sapiens]	16	3	3	18	260	28.2	8	46.42	3	16.455	0	High
1441	530366181	PREDICTED: melanoma inhibitory activity protein 3 isoform X1 [Homo sapiens]	2	2	2	3	1931	216.1	4.84	7.1	2	14.696	0	High
1442	530364738	PREDICTED: microsomal glutathione S-transferase 3 isoform X1 [Homo sapiens]	48	4	4	10	166	18.4	9.96	38.47	4	19.099	0	High
1443	578798810	PREDICTED: microtubule-actin cross-linking factor 1 isoform X15 [Homo sapiens]	1	7	6	28	7595	860.9	5.38	58.01	7	20.837	0	High
1444	578806067	PREDICTED: microtubule-associated protein 4 isoform X28 [Homo sapiens]	14	22	22	177	2352	251.5	6.32	399.74	22	114.974	0	High
1445	530381724	PREDICTED: mitochondrial carrier homolog 1 isoform X1 [Homo sapiens]	8	2	2	4	427	46.3	8.92	12.97	2	5.907	0	High
1446	530426693	PREDICTED: mitochondrial-processing peptidase subunit alpha isoform X1 [Homo sapiens]	6	3	3	11	563	61.7	6.86	33.41	3	15.644	0	High
1447	530377019	PREDICTED: MOB kinase activator 1B isoform X1 [Homo sapiens]	22	4	4	26	221	25.5	6.15	67.56	4	19.764	0	High
1448	530421753	PREDICTED: moesin isoform X1 [Homo sapiens]	62	44	32	688	578	67.9	6.28	1942.46	44	266.699	0	High
1449	530425685	PREDICTED: monoacylglycerol lipase ABHD12 isoform X1 [Homo sapiens]	13	4	4	14	426	46.9	8.31	31.7	4	20.586	0	High
1450	530383554	PREDICTED: monofunctional C1-tetrahydrofolate synthase, mitochondrial isoform X4 [Homo sapiens]	16	9	9	50	987	106.7	8.15	177.41	9	48.862	0	High
1451	530418460	PREDICTED: mRNA export factor isoform X1 [Homo sapiens]	4	2	2	3	434	48.1	8.91	8.81	2	6.49	0	High
1452	578821001	PREDICTED: mucin-5AC [Homo sapiens]	8	19	17	47	4966	520.3	6.93	130.82	19	73.693	0	High
1453	578808622	PREDICTED: multifunctional protein ADE2 isoform X1 [Homo sapiens]	22	15	15	104	836	93.9	8.06	285.08	15	63.047	0	High
1454	530374630	PREDICTED: muscleblind-like protein 1 isoform X4 [Homo sapiens]	13	3	3	14	431	46.5	8.79	56.94	3	22.227	0	High
1455	530393410	PREDICTED: myoferlin isoform X1 [Homo sapiens]	34	57	57	416	2080	236.5	6.24	1135.2	57	260.487	0	High
1456	530410154	PREDICTED: myosin phosphatase Rho-interacting protein isoform X1 [Homo sapiens]	3	5	5	10	2339	264.4	5.5	18.51	5	19.49	0	High
1457	530424791	PREDICTED: myosin regulatory light chain 12A isoform X2 [Homo sapiens]	61	9	9	181	177	20.4	4.75	562.3	9	78.765	0	High
1458	530410341	PREDICTED: myosin-10 isoform X1 [Homo sapiens]	15	23	11	278	2007	232.4	5.55	873.38	23	154.26	0	High
1459	530428270	PREDICTED: N(G),N(G)-dimethylarginine dimethylaminohydrolase 2 isoform X1 [Homo sapiens]	13	2	2	4	285	29.6	6.01	9.87	2	11.128	0	High
1460	530420935	PREDICTED: N-acetylserotonin O-methyltransferase-like protein isoform X1 [Homo sapiens]	4	2	2	5	621	68.8	6.07	19.13	2	8.898	0	High
1461	530396818	PREDICTED: NADH dehydrogenase [ubiquinone] iron-sulfur protein 8, mitochondrial isoform X1 [Homo sapiens]	22	4	4	23	210	23.7	6.34	53.46	4	25.357	0	High
1462	578823768	PREDICTED: nascent polypeptide-associated complex subunit alpha isoform X4 [Homo sapiens]	3	6	6	78	2078	205.3	9.58	281.26	6	66.762	0	High
1463	530397279	PREDICTED: neuroblast differentiation-associated protein AHNAK isoform X1 [Homo sapiens]	62	190	190	2112	5890	628.7	6.15	5742.35	190	1098.54	0	High
1464	578814289	PREDICTED: neuronal cell adhesion molecule isoform X14 [Homo sapiens]	3	3	3	6	1308	144.3	5.67	6.33	3	10.315	0	High
1465	578818615	PREDICTED: neuropilin-1 isoform X1 [Homo sapiens]	10	7	7	21	924	103.1	5.88	70.73	7	27.64	0	High
1466	530420122	PREDICTED: NHP2-like protein 1 isoform X1 [Homo sapiens]	22	5	5	52	294	32.7	9.67	163.05	5	23.058	0	High
1467	530403248	PREDICTED: nidogen-2 isoform X1 [Homo sapiens]	3	4	4	7	1402	154.2	5.26	21.8	4	13.952	0	High
1468	578821448	PREDICTED: nuclear mitotic apparatus protein 1 isoform X5 [Homo sapiens]	24	34	34	90	2115	238.1	5.78	265.33	34	164.707	0	High
1469	530427218	PREDICTED: nuclear pore complex protein Nup214 isoform X1 [Homo sapiens]	3	4	4	10	2132	218.1	8.18	21.68	4	19.473	0	High
1470	578836860	PREDICTED: nuclear pore complex protein Nup50 isoform X5 [Homo sapiens]	7	2	2	4	468	50.1	7.06	6.8	2	7.636	0	High
1471	530410357	PREDICTED: nuclear pore complex protein Nup88 isoform X1 [Homo sapiens]	8	3	3	15	757	85.5	5.81	56.05	3	28.461	0	High
1472	530424559	PREDICTED: nuclear pore complex protein Nup93 isoform X1 [Homo sapiens]	17	10	10	45	819	93.4	5.72	128.21	10	46.822	0	High
1473	530423529	PREDICTED: nuclear transport factor 2 isoform X1 [Homo sapiens]	39	3	3	15	127	14.5	5.38	47.12	3	16.245	0	High
1474	578820558	PREDICTED: nucleobindin-2 isoform X4 [Homo sapiens]	10	3	3	6	420	50.2	5.12	8.39	3	13.316	0	High
1475	530394600	PREDICTED: nucleolar and coiled-body phosphoprotein 1 isoform X1 [Homo sapiens]	7	4	4	27	710	74.8	9.47	74.42	4	19.659	0	High
1476	578831354	PREDICTED: nucleolar transcription factor 1 isoform X3 [Homo sapiens]	8	5	5	12	764	89.4	5.81	33.01	5	14.028	0	High
1477	530368026	PREDICTED: nucleolysin TIA-1 isoform p40 isoform X1 [Homo sapiens]	18	5	2	12	388	43.2	7.99	30.36	5	19.906	0	High
1478	530369780	PREDICTED: nucleoporin NUP53 isoform X1 [Homo sapiens]	16	3	3	14	329	35.2	9.35	51.89	3	13.899	0	High
1479	530365345	PREDICTED: nucleoprotein TPR isoform X1 [Homo sapiens]	19	32	32	134	2439	274.8	5.06	416.14	32	172.572	0	High
1480	530400295	PREDICTED: nucleosome assembly protein 1-like 1 isoform X1 [Homo sapiens]	24	8	7	123	463	53.8	4.46	436.01	8	42.1	0	High
1481	578819508	PREDICTED: ornithine aminotransferase, mitochondrial isoform X1 [Homo sapiens]	24	7	7	35	439	48.5	7.03	82.19	7	29.31	0	High
1482	578817327	PREDICTED: osteoclast-stimulating factor 1 isoform X1 [Homo sapiens]	30	6	6	46	217	24	5.5	99.02	6	34.419	0	High
1483	530382198	PREDICTED: p21-activated protein kinase-interacting protein 1 isoform X1 [Homo sapiens]	8	2	2	8	393	44.1	8.91	22.54	2	11.711	0	High
1484	578826806	PREDICTED: paired amphipathic helix protein Sin3a isoform X1 [Homo sapiens]	3	3	3	12	1273	145.1	7.25	33.91	3	14.141	0	High
1485	530377416	PREDICTED: palladin isoform X1 [Homo sapiens]	6	5	5	10	1400	152.1	7.05	24.28	5	23.537	0	High
1486	578824942	PREDICTED: paraspeckle component 1 isoform X1 [Homo sapiens]	18	7	7	23	523	58.7	6.67	61.35	7	35.841	0	High
1487	578824057	PREDICTED: paxillin isoform X10 [Homo sapiens]	3	2	2	9	1135	121.8	5.9	30.6	2	20.291	0	High
1488	578808719	PREDICTED: PDZ and LIM domain protein 5 isoform X7 [Homo sapiens]	20	9	9	44	739	79	8.65	143.93	9	52.553	0	High
1489	578811282	PREDICTED: PDZ and LIM domain protein 7 isoform X1 [Homo sapiens]	10	4	4	8	522	56.7	8.32	15.52	4	14.077	0	High
1490	578810393	PREDICTED: peptidyl-glycine alpha-amidating monooxygenase isoform X1 [Homo sapiens]	5	4	4	10	974	108.3	6.42	32.29	4	19.961	0	High
1491	578798232	PREDICTED: peptidyl-prolyl cis-trans isomerase H isoform X6 [Homo sapiens]	10	2	2	3	177	19.2	8.07	8.71	2	5.181	0.001	High
1492	578831047	PREDICTED: peptidyl-tRNA hydrolase 2, mitochondrial isoform X1 [Homo sapiens]	39	4	4	38	180	19.3	8.73	172.82	4	37.107	0	High
1493	578815313	PREDICTED: pericentriolar material 1 protein isoform X14 [Homo sapiens]	2	3	3	4	2150	242.3	5.03	12.89	3	14.685	0	High
1494	530397446	PREDICTED: phosphatidylinositol-binding clathrin assembly protein isoform X2 [Homo sapiens]	21	7	7	46	681	73.7	7.93	192.05	7	50.175	0	High
1495	578812808	PREDICTED: phosphoacetylglucosamine mutase isoform X3 [Homo sapiens]	4	2	2	4	570	62.9	6	9.82	2	5.564	0.001	High
1496	530408241	PREDICTED: phosphomannomutase 2 isoform X1 [Homo sapiens]	13	3	3	15	270	30.3	7.81	28.41	3	13.142	0	High
1497	530385302	PREDICTED: phosphoserine phosphatase isoform X3 [Homo sapiens]	23	5	5	15	225	25	5.69	43.96	5	18.469	0	High
1498	530395005	PREDICTED: plakophilin-3 isoform X1 [Homo sapiens]	9	6	6	16	812	88.6	9.42	44.54	6	20.757	0	High
1499	530400348	PREDICTED: plasma membrane calcium-transporting ATPase 1 isoform X2 [Homo sapiens]	19	17	17	103	1249	137.7	6	303.32	17	93.331	0	High
1500	530389145	PREDICTED: plectin isoform X2 [Homo sapiens]	56	233	3	3450	4685	531.7	5.96	10132.8	233	1327.59	0	High
1501	530389151	PREDICTED: plectin isoform X5 [Homo sapiens]	57	234	4	3468	4552	516.6	5.81	10136.5	234	1320.18	0	High
1502	530364383	PREDICTED: pogo transposable element with ZNF domain isoform X2 [Homo sapiens]	2	2	2	4	1410	155.2	7.4	7.12	2	10.329	0	High
1503	530413734	PREDICTED: polypeptide N-acetylgalactosaminyltransferase 1 isoform X1 [Homo sapiens]	4	2	2	4	559	64.2	7.72	9.94	2	6.974	0	High
1504	530425325	PREDICTED: polypyrimidine tract-binding protein 1 isoform X1 [Homo sapiens]	52	16	15	267	559	59.8	9.31	970.42	16	158.95	0	High
1505	530376839	PREDICTED: pre-mRNA 3'-end-processing factor FIP1 isoform X1 [Homo sapiens]	15	5	5	8	606	67.7	5.64	21.92	5	19.339	0	High
1506	530370603	PREDICTED: pre-mRNA-processing factor 40 homolog A isoform X5 [Homo sapiens]	5	4	4	17	976	110.7	7.96	47.06	4	20.81	0	High
1507	530380277	PREDICTED: probable ATP-dependent RNA helicase DDX46 isoform X1 [Homo sapiens]	15	12	12	38	1032	117.4	9.29	114.92	12	59.904	0	High
1508	578830522	PREDICTED: probable ATP-dependent RNA helicase DDX5 isoform X2 [Homo sapiens]	49	25	18	351	614	69.1	8.92	1035.64	25	125.256	0	High
1509	530415025	PREDICTED: probable cation-transporting ATPase 13A1 isoform X1 [Homo sapiens]	3	3	3	7	1242	136.8	8.07	16.11	3	10.072	0	High
1510	578828487	PREDICTED: probable glutamate--tRNA ligase, mitochondrial isoform X1 [Homo sapiens]	9	3	3	6	534	60	8.07	7.81	3	10.51	0	High
1511	578810391	PREDICTED: probable glutathione peroxidase 8 isoform X1 [Homo sapiens]	16	3	3	11	210	24	9.26	34.57	3	10.306	0	High
1512	530421594	PREDICTED: probable ubiquitin carboxyl-terminal hydrolase FAF-X isoform X1 [Homo sapiens]	2	4	4	11	2575	292.7	5.82	28.71	4	16.196	0	High
1513	530373858	PREDICTED: programmed cell death protein 10 isoform X2 [Homo sapiens]	26	5	5	31	212	24.7	8.19	98.97	5	26.871	0	High
1514	530365024	PREDICTED: proline-rich protein PRCC isoform X1 [Homo sapiens]	6	2	2	5	523	56	5.53	15.57	2	10.632	0	High
1515	530399615	PREDICTED: prostaglandin E synthase 3 isoform X1 [Homo sapiens]	50	8	8	68	164	19.3	4.58	189.98	8	32.533	0	High
1516	530374895	PREDICTED: protein CDV3 homolog isoform X1 [Homo sapiens]	21	2	2	6	259	27.5	6.4	18.12	2	9.823	0	High
1517	578802190	PREDICTED: protein ELYS isoform X1 [Homo sapiens]	1	2	2	5	2301	255.8	6.58	10.75	2	9.066	0	High
1518	578802260	PREDICTED: protein enabled homolog isoform X10 [Homo sapiens]	6	3	3	11	852	92.9	8.32	35.24	3	14.353	0	High
1519	530380370	PREDICTED: protein FAM114A2 isoform X1 [Homo sapiens]	8	2	2	2	511	56.1	4.87	7.05	2	9.695	0	High
1520	530410136	PREDICTED: protein flightless-1 homolog isoform X1 [Homo sapiens]	9	7	7	25	1296	147.5	6.1	82.66	7	38.23	0	High
1521	530400275	PREDICTED: protein phosphatase 1 regulatory subunit 12A isoform X1 [Homo sapiens]	4	4	4	13	1046	117.3	5.52	34.14	4	16.374	0	High
1522	530364414	PREDICTED: protein PRRC2C isoform X1 [Homo sapiens]	2	2	2	3	2903	317.5	9.13	4.89	2	8.264	0	High
1523	530393314	PREDICTED: protein RRP5 homolog isoform X1 [Homo sapiens]	14	16	16	42	1872	208.7	8.87	123.5	16	82.08	0	High
1524	530365268	PREDICTED: protein S100-A13 isoform X2 [Homo sapiens]	29	3	3	17	98	11.5	6.16	33.31	3	9.387	0	High
1525	530364188	PREDICTED: protein S100-A16 isoform X1 [Homo sapiens]	22	2	2	9	103	11.8	6.79	25.66	2	6.348	0	High
1526	578806443	PREDICTED: protein SEC13 homolog isoform X4 [Homo sapiens]	21	5	5	52	368	40.7	5.85	171.92	5	34.517	0	High
1527	578836653	PREDICTED: protein SON isoform X1 [Homo sapiens]	4	5	5	18	2459	266.9	5.73	62.89	5	21.419	0	High
1528	530402948	PREDICTED: protein transport protein Sec23A isoform X1 [Homo sapiens]	5	3	3	17	789	88.9	7.31	39.44	3	15.46	0	High
1529	578808913	PREDICTED: protein transport protein Sec31A isoform X18 [Homo sapiens]	8	6	6	15	1233	134.4	6.73	44.86	6	32.464	0	High
1530	530380562	PREDICTED: protocadherin-1 isoform X1 [Homo sapiens]	5	5	5	12	1281	138.7	5.17	42.84	5	22.304	0	High
1531	578814362	PREDICTED: pseudouridylate synthase 7 homolog isoform X4 [Homo sapiens]	10	5	5	12	667	75.6	6.47	26.38	5	21.273	0	High
1532	578805801	PREDICTED: putative ATP-dependent RNA helicase DHX30 isoform X1 [Homo sapiens]	2	2	2	2	1222	136	8.6	6.56	2	6.459	0	High
1533	578816199	PREDICTED: putative deoxyribonuclease TATDN1 isoform X1 [Homo sapiens]	12	3	3	4	333	37.6	7.83	14.45	3	12.187	0	High
1534	578827087	PREDICTED: pyruvate kinase PKM isoform X4 [Homo sapiens]	68	47	47	1853	605	65.8	7.99	6390.43	47	526.844	0	High
1535	530400120	PREDICTED: rac GTPase-activating protein 1 isoform X1 [Homo sapiens]	4	2	2	5	651	73.1	9.23	11.28	2	7.736	0	High
1536	530420276	PREDICTED: ran GTPase-activating protein 1 isoform X1 [Homo sapiens]	17	9	9	42	642	69.5	4.81	133.31	9	37.207	0	High
1537	578810781	PREDICTED: ras GTPase-activating protein-binding protein 1 isoform X2 [Homo sapiens]	34	10	10	91	466	52.1	5.52	291.27	10	68.872	0	High
1538	530378493	PREDICTED: ras GTPase-activating protein-binding protein 2 isoform X2 [Homo sapiens]	12	3	3	10	482	54.1	5.55	34.76	3	18.272	0	High
1539	578824076	PREDICTED: ras-related protein Rab-5B isoform X3 [Homo sapiens]	36	7	4	88	250	27.4	7.8	276.97	7	43.062	0	High
1540	530363070	PREDICTED: receptor-type tyrosine-protein phosphatase F isoform X2 [Homo sapiens]	3	4	4	6	1922	214.3	6.27	23.28	4	15.821	0	High
1541	530394493	PREDICTED: redox-regulatory protein FAM213A isoform X1 [Homo sapiens]	11	2	2	9	236	26.3	8.62	32.96	2	10.77	0	High
1542	530389078	PREDICTED: regulator of microtubule dynamics protein 1 isoform X1 [Homo sapiens]	14	5	5	18	383	43.6	8.54	50.71	5	19.55	0	High
1543	530366978	PREDICTED: rho-associated protein kinase 2 isoform X1 [Homo sapiens]	3	2	2	2	1417	164.2	5.69	6.22	2	6.498	0	High
1544	530391759	PREDICTED: ribosome-recycling factor, mitochondrial isoform X1 [Homo sapiens]	15	3	3	9	283	31.5	9.79	27.85	3	14.079	0	High
1545	578824082	PREDICTED: RNA-binding motif, single-stranded-interacting protein 2 isoform X9 [Homo sapiens]	7	2	2	3	477	52.3	9.44	13.45	2	10.108	0	High
1546	578835865	PREDICTED: RNA-binding protein Raly isoform X4 [Homo sapiens]	33	11	11	85	320	34.1	9.64	220.7	11	44.607	0	High
1547	578815163	PREDICTED: RNA-binding protein with multiple splicing isoform X8 [Homo sapiens]	16	2	2	7	224	25	9.23	13.75	2	12.386	0	High
1548	578827402	PREDICTED: SAFB-like transcription modulator isoform X3 [Homo sapiens]	2	2	2	6	1150	129.7	9.38	15.38	2	5.159	0.001	High
1549	530400556	PREDICTED: SCY1-like protein 2 isoform X2 [Homo sapiens]	3	2	2	2	929	103.6	8.22	4.9	2	3.583	0.002	High
1550	578803794	PREDICTED: septin-10 isoform X1 [Homo sapiens]	20	6	6	20	488	56.2	6.95	51.74	6	33.247	0	High
1551	530377947	PREDICTED: septin-11 isoform X1 [Homo sapiens]	13	4	3	40	439	50.8	7.01	106.3	4	23.826	0	High
1552	578804378	PREDICTED: septin-2 isoform X6 [Homo sapiens]	36	10	10	103	428	49.4	7.36	310.41	10	58.182	0	High
1553	578813710	PREDICTED: septin-7 isoform X1 [Homo sapiens]	41	14	13	85	448	52	8.73	257.78	14	76.504	0	High
1554	530360783	PREDICTED: serine/arginine repetitive matrix protein 1 isoform X1 [Homo sapiens]	6	3	3	24	918	103.9	11.84	82.5	3	24.96	0	High
1555	578828051	PREDICTED: serine/arginine repetitive matrix protein 2 isoform X6 [Homo sapiens]	8	13	13	47	2752	299.4	12.06	127.83	13	81.915	0	High
1556	530363612	PREDICTED: serine/arginine-rich splicing factor 11 isoform X2 [Homo sapiens]	8	3	3	11	491	54.3	10.45	36.62	3	17.537	0	High
1557	530404957	PREDICTED: serine/threonine-protein kinase MRCK beta isoform X1 [Homo sapiens]	2	3	3	4	1728	196	6.27	8.17	3	10.87	0	High
1558	530404919	PREDICTED: serine/threonine-protein kinase Nek9 isoform X1 [Homo sapiens]	3	2	2	3	991	108.4	5.85	10.09	2	10.373	0	High
1559	578822283	PREDICTED: serine/threonine-protein phosphatase 2A 65 kDa regulatory subunit A beta isoform isoform X4 [Homo sapiens]	16	10	2	39	688	75.8	5.54	143.8	10	58.979	0	High
1560	530408406	PREDICTED: serine/threonine-protein phosphatase 4 catalytic subunit isoform X1 [Homo sapiens]	10	2	2	7	307	35.1	5.06	32.6	2	8.532	0	High
1561	578799563	PREDICTED: serine--tRNA ligase, cytoplasmic isoform X1 [Homo sapiens]	12	5	5	19	536	61.3	7.06	54.76	5	22.681	0	High
1562	530382152	PREDICTED: serpin B6 isoform X1 [Homo sapiens]	6	2	2	8	409	46.4	5.76	20.37	2	8.865	0	High
1563	530382158	PREDICTED: serpin B9 isoform X1 [Homo sapiens]	18	5	4	26	376	42.4	5.86	70.98	5	20.417	0	High
1564	578821832	PREDICTED: serpin H1 isoform X3 [Homo sapiens]	42	13	13	74	418	46.4	8.69	221.06	13	88.269	0	High
1565	530386029	PREDICTED: serrate RNA effector molecule homolog isoform X2 [Homo sapiens]	11	7	7	34	883	101.3	5.96	101.55	7	30.647	0	High
1566	530402140	PREDICTED: S-formylglutathione hydrolase isoform X1 [Homo sapiens]	27	5	5	20	282	31.4	7.02	69.73	5	27.666	0	High
1567	530421060	PREDICTED: SH3 domain-containing kinase-binding protein 1 isoform X2 [Homo sapiens]	5	2	2	8	690	76	7.55	26.05	2	18.007	0	High
1568	578804821	PREDICTED: signal transducer and activator of transcription 1-alpha/beta isoform X1 [Homo sapiens]	29	17	17	115	750	87.3	6.05	355.26	17	77.372	0	High
1569	530400745	PREDICTED: signal transducer and activator of transcription 2 isoform X1 [Homo sapiens]	5	3	3	10	919	104.5	5.88	24.09	3	15.596	0	High
1570	530412747	PREDICTED: signal transducer and activator of transcription 3 isoform X4 [Homo sapiens]	8	4	4	12	864	97.9	7.43	39.43	4	17.85	0	High
1571	530402180	PREDICTED: sister chromatid cohesion protein PDS5 homolog B isoform X4 [Homo sapiens]	5	5	5	6	1448	164.7	8.47	18.12	5	22.807	0	High
1572	578806779	PREDICTED: sodium bicarbonate cotransporter 3 isoform X16 [Homo sapiens]	3	2	2	9	1255	140.2	6.58	17.59	2	9.334	0	High
1573	578839822	PREDICTED: solute carrier family 22 member 18 isoform X1 [Homo sapiens]	6	2	2	5	554	58.3	9.64	18.8	2	12.158	0	High
1574	578817805	PREDICTED: spectrin alpha chain, non-erythrocytic 1 isoform X5 [Homo sapiens]	57	116	116	1031	2484	285.9	5.4	3162.53	116	693.44	0	High
1575	530368014	PREDICTED: spectrin beta chain, non-erythrocytic 1 isoform X2 [Homo sapiens]	52	96	92	856	2351	272.7	5.64	2769.14	96	616.754	0	High
1576	578836355	PREDICTED: splicing factor U2AF 35 kDa subunit-like isoform X2 [Homo sapiens]	18	4	4	19	240	27.9	8.81	40.23	4	15.493	0	High
1577	530363142	PREDICTED: splicing factor, proline- and glutamine-rich isoform X2 [Homo sapiens]	30	18	17	310	707	76.1	9.44	892.3	18	111.686	0	High
1578	530401025	PREDICTED: squamous cell carcinoma antigen recognized by T-cells 3 isoform X1 [Homo sapiens]	5	4	4	10	981	111.9	5.5	27.52	4	13.099	0	High
1579	578828632	PREDICTED: sulfotransferase 1A1 isoform X2 [Homo sapiens]	9	3	3	13	386	44.1	8.54	36.41	3	10.666	0	High
1580	578828244	PREDICTED: SUMO-conjugating enzyme UBC9 isoform X3 [Homo sapiens]	22	4	4	17	184	20.4	8.46	55.43	4	18.458	0	High
1581	530392389	PREDICTED: supervillin isoform X1 [Homo sapiens]	1	2	2	2	2334	261.2	6.99	6.43	2	8.679	0	High
1582	578817821	PREDICTED: surfeit locus protein 4 isoform X1 [Homo sapiens]	13	3	3	14	301	34	9.22	50.49	3	15.197	0	High
1583	530422028	PREDICTED: sushi repeat-containing protein SRPX2 isoform X1 [Homo sapiens]	6	2	2	4	465	52.9	7.25	14.51	2	10.452	0	High
1584	530400731	PREDICTED: SWI/SNF complex subunit SMARCC2 isoform X1 [Homo sapiens]	9	7	4	57	1245	136.1	5.71	225.35	7	50.599	0	High
1585	578827503	PREDICTED: synaptosomal-associated protein 23 isoform X1 [Homo sapiens]	19	3	3	5	222	24.6	4.96	12	3	10.938	0	High
1586	530367061	PREDICTED: syndecan-1 isoform X1 [Homo sapiens]	9	2	2	7	334	34.6	4.56	20.31	2	9.658	0	High
1587	530388518	PREDICTED: syntenin-1 isoform X1 [Homo sapiens]	11	2	2	10	318	34.8	8.51	29.92	2	21.679	0	High
1588	530390113	PREDICTED: talin-1 isoform X1 [Homo sapiens]	38	57	57	472	2542	269.7	6.07	1587.27	57	405.468	0	High
1589	578824138	PREDICTED: TBC1 domain family member 15 isoform X1 [Homo sapiens]	4	2	2	3	713	82.1	5.87	8.21	2	8.19	0	High
1590	578806810	PREDICTED: TBC1 domain family member 5 isoform X7 [Homo sapiens]	3	2	2	2	817	91.2	6.33	0	2	4.875	0.001	High
1591	530370575	PREDICTED: telomere-associated protein RIF1 isoform X1 [Homo sapiens]	4	7	7	14	2472	274.3	5.52	43.16	7	25.303	0	High
1592	578832785	PREDICTED: thioredoxin-like protein 1 isoform X1 [Homo sapiens]	19	4	4	25	292	32.7	5.07	66.71	4	13.14	0	High
1593	578838705	PREDICTED: THO complex subunit 2 isoform X5 [Homo sapiens]	5	6	6	15	1642	187.9	8.35	44.49	6	22.238	0	High
1594	530408421	PREDICTED: THUMP domain-containing protein 1 isoform X3 [Homo sapiens]	12	4	4	9	439	48.5	8.84	32.44	4	18.504	0	High
1595	578841007	PREDICTED: tight junction protein ZO-1 isoform X1 [Homo sapiens]	9	11	11	36	1835	205	6.9	95.42	11	42.82	0	High
1596	530411133	PREDICTED: transcription elongation factor SPT6 isoform X2 [Homo sapiens]	2	2	2	8	1726	198.9	4.91	17.24	2	14.317	0	High
1597	530401608	PREDICTED: transmembrane emp24 domain-containing protein 2 isoform X1 [Homo sapiens]	40	6	6	30	208	23.4	5.01	98.67	6	37.599	0	High
1598	530367729	PREDICTED: transmembrane protein 214 isoform X1 [Homo sapiens]	5	3	3	15	753	84	9.16	50.31	3	21.393	0	High
1599	530376692	PREDICTED: transmembrane protein 33 isoform X2 [Homo sapiens]	9	2	2	16	247	28	9.7	56.1	2	9.499	0	High
1600	530380665	PREDICTED: treacle protein isoform X1 [Homo sapiens]	6	7	7	40	1526	156.1	8.97	111.64	7	41.223	0	High
1601	578836504	PREDICTED: trifunctional purine biosynthetic protein adenosine-3 isoform X2 [Homo sapiens]	26	16	16	54	1026	109.4	6.67	149.11	16	74.262	0	High
1602	530423397	PREDICTED: tripeptidyl-peptidase 2 isoform X1 [Homo sapiens]	2	2	2	6	1304	144.4	6.67	11.66	2	6.324	0	High
1603	578826850	PREDICTED: tropomodulin-3 isoform X1 [Homo sapiens]	27	8	8	65	352	39.6	5.19	212.23	8	37.205	0	High
1604	530406416	PREDICTED: tropomyosin alpha-1 chain isoform X17 [Homo sapiens]	51	15	2	212	248	28.7	4.82	591.79	15	70.892	0	High
1605	578826104	PREDICTED: tryptophan--tRNA ligase, cytoplasmic isoform X5 [Homo sapiens]	48	15	15	119	471	53.1	6.23	399.78	15	101.426	0	High
1606	530411924	PREDICTED: tubulin gamma-2 chain isoform X1 [Homo sapiens]	5	2	2	4	460	52.1	6.02	11.89	2	4.878	0.001	High
1607	578826089	PREDICTED: tumor necrosis factor alpha-induced protein 2 isoform X1 [Homo sapiens]	6	3	3	11	716	79.7	8.28	33.28	3	17.116	0	High
1608	578824045	PREDICTED: tyrosine-protein phosphatase non-receptor type 11 isoform X1 [Homo sapiens]	8	4	4	5	597	68.4	7.3	14.63	4	12.249	0	High
1609	578841531	PREDICTED: U4/U6 small nuclear ribonucleoprotein Prp31 isoform X1 [Homo sapiens]	15	4	4	14	499	55.4	5.78	43.73	4	27.805	0	High
1610	530364879	PREDICTED: ubiquitin carboxyl-terminal hydrolase isozyme L5 isoform X1 [Homo sapiens]	12	4	4	15	422	47.2	6.47	41.36	4	16.509	0	High
1611	578801849	PREDICTED: ubiquitin-associated protein 2-like isoform X19 [Homo sapiens]	12	8	8	30	1171	123.9	7.23	83.19	8	41.372	0	High
1612	530421539	PREDICTED: ubiquitin-like modifier-activating enzyme 1 isoform X1 [Homo sapiens]	47	36	36	420	1109	123.1	5.85	1372.81	36	251.135	0	High
1613	530376515	PREDICTED: UDP-glucose 6-dehydrogenase isoform X1 [Homo sapiens]	70	28	28	606	507	56.4	6.92	1970.22	28	209.148	0	High
1614	530365327	PREDICTED: UDP-N-acetylhexosamine pyrophosphorylase isoform X1 [Homo sapiens]	4	2	2	4	522	58.7	6.33	12.23	2	7.665	0	High
1615	530370381	PREDICTED: unconventional myosin-Ib isoform X2 [Homo sapiens]	26	23	23	169	1156	134.3	9.38	494.32	23	132.57	0	High
1616	530400971	PREDICTED: UPF0444 transmembrane protein C12orf23 isoform X1 [Homo sapiens]	11	2	2	10	309	31.8	11.82	24.93	2	13.368	0	High
1617	530384027	PREDICTED: utrophin isoform X1 [Homo sapiens]	2	5	5	6	3438	394.8	5.38	22.5	5	19.358	0	High
1618	578823890	PREDICTED: vacuolar protein sorting-associated protein 29 isoform X4 [Homo sapiens]	29	5	5	21	214	24	8.18	47.6	5	25	0	High
1619	530427837	PREDICTED: valine--tRNA ligase isoform X1 [Homo sapiens]	7	7	7	28	1265	140.5	7.59	81.91	7	24.789	0	High
1620	578833744	PREDICTED: very-long-chain enoyl-CoA reductase isoform X1 [Homo sapiens]	5	2	2	14	341	39.5	9.45	31.2	2	3.792	0.002	High
1621	578840206	PREDICTED: vesicle-fusing ATPase isoform X1 [Homo sapiens]	17	11	11	34	769	85.1	7.62	94.68	11	45.153	0	High
1622	578804197	PREDICTED: vigilin isoform X6 [Homo sapiens]	24	23	23	95	1268	141.4	6.87	304.25	23	110.455	0	High
1623	578818565	PREDICTED: vimentin isoform X1 [Homo sapiens]	91	59	55	2331	466	53.6	5.12	6828.67	59	515.616	0	High
1624	530380137	PREDICTED: voltage-dependent anion-selective channel protein 1 isoform X3 [Homo sapiens]	72	18	17	396	283	30.8	8.54	1188.65	18	164.153	0	High
1625	530429098	PREDICTED: WD repeat-containing protein 46 isoform X1 [Homo sapiens]	11	4	4	16	754	83.1	9.06	63.76	4	33.863	0	High
1626	530427102	PREDICTED: WD repeat-containing protein 5 isoform X1 [Homo sapiens]	12	2	2	2	334	36.6	8.27	8.15	2	8.282	0	High
1627	530370925	PREDICTED: X-ray repair cross-complementing protein 5 isoform X1 [Homo sapiens]	50	24	24	210	827	93.5	8.1	627.05	24	155.181	0	High
1628	530367475	PREDICTED: zinc finger protein 638 isoform X1 [Homo sapiens]	2	3	3	5	2084	231.4	6.46	14.68	3	15.842	0	High
1629	530397092	PREDICTED: zinc finger protein ubi-d4 isoform X1 [Homo sapiens]	9	2	2	2	405	45.8	6.98	4.95	2	6.931	0	High
1630	530387121	PREDICTED: zyxin isoform X1 [Homo sapiens]	10	4	4	15	632	67.2	7.23	24.94	4	14.721	0	High
1631	21536449	prefoldin subunit 1 [Homo sapiens]	20	3	3	7	122	14.2	6.81	21.2	3	6.626	0	High
1632	12408675	prefoldin subunit 2 [Homo sapiens]	30	4	4	28	154	16.6	6.58	92.24	4	20.316	0	High
1633	4507873	prefoldin subunit 3 [Homo sapiens]	17	3	3	4	197	22.6	7.11	9.43	3	8.766	0	High
1634	22202633	prefoldin subunit 5 isoform alpha [Homo sapiens]	19	2	2	19	154	17.3	6.33	51.01	2	12.972	0	High
1635	388240786	prefoldin subunit 6 [Homo sapiens]	26	3	3	12	129	14.6	8.88	30.22	3	12.099	0	High
1636	56243590	pre-mRNA 3' end processing protein WDR33 isoform 1 [Homo sapiens]	6	3	3	6	1336	145.8	9.17	23.86	3	14.072	0	High
1637	7657381	pre-mRNA-processing factor 19 [Homo sapiens]	51	14	14	129	504	55.1	6.61	434.04	14	106.38	0	High
1638	40807485	pre-mRNA-processing factor 6 [Homo sapiens]	6	5	5	10	941	106.9	8.25	21.13	5	17.998	0	High
1639	91208426	pre-mRNA-processing-splicing factor 8 [Homo sapiens]	21	39	39	178	2335	273.4	8.84	499.98	39	175.128	0	High
1640	166795301	prenylcysteine oxidase 1 precursor [Homo sapiens]	22	8	8	41	505	56.6	6.18	114.58	8	43.299	0	High
1641	194097365	pre-rRNA processing protein FTSJ3 [Homo sapiens]	22	11	11	60	847	96.5	8.4	192.53	11	54.506	0	High
1642	39780588	pre-rRNA-processing protein TSR1 homolog [Homo sapiens]	4	3	3	5	804	91.8	7.42	17.1	3	10.624	0	High
1643	334085248	presequence protease, mitochondrial isoform 1 precursor [Homo sapiens]	14	9	9	46	1038	117.4	6.92	149.28	9	54.256	0	High
1644	55769533	PRKC apoptosis WT1 regulator protein [Homo sapiens]	12	2	2	11	340	36.5	5.41	28.17	2	19.53	0	High
1645	47155554	probable aminopeptidase NPEPL1 isoform 1 [Homo sapiens]	7	2	2	7	523	55.8	6.87	23.85	2	15.069	0	High
1646	148613856	probable ATP-dependent RNA helicase DDX17 isoform 3 [Homo sapiens]	37	22	15	305	731	80.4	8.37	932.77	22	93.565	0	High
1647	41327771	probable ATP-dependent RNA helicase DDX23 [Homo sapiens]	13	9	9	45	820	95.5	9.55	147.51	9	48.407	0	High
1648	224593278	probable ATP-dependent RNA helicase DDX27 [Homo sapiens]	10	6	6	8	796	89.8	9.28	25.04	6	22.556	0	High
1649	21071032	probable ATP-dependent RNA helicase DDX41 [Homo sapiens]	5	2	2	9	622	69.8	6.84	27.6	2	14.18	0	High
1650	20149629	probable ATP-dependent RNA helicase DDX47 isoform 1 [Homo sapiens]	14	5	5	27	455	50.6	9.1	88.73	5	41.522	0	High
1651	31542656	probable ATP-dependent RNA helicase DDX49 [Homo sapiens]	4	2	2	4	483	54.2	9.06	11.18	2	7.649	0	High
1652	612407837	probable ATP-dependent RNA helicase DDX52 isoform 1 [Homo sapiens]	6	2	2	4	599	67.4	9.67	11.1	2	16.317	0	High
1653	27881482	probable ATP-dependent RNA helicase DDX58 [Homo sapiens]	7	5	5	12	925	106.5	6.4	24.12	5	22.409	0	High
1654	380692342	probable ATP-dependent RNA helicase DDX6 [Homo sapiens]	27	8	8	42	483	54.4	8.66	149.27	8	55.444	0	High
1655	13375695	probable cysteine--tRNA ligase, mitochondrial [Homo sapiens]	6	2	2	2	564	62.2	8.34	4.05	2	5.9	0	High
1656	237649012	probable rRNA-processing protein EBP2 isoform 1 [Homo sapiens]	19	5	5	41	361	40.7	9.98	126.49	5	41.197	0	High
1657	8923380	probable tRNA N6-adenosine threonylcarbamoyltransferase [Homo sapiens]	13	2	2	3	335	36.4	6.35	9.79	2	9.375	0	High
1658	23110955	pro-cathepsin H preproprotein [Homo sapiens]	12	3	3	3	335	37.4	8.07	8.67	3	6.918	0	High
1659	31377697	procollagen galactosyltransferase 1 precursor [Homo sapiens]	3	2	2	8	622	71.6	7.31	16.72	2	6.558	0	High
1660	32307144	procollagen-lysine,2-oxoglutarate 5-dioxygenase 1 precursor [Homo sapiens]	13	7	7	17	727	83.5	6.95	53.98	7	32.223	0	High
1661	33636742	procollagen-lysine,2-oxoglutarate 5-dioxygenase 2 isoform 1 precursor [Homo sapiens]	23	14	14	61	758	87	6.71	181.63	14	73.631	0	High
1662	4505891	procollagen-lysine,2-oxoglutarate 5-dioxygenase 3 precursor [Homo sapiens]	21	13	13	46	738	84.7	6.05	143.88	13	74.596	0	High
1663	4826898	profilin-1 [Homo sapiens]	73	10	10	503	140	15	8.27	1523.54	10	85.028	0	High
1664	4505751	profilin-2 isoform b [Homo sapiens]	31	4	2	38	140	15.1	6.1	125.53	4	16.472	0	High
1665	22027538	programmed cell death 6-interacting protein isoform 1 [Homo sapiens]	37	22	22	137	868	96	6.52	421.71	22	124.853	0	High
1666	4759224	programmed cell death protein 5 [Homo sapiens]	47	5	5	19	125	14.3	6.04	73.72	5	22.449	0	High
1667	7019485	programmed cell death protein 6 isoform 1 [Homo sapiens]	41	6	6	14	191	21.9	5.4	40.39	6	18.827	0	High
1668	527498279	prohibitin isoform 1 [Homo sapiens]	79	17	17	350	272	29.8	5.76	980.76	17	125.582	0	High
1669	221307584	prohibitin-2 isoform 1 [Homo sapiens]	68	19	19	337	299	33.3	9.83	959.31	19	117.52	0	High
1670	7019503	prolactin regulatory element-binding protein [Homo sapiens]	10	2	2	4	417	45.4	7.88	12.43	2	11.313	0	High
1671	4505641	proliferating cell nuclear antigen [Homo sapiens]	78	16	16	350	261	28.8	4.69	1003.6	16	121.94	0	High
1672	124494254	proliferation-associated protein 2G4 [Homo sapiens]	59	20	20	338	394	43.8	6.55	885.57	20	109.62	0	High
1673	503774453	proline-, glutamic acid- and leucine-rich protein 1 isoform 1 [Homo sapiens]	9	5	5	11	1180	124.9	4.41	41.95	5	26.875	0	High
1674	126012562	prolow-density lipoprotein receptor-related protein 1 precursor [Homo sapiens]	1	2	2	3	4544	504.3	5.39	10.63	2	7.59	0	High
1675	217272849	prolyl 4-hydroxylase subunit alpha-1 isoform 2 precursor [Homo sapiens]	22	7	7	22	534	61	6.01	82.54	7	47.267	0	High
1676	217272863	prolyl 4-hydroxylase subunit alpha-2 isoform 1 precursor [Homo sapiens]	4	2	2	6	535	60.9	5.71	18.35	2	9.423	0	High
1677	41349456	prolyl endopeptidase [Homo sapiens]	12	7	7	16	710	80.6	5.86	60.76	7	28.476	0	High
1678	110224476	prosaposin isoform b preproprotein [Homo sapiens]	28	12	12	121	527	58.4	5.14	266.13	12	43.712	0	High
1679	13376617	prostaglandin E synthase 2 isoform 1 [Homo sapiens]	8	2	2	7	377	41.9	9.16	25.35	2	12.126	0	High
1680	41152506	prostaglandin F2 receptor negative regulator precursor [Homo sapiens]	2	2	2	5	879	98.5	6.61	13.02	2	9.406	0	High
1681	4506265	prostaglandin G/H synthase 2 precursor [Homo sapiens]	4	2	2	2	604	69	7.39	6.99	2	4.268	0.001	High
1682	226059133	prostaglandin reductase 1 isoform 1 [Homo sapiens]	45	10	10	153	329	35.8	8.29	530.07	10	123.434	0	High
1683	28373194	proteasomal ubiquitin receptor ADRM1 isoform 1 [Homo sapiens]	15	4	4	7	407	42.1	5.07	18.8	4	15.892	0	High
1684	5453990	proteasome activator complex subunit 1 isoform 1 [Homo sapiens]	39	10	10	69	249	28.7	6.02	185.82	10	45.95	0	High
1685	30410792	proteasome activator complex subunit 2 [Homo sapiens]	35	7	7	38	239	27.4	5.73	134.83	7	44.059	0	High
1686	30410796	proteasome activator complex subunit 3 isoform 2 [Homo sapiens]	45	8	8	89	267	30.9	6.11	284.2	8	45.067	0	High
1687	163644283	proteasome activator complex subunit 4 [Homo sapiens]	2	3	3	9	1843	211.2	6.9	22.39	3	10.68	0	High
1688	4505023	proteasome assembly chaperone 1 isoform a [Homo sapiens]	10	2	2	7	288	32.8	7.17	18.44	2	10.493	0	High
1689	22726189	proteasome assembly chaperone 2 isoform 1 [Homo sapiens]	12	3	3	12	264	29.4	6.98	30.3	3	7.573	0	High
1690	23110935	proteasome subunit alpha type-1 isoform 1 [Homo sapiens]	56	13	13	105	269	30.2	6.99	247	13	61.539	0	High
1691	4506181	proteasome subunit alpha type-2 [Homo sapiens]	47	9	9	96	234	25.9	7.43	352.93	9	75.984	0	High
1692	4506183	proteasome subunit alpha type-3 isoform 1 [Homo sapiens]	31	8	8	84	255	28.4	5.33	224.5	8	37.944	0	High
1693	4506185	proteasome subunit alpha type-4 isoform 1 [Homo sapiens]	56	10	10	103	261	29.5	7.72	313.32	10	74.184	0	High
1694	23110942	proteasome subunit alpha type-5 isoform 1 [Homo sapiens]	62	10	10	132	241	26.4	4.79	381.87	10	78.357	0	High
1695	23110944	proteasome subunit alpha type-6 isoform a [Homo sapiens]	48	13	13	136	246	27.4	6.76	392.46	13	79.783	0	High
1696	4506189	proteasome subunit alpha type-7 [Homo sapiens]	49	10	10	118	248	27.9	8.46	384.36	10	58	0	High
1697	4506193	proteasome subunit beta type-1 [Homo sapiens]	32	7	7	92	241	26.5	8.13	337.89	7	73.413	0	High
1698	4506195	proteasome subunit beta type-2 isoform 1 [Homo sapiens]	40	7	7	73	201	22.8	7.02	222.11	7	49.362	0	High
1699	22538465	proteasome subunit beta type-3 [Homo sapiens]	39	6	6	79	205	22.9	6.55	296.62	6	53.947	0	High
1700	22538467	proteasome subunit beta type-4 [Homo sapiens]	41	8	8	74	264	29.2	5.97	217.35	8	68.416	0	High
1701	4506201	proteasome subunit beta type-5 isoform 1 [Homo sapiens]	43	11	11	91	263	28.5	6.92	300.98	11	57.33	0	High
1702	23110925	proteasome subunit beta type-6 isoform 1 proprotein [Homo sapiens]	21	5	5	88	239	25.3	4.92	215.51	5	19.38	0	High
1703	4506203	proteasome subunit beta type-7 proprotein [Homo sapiens]	39	6	6	19	277	29.9	7.68	53.67	6	30.992	0	High
1704	122937211	proteasome-associated protein ECM29 homolog [Homo sapiens]	3	4	4	9	2017	223.6	8.75	26.61	4	14.205	0	High
1705	156766050	protein AHNAK2 [Homo sapiens]	26	46	46	250	5795	616.2	5.36	577.4	46	256.259	0	High
1706	154759421	protein arginine N-methyltransferase 1 isoform 1 [Homo sapiens]	48	14	12	105	371	42.4	5.35	302.88	14	81.141	0	High
1707	20070220	protein arginine N-methyltransferase 5 isoform a [Homo sapiens]	15	6	6	38	637	72.6	6.29	116.83	6	39.686	0	High
1708	122937472	protein bicaudal C homolog 1 [Homo sapiens]	3	2	2	3	974	104.8	8.54	8.65	2	11.507	0	High
1709	7657176	protein canopy homolog 2 isoform 1 precursor [Homo sapiens]	21	3	3	43	182	20.6	4.92	138.25	3	19.946	0	High
1710	31542331	protein CYR61 precursor [Homo sapiens]	12	4	4	24	381	42	8.21	73.41	4	15.835	0	High
1711	4503249	protein DEK isoform 1 [Homo sapiens]	26	9	9	61	375	42.6	8.56	186.23	9	40.021	0	High
1712	119395758	protein diaphanous homolog 1 isoform 1 [Homo sapiens]	3	3	3	10	1272	141.3	5.41	27.96	3	14.996	0	High
1713	21361657	protein disulfide-isomerase A3 precursor [Homo sapiens]	53	30	30	661	505	56.7	6.35	1936.98	30	188.61	0	High
1714	4758304	protein disulfide-isomerase A4 precursor [Homo sapiens]	47	25	25	426	645	72.9	5.07	1251.89	25	168.412	0	High
1715	544186032	protein disulfide-isomerase A6 isoform a [Homo sapiens]	43	16	16	390	492	53.9	5.33	1452.29	16	159.643	0	High
1716	20070125	protein disulfide-isomerase precursor [Homo sapiens]	65	28	28	673	508	57.1	4.87	1959.91	28	201.6	0	High
1717	38505222	protein disulfide-isomerase TMX3 precursor [Homo sapiens]	6	2	2	3	454	51.8	4.91	10.31	2	7.597	0	High
1718	183227678	protein DJ-1 [Homo sapiens]	64	11	11	161	189	19.9	6.79	438.47	11	77.222	0	High
1719	14211889	protein dpy-30 homolog [Homo sapiens]	25	2	2	16	99	11.2	4.88	49.16	2	9.21	0	High
1720	5031873	protein ERGIC-53 precursor [Homo sapiens]	10	5	5	30	510	57.5	6.77	88.02	5	26.513	0	High
1721	40254982	protein FAM107B isoform b [Homo sapiens]	8	2	2	3	306	34.7	7.01	8.88	2	7.146	0	High
1722	118498371	protein FAM177A1 isoform 1 precursor [Homo sapiens]	9	2	2	2	236	26	4.42	5.56	2	4.4	0.001	High
1723	7661714	protein FAM3C precursor [Homo sapiens]	27	5	5	20	227	24.7	8.29	56.26	5	19.525	0	High
1724	42734438	protein FAM49B [Homo sapiens]	48	12	12	60	324	36.7	6.06	170.84	12	78.784	0	High
1725	56699482	protein FAM98A [Homo sapiens]	8	2	2	5	518	55.2	8.95	14.59	2	14.786	0	High
1726	117938759	protein GNAS isoform XLas [Homo sapiens]	11	8	7	41	1037	111	5.03	97.8	8	34.235	0	High
1727	5453682	protein HEXIM1 [Homo sapiens]	12	2	2	13	359	40.6	4.89	19.12	2	9.686	0	High
1728	4506067	protein kinase C alpha type [Homo sapiens]	9	3	3	13	672	76.7	7.05	18.95	3	15.869	0	High
1729	148747351	protein kinase C and casein kinase substrate in neurons protein 2 isoform A [Homo sapiens]	6	2	2	8	486	55.7	5.2	25.64	2	5.878	0	High
1730	47132587	protein kinase C delta-binding protein [Homo sapiens]	12	4	4	25	261	27.7	6.43	87.57	4	15.7	0	High
1731	28372533	protein kish-A precursor [Homo sapiens]	25	2	2	11	72	8.1	8.95	30.24	2	7.411	0	High
1732	22748747	protein LSM12 homolog [Homo sapiens]	14	2	2	5	195	21.7	7.74	14.24	2	9.195	0	High
1733	223555917	protein LYRIC [Homo sapiens]	22	11	11	46	582	63.8	9.32	144.51	11	56.976	0	High
1734	4505087	protein mago nashi homolog [Homo sapiens]	52	6	6	27	146	17.2	6.11	70.18	6	27.24	0	High
1735	31543091	protein MAK16 homolog [Homo sapiens]	9	2	2	11	300	35.3	5.38	27.72	2	6.482	0	High
1736	37655183	protein NDRG1 isoform 1 [Homo sapiens]	16	4	4	19	394	42.8	5.82	69.14	4	27.103	0	High
1737	193211616	protein NipSnap homolog 1 isoform 1 [Homo sapiens]	35	6	6	20	284	33.3	9.31	83.13	6	41.712	0	High
1738	22267436	protein NipSnap homolog 3A [Homo sapiens]	11	2	2	12	247	28.4	9.16	40.22	2	13.774	0	High
1739	288541299	protein NOXP20 [Homo sapiens]	8	3	3	6	563	60.7	4.68	14.64	3	19.124	0	High
1740	32306539	protein PBDC1 [Homo sapiens]	9	2	2	4	233	26	4.79	4.96	2	3.86	0.001	High
1741	4506013	protein phosphatase 1 regulatory subunit 7 isoform 1 [Homo sapiens]	13	4	4	9	360	41.5	4.91	25.56	4	15.204	0	High
1742	193211600	protein phosphatase 1A isoform 3 [Homo sapiens]	5	2	2	4	455	51.3	7.11	13.85	2	8.074	0	High
1743	29826282	protein phosphatase 1G [Homo sapiens]	11	5	5	34	546	59.2	4.36	90.66	5	25.68	0	High
1744	409971401	protein phosphatase methylesterase 1 isoform b [Homo sapiens]	9	3	3	11	400	43.8	5.85	38.49	3	13.014	0	High
1745	209969703	protein RCC2 [Homo sapiens]	21	8	8	39	522	56	8.78	115.5	8	37.669	0	High
1746	4506761	protein S100-A10 [Homo sapiens]	35	5	5	66	97	11.2	7.37	151.32	5	17.769	0	High
1747	5032057	protein S100-A11 [Homo sapiens]	83	7	7	123	105	11.7	7.12	383.96	7	60.059	0	High
1748	4506765	protein S100-A4 [Homo sapiens]	36	4	4	79	101	11.7	6.11	150.36	4	24.884	0	High
1749	7657532	protein S100-A6 [Homo sapiens]	46	4	4	143	90	10.2	5.48	294.94	4	18.137	0	High
1750	21614544	protein S100-A8 [Homo sapiens]	20	2	2	8	93	10.8	7.03	14.61	2	7.886	0	High
1751	5174663	protein S100-P [Homo sapiens]	24	2	2	31	95	10.4	4.88	100.26	2	7.364	0	High
1752	355390313	protein scribble homolog isoform a [Homo sapiens]	2	2	2	6	1655	177.6	5.1	19.18	2	12.601	0	High
1753	19923669	protein sel-1 homolog 1 isoform 1 precursor [Homo sapiens]	10	4	4	16	794	88.7	5.39	61.77	4	37.016	0	High
1754	170763498	protein SET isoform 2 [Homo sapiens]	42	8	8	162	277	32.1	4.22	546.59	8	49.844	0	High
1755	387912543	protein TBRG4 isoform 3 [Homo sapiens]	12	4	4	19	642	71.8	7.3	57.92	4	22.525	0	High
1756	306774087	protein TFG isoform 1 [Homo sapiens]	24	5	5	47	400	43.4	5.1	119.06	5	38.093	0	High
1757	289629265	protein transport protein Sec23B isoform 1 [Homo sapiens]	4	2	2	4	767	86.4	6.89	17.59	2	11.98	0	High
1758	38373669	protein transport protein Sec24C [Homo sapiens]	8	6	6	31	1094	118.2	7.06	62.6	6	30.823	0	High
1759	7019415	protein transport protein Sec61 subunit alpha isoform 1 [Homo sapiens]	7	3	3	32	476	52.2	8.06	57.37	3	11.092	0	High
1760	5803165	protein transport protein Sec61 subunit beta [Homo sapiens]	22	2	2	25	96	10	11.56	53.42	2	7.439	0	High
1761	29725607	protein unc-45 homolog A isoform 2 [Homo sapiens]	5	4	4	8	944	103	6.07	21	4	12.554	0	High
1762	49472828	protein YIPF3 [Homo sapiens]	5	2	2	2	350	38.2	5.76	4.77	2	4.768	0.001	High
1763	39777597	protein-glutamine gamma-glutamyltransferase 2 isoform a [Homo sapiens]	23	11	11	62	687	77.3	5.22	154.63	11	57.401	0	High
1764	354983493	protein-L-isoaspartate(D-aspartate) O-methyltransferase isoform 2 [Homo sapiens]	49	11	11	46	286	30.3	6.73	151.25	11	59.966	0	High
1765	20149540	protein-lysine 6-oxidase isoform 1 preproprotein [Homo sapiens]	3	2	2	8	417	46.9	8.09	19.09	2	3.912	0.001	High
1766	4505893	proteolipid protein 2 [Homo sapiens]	18	2	2	31	152	16.7	7.24	96.05	2	9.824	0	High
1767	151101407	prothymosin alpha isoform 1 [Homo sapiens]	23	5	5	104	111	12.2	3.78	290.79	5	35.262	0	High
1768	4885609	proto-oncogene tyrosine-protein kinase Src [Homo sapiens]	23	10	8	44	536	59.8	7.42	124.88	10	41.356	0	High
1769	4557831	pterin-4-alpha-carbinolamine dehydratase isoform 1 [Homo sapiens]	48	4	4	38	104	12	6.8	117.37	4	28.42	0	High
1770	157168362	purine nucleoside phosphorylase [Homo sapiens]	34	7	7	57	289	32.1	6.95	202.45	7	44.207	0	High
1771	158937236	puromycin-sensitive aminopeptidase [Homo sapiens]	28	22	22	143	919	103.2	5.72	389.23	22	106.672	0	High
1772	116063554	putative deoxyribose-phosphate aldolase isoform 1 [Homo sapiens]	15	3	3	12	318	35.2	8.94	42.13	3	17.269	0	High
1773	156151420	putative hexokinase HKDC1 [Homo sapiens]	8	6	5	26	917	102.4	7.24	77.48	6	25.099	0	High
1774	270288816	putative methyltransferase NSUN5 isoform 3 [Homo sapiens]	8	2	2	6	470	51	8.65	19	2	10.245	0	High
1775	61966781	putative peptidyl-tRNA hydrolase PTRHD1 [Homo sapiens]	26	2	2	4	140	15.8	9.1	5.68	2	7.283	0	High
1776	68509926	putative pre-mRNA-splicing factor ATP-dependent RNA helicase DHX15 [Homo sapiens]	30	19	18	123	795	90.9	7.46	381.45	19	108.406	0	High
1777	385198061	putative ribosomal RNA methyltransferase NOP2 isoform 3 [Homo sapiens]	26	14	14	121	845	92.8	9.19	310.98	14	65.874	0	High
1778	47933339	putative RNA-binding protein 15 isoform 1 [Homo sapiens]	4	2	2	2	977	107.1	10.08	2.52	2	8.315	0	High
1779	5803137	putative RNA-binding protein 3 [Homo sapiens]	38	3	3	44	157	17.2	8.91	142.06	3	38.969	0	High
1780	41393554	putative RNA-binding protein Luc7-like 1 isoform b [Homo sapiens]	9	3	2	9	371	43.7	9.92	16.79	3	14.12	0	High
1781	116812577	putative RNA-binding protein Luc7-like 2 isoform 1 [Homo sapiens]	14	5	4	12	392	46.5	10.01	17.05	5	18.574	0	High
1782	4505701	pyridoxal kinase [Homo sapiens]	38	7	7	19	312	35.1	6.13	64.82	7	37.931	0	High
1783	533112491	pyrroline-5-carboxylate reductase 1, mitochondrial isoform 5 [Homo sapiens]	23	6	5	68	346	36	7.61	259.29	6	38.661	0	High
1784	21361454	pyrroline-5-carboxylate reductase 2 isoform 1 [Homo sapiens]	21	5	4	31	320	33.6	7.77	105.98	5	25.704	0	High
1785	106049292	pyruvate carboxylase, mitochondrial precursor [Homo sapiens]	10	5	5	12	1178	129.6	6.84	32.33	5	25.939	0	High
1786	291084742	pyruvate dehydrogenase E1 component subunit alpha, somatic form, mitochondrial isoform 2 precursor [Homo sapiens]	34	11	10	78	428	47.5	8.54	297.73	11	64.297	0	High
1787	156564403	pyruvate dehydrogenase E1 component subunit beta, mitochondrial isoform 1 precursor [Homo sapiens]	47	12	12	118	359	39.2	6.65	359.33	12	75.268	0	High
1788	194306651	pyruvate dehydrogenase phosphatase regulatory subunit, mitochondrial precursor [Homo sapiens]	3	2	2	10	879	99.3	6.35	35.54	2	8.975	0	High
1789	13236495	quinone oxidoreductase isoform a [Homo sapiens]	51	11	11	97	329	35.2	8.44	292.94	11	53.392	0	High
1790	22538446	quinone oxidoreductase PIG3 isoform 1 [Homo sapiens]	10	3	3	15	332	35.5	7.17	44.99	3	13.753	0	High
1791	4503971	rab GDP dissociation inhibitor alpha [Homo sapiens]	52	21	10	228	447	50.6	5.14	660.92	21	152.501	0	High
1792	6598323	rab GDP dissociation inhibitor beta isoform 1 [Homo sapiens]	77	35	24	472	445	50.6	6.47	1401.07	35	268.552	0	High
1793	289547212	rab3 GTPase-activating protein catalytic subunit isoform 1 [Homo sapiens]	5	3	3	4	988	111.2	5.45	14.75	3	14.473	0	High
1794	19923790	rab3 GTPase-activating protein non-catalytic subunit [Homo sapiens]	3	3	3	6	1393	155.9	5.62	19.56	3	14.847	0	High
1795	386781571	radixin isoform 1 [Homo sapiens]	30	20	7	378	604	71	6.71	1113.61	20	117.398	0	High
1796	8923579	ragulator complex protein LAMTOR1 [Homo sapiens]	35	3	3	24	161	17.7	5.15	75.39	3	17.407	0	High
1797	6466466	ran-binding protein 3 isoform RANBP3-d [Homo sapiens]	8	3	3	10	567	60.2	4.78	11.83	3	12.047	0	High
1798	520975477	ran-specific GTPase-activating protein isoform 1 [Homo sapiens]	20	5	5	59	278	31.9	8.75	176.5	5	31.026	0	High
1799	155030192	rap1 GTPase-GDP dissociation stimulator 1 isoform 1 [Homo sapiens]	5	2	2	3	608	66.3	5.31	11.27	2	8.74	0	High
1800	4506787	ras GTPase-activating-like protein IQGAP1 [Homo sapiens]	44	54	52	564	1657	189.1	6.48	1741.39	54	337.58	0	High
1801	6912638	ras suppressor protein 1 isoform 1 [Homo sapiens]	22	5	5	40	277	31.5	8.65	94.91	5	24.257	0	High
1802	9845509	ras-related C3 botulinum toxin substrate 1 isoform Rac1b [Homo sapiens]	32	7	6	113	211	23.5	8.63	254.5	7	47.432	0	High
1803	256222019	ras-related protein Rab-10 [Homo sapiens]	60	12	8	177	200	22.5	8.38	469.49	12	50.189	0	High
1804	190358517	ras-related protein Rab-11B [Homo sapiens]	58	12	12	204	218	24.5	5.94	578.4	12	57.864	0	High
1805	4506363	ras-related protein Rab-13 isoform 1 [Homo sapiens]	21	4	2	48	203	22.8	9.19	103.47	4	13.778	0	High
1806	19923483	ras-related protein Rab-14 [Homo sapiens]	63	11	9	71	215	23.9	6.21	219.93	11	51.408	0	High
1807	10880989	ras-related protein Rab-18 isoform 1 [Homo sapiens]	43	7	7	32	206	23	5.24	108.87	7	28.16	0	High
1808	4758988	ras-related protein Rab-1A isoform 1 [Homo sapiens]	64	11	4	178	205	22.7	6.21	533.16	11	78.249	0	High
1809	13569962	ras-related protein Rab-1B [Homo sapiens]	67	11	4	135	201	22.2	5.73	408.79	11	71.621	0	High
1810	7661922	ras-related protein Rab-21 [Homo sapiens]	19	4	4	22	225	24.3	7.94	68.06	4	21.776	0	High
1811	5729997	ras-related protein Rab-27B [Homo sapiens]	18	3	2	7	218	24.6	5.52	16.79	3	13.546	0	High
1812	4506365	ras-related protein Rab-2A isoform a [Homo sapiens]	63	10	10	113	212	23.5	6.54	407.41	10	72.252	0	High
1813	222144319	ras-related protein Rab-34 isoform 5 [Homo sapiens]	15	4	4	19	316	35.2	8.63	47.45	4	18.217	0	High
1814	5803135	ras-related protein Rab-35 isoform 1 [Homo sapiens]	33	5	3	44	201	23	8.29	139.59	5	22.533	0	High
1815	19923262	ras-related protein Rab-5A isoform 1 [Homo sapiens]	27	5	2	63	215	23.6	8.15	192.81	5	22.125	0	High
1816	354721184	ras-related protein Rab-5C isoform b [Homo sapiens]	53	9	6	129	249	27	8.66	413.57	9	55.063	0	High
1817	34147513	ras-related protein Rab-7a [Homo sapiens]	69	11	11	132	207	23.5	6.7	369.64	11	65.462	0	High
1818	16933567	ras-related protein Rab-8A [Homo sapiens]	25	5	2	41	207	23.7	9.07	126.33	5	22.388	0	High
1819	305855090	ras-related protein Rab-9A [Homo sapiens]	12	2	2	6	201	22.8	5.47	21.72	2	8.393	0	High
1820	33946329	ras-related protein Ral-A precursor [Homo sapiens]	23	6	6	47	206	23.6	7.11	124.99	6	29.876	0	High
1821	7661678	ras-related protein Rap-1b isoform 1 precursor [Homo sapiens]	47	9	3	103	184	20.8	5.78	275.22	9	52.151	0	High
1822	38201690	ras-related protein Rap-2b [Homo sapiens]	21	3	3	10	183	20.5	4.81	33.59	3	12.79	0	High
1823	5454028	ras-related protein R-Ras precursor [Homo sapiens]	30	5	3	25	218	23.5	6.93	67.79	5	24.579	0	High
1824	311771545	RBM14-RBM4 protein isoform 1 [Homo sapiens]	27	6	2	30	339	37	8.48	75.98	6	30.53	0	High
1825	115430112	receptor expression-enhancing protein 5 [Homo sapiens]	15	3	3	47	189	21.5	8.1	101.84	3	11.756	0	High
1826	91208428	receptor-type tyrosine-protein phosphatase zeta isoform 1 precursor [Homo sapiens]	1	2	2	4	2315	254.4	4.88	10.95	2	6.801	0	High
1827	11034845	regulation of nuclear pre-mRNA domain-containing protein 1B [Homo sapiens]	20	4	3	13	326	36.9	5.97	28.77	4	17.391	0	High
1828	114796644	regulator of chromosome condensation isoform a [Homo sapiens]	39	11	11	69	452	48.1	8.16	209.18	11	64.537	0	High
1829	662033888	regulator of nonsense transcripts 1 isoform 1 [Homo sapiens]	3	2	2	10	1129	124.3	6.61	33.11	2	15.859	0	High
1830	15011918	renin receptor precursor [Homo sapiens]	21	5	5	15	350	39	6.1	46.91	5	19.459	0	High
1831	325296984	replication factor C subunit 1 isoform 2 [Homo sapiens]	3	2	2	2	1148	128.2	9.36	3.79	2	9.84	0	High
1832	31563534	replication factor C subunit 2 isoform 1 [Homo sapiens]	8	2	2	5	354	39.1	6.44	9.34	2	11.107	0	High
1833	31881687	replication factor C subunit 4 [Homo sapiens]	11	3	3	6	363	39.7	8.02	20.01	3	10.014	0	High
1834	6677723	replication factor C subunit 5 isoform 1 [Homo sapiens]	10	2	2	11	340	38.5	7.2	47.83	2	18.187	0	High
1835	4506587	replication protein A 14 kDa subunit [Homo sapiens]	24	2	2	5	121	13.6	5.08	19.08	2	10.273	0	High
1836	4506583	replication protein A 70 kDa DNA-binding subunit [Homo sapiens]	9	4	4	7	616	68.1	7.21	21.77	4	15.643	0	High
1837	4506455	reticulocalbin-1 precursor [Homo sapiens]	23	6	6	67	331	38.9	5	243.39	6	31.972	0	High
1838	426214088	reticulocalbin-2 isoform b precursor [Homo sapiens]	12	2	2	4	335	39.1	4.45	15.8	2	13.294	0	High
1839	388240768	reticulon-3 isoform e [Homo sapiens]	4	5	5	39	1032	112.5	4.96	108.15	5	17.813	0	High
1840	24431933	reticulon-4 isoform B [Homo sapiens]	66	12	12	285	373	40.3	4.78	987.71	12	120.534	0	High
1841	21361176	retinal dehydrogenase 1 [Homo sapiens]	77	33	30	1796	501	54.8	6.73	5848.72	33	446.169	0	High
1842	4506403	retinoic acid-induced protein 3 [Homo sapiens]	9	2	2	21	357	40.2	8.15	70.12	2	11.251	0	High
1843	166795268	retinol dehydrogenase 11 isoform 1 precursor [Homo sapiens]	33	6	6	25	318	35.4	8.82	84.64	6	33.297	0	High
1844	4757768	rho GDP-dissociation inhibitor 1 isoform a [Homo sapiens]	51	11	11	148	204	23.2	5.11	454.17	11	88.494	0	High
1845	4757766	rho GTPase-activating protein 1 [Homo sapiens]	28	8	8	26	439	50.4	6.29	60.42	8	29.098	0	High
1846	46249393	rho-related GTP-binding protein RhoG precursor [Homo sapiens]	37	5	4	33	191	21.3	8.12	79.47	5	22.326	0	High
1847	42822870	ribonuclease inhibitor [Homo sapiens]	33	10	10	54	461	49.9	4.82	171.13	10	49.693	0	High
1848	157151755	ribonuclease P protein subunit p30 isoform a [Homo sapiens]	8	2	2	8	322	35.5	9.61	19.05	2	8.778	0	High
1849	5032215	ribonuclease UK114 [Homo sapiens]	27	3	3	37	137	14.5	8.68	114.26	3	13.649	0	High
1850	123173757	ribonucleoprotein PTB-binding 1 [Homo sapiens]	5	2	2	7	756	79.5	8.92	17.73	2	10.946	0	High
1851	4506749	ribonucleoside-diphosphate reductase large subunit [Homo sapiens]	20	13	13	52	792	90	7.15	134.82	13	61.465	0	High
1852	260064013	ribonucleoside-diphosphate reductase subunit M2 isoform 1 [Homo sapiens]	7	2	2	15	449	51.1	6.57	55.02	2	13.496	0	High
1853	94536842	ribose-5-phosphate isomerase [Homo sapiens]	16	3	3	10	311	33.2	8.54	33.34	3	26.095	0	High
1854	13654270	ribosomal biogenesis protein LAS1L isoform 1 [Homo sapiens]	3	2	2	2	734	83	4.73	7.57	2	9.389	0	High
1855	118498359	ribosomal L1 domain-containing protein 1 [Homo sapiens]	38	14	14	154	490	54.9	10.13	416.53	14	86.134	0	High
1856	4759050	ribosomal protein S6 kinase alpha-3 [Homo sapiens]	4	3	3	17	740	83.7	6.89	34.01	3	15.115	0	High
1857	4503247	ribosomal RNA processing protein 1 homolog A [Homo sapiens]	7	2	2	17	461	52.8	9.33	58.77	2	11.313	0	High
1858	194328699	ribosomal RNA small subunit methyltransferase NEP1 [Homo sapiens]	15	3	3	4	244	26.7	9.17	7.77	3	8.441	0	High
1859	224589071	ribosome biogenesis protein BMS1 homolog [Homo sapiens]	3	3	3	7	1282	145.7	6.44	12.63	3	7.186	0	High
1860	21327667	ribosome biogenesis protein BOP1 [Homo sapiens]	11	5	5	24	746	83.6	6.19	72.57	5	24.205	0	High
1861	55770900	ribosome biogenesis protein BRX1 homolog [Homo sapiens]	11	4	4	21	353	41.4	9.92	49.93	4	12.059	0	High
1862	7662677	ribosome biogenesis protein NSA2 homolog isoform 1 [Homo sapiens]	27	5	5	8	260	30	10.27	27.21	5	21.186	0	High
1863	217330644	ribosome biogenesis protein WDR12 [Homo sapiens]	11	2	2	10	423	47.7	5.9	27.74	2	9.554	0	High
1864	14719402	ribosome biogenesis regulatory protein homolog [Homo sapiens]	23	6	6	16	365	41.2	10.7	40.57	6	22.912	0	High
1865	28416940	ribosome maturation protein SBDS [Homo sapiens]	20	4	4	18	250	28.7	8.75	57.79	4	19.132	0	High
1866	110611218	ribosome-binding protein 1 [Homo sapiens]	35	25	25	213	977	108.6	5.54	738.77	25	159.297	0	High
1867	40385883	ribulose-phosphate 3-epimerase isoform 1 [Homo sapiens]	23	2	2	6	228	24.9	5.58	22.24	2	19.408	0	High
1868	42476169	RNA polymerase II-associated factor 1 homolog isoform 1 [Homo sapiens]	5	2	2	3	531	59.9	4.63	8.53	2	7.288	0	High
1869	225735591	RNA polymerase II-associated protein 3 isoform 1 [Homo sapiens]	8	4	4	7	665	75.7	6.84	20.46	4	17.685	0	High
1870	56699409	RNA-binding motif protein, X chromosome isoform 1 [Homo sapiens]	33	14	14	166	391	42.3	10.05	473.45	14	63.47	0	High
1871	5454064	RNA-binding protein 14 isoform 1 [Homo sapiens]	26	14	11	99	669	69.4	9.67	247.23	14	64.619	0	High
1872	55741709	RNA-binding protein 25 [Homo sapiens]	7	4	4	12	843	100.1	6.32	36.34	4	12.686	0	High
1873	187960109	RNA-binding protein 28 isoform 1 [Homo sapiens]	3	2	2	11	759	85.7	9.22	37.29	2	11.716	0	High
1874	238859597	RNA-binding protein 34 isoform 1 [Homo sapiens]	8	2	2	2	430	48.5	10.11	5.88	2	10.83	0	High
1875	35493811	RNA-binding protein 39 isoform a [Homo sapiens]	22	9	9	79	530	59.3	10.1	278.42	9	54.76	0	High
1876	21359951	RNA-binding protein 42 [Homo sapiens]	4	2	2	10	480	50.4	9.63	25.31	2	6.437	0	High
1877	13899354	RNA-binding protein 4B isoform 1 [Homo sapiens]	13	4	3	21	359	40.1	6.74	64.13	4	17.639	0	High
1878	4826972	RNA-binding protein 8A [Homo sapiens]	26	4	4	22	174	19.9	5.72	61.59	4	17.013	0	High
1879	253970500	RNA-binding protein EWS isoform 1 [Homo sapiens]	8	4	4	34	661	68.9	9.29	100.83	4	23.888	0	High
1880	4826734	RNA-binding protein FUS isoform 1 [Homo sapiens]	16	7	5	127	526	53.4	9.36	409.57	7	54.254	0	High
1881	10047140	RNA-binding protein PNO1 [Homo sapiens]	22	4	4	14	252	27.9	9.73	32.26	4	19.341	0	High
1882	312147344	RNF103-CHMP3 protein [Homo sapiens]	8	2	2	3	251	28.4	4.77	8.13	2	5.682	0.001	High
1883	313569822	RPL17-C18orf32 protein isoform 1 [Homo sapiens]	34	8	8	113	228	26.4	10.1	298.64	8	45.502	0	High
1884	316983130	RPL36A-HNRNPH2 protein isoform a [Homo sapiens]	18	4	2	23	154	17.7	10.36	50.09	4	10.046	0	High
1885	12056465	rRNA 2'-O-methyltransferase fibrillarin [Homo sapiens]	52	11	11	94	321	33.8	10.18	227.98	11	77.57	0	High
1886	223278379	RRP12-like protein isoform 1 [Homo sapiens]	13	13	13	59	1297	143.6	8.75	153.67	13	65.425	0	High
1887	4506753	ruvB-like 1 [Homo sapiens]	49	14	14	209	456	50.2	6.42	610.7	14	83.461	0	High
1888	5730023	ruvB-like 2 [Homo sapiens]	35	15	15	117	463	51.1	5.64	334.13	15	74.941	0	High
1889	55770836	saccharopine dehydrogenase-like oxidoreductase [Homo sapiens]	5	2	2	7	429	47.1	9.14	10.56	2	9.824	0	High
1890	5174529	S-adenosylmethionine synthase isoform type-2 [Homo sapiens]	43	11	11	65	395	43.6	6.48	206.06	11	65.828	0	High
1891	32129199	SAP domain-containing ribonucleoprotein [Homo sapiens]	34	6	6	50	210	23.7	6.42	138.77	6	26.739	0	High
1892	24638454	sarcoplasmic/endoplasmic reticulum calcium ATPase 2 isoform b [Homo sapiens]	42	38	38	412	1042	114.7	5.34	1265.43	38	216.328	0	High
1893	321267469	scaffold attachment factor B1 isoform 1 [Homo sapiens]	14	10	4	36	917	102.8	5.49	123.52	10	47.486	0	High
1894	145580600	schlafen family member 5 [Homo sapiens]	3	2	2	3	891	101	8.22	9.58	2	11.616	0	High
1895	33469966	sec1 family domain-containing protein 1 isoform a [Homo sapiens]	25	11	11	68	642	72.3	6.27	252.5	11	74.229	0	High
1896	116256358	secretory carrier-associated membrane protein 1 isoform 1 [Homo sapiens]	11	2	2	11	338	37.9	7.42	32.82	2	22.233	0	High
1897	16445419	secretory carrier-associated membrane protein 3 isoform 1 [Homo sapiens]	16	4	4	19	347	38.3	7.64	52.64	4	36.285	0	High
1898	24797148	selenide, water dikinase 1 isoform 1 [Homo sapiens]	15	4	4	19	392	42.9	5.97	53.76	4	22.537	0	High
1899	5454048	semaphorin-3C precursor [Homo sapiens]	10	6	6	22	751	85.2	8.69	60.23	6	29.471	0	High
1900	4504237	semaphorin-7A isoform 1 preproprotein [Homo sapiens]	6	4	4	9	666	74.8	7.64	29.85	4	22.293	0	High
1901	4507185	sepiapterin reductase [Homo sapiens]	22	4	4	20	261	28	8.05	74.21	4	21.874	0	High
1902	164698494	septin-9 isoform a [Homo sapiens]	34	15	15	119	586	65.4	8.97	304.12	15	68.081	0	High
1903	4505571	sequestosome-1 isoform 1 [Homo sapiens]	10	2	2	3	440	47.7	5.22	6.22	2	9.625	0	High
1904	26051231	serine beta-lactamase-like protein LACTB, mitochondrial isoform a precursor [Homo sapiens]	5	2	2	8	547	60.7	8.53	23.2	2	6.706	0	High
1905	22547186	serine hydroxymethyltransferase, cytosolic isoform 1 [Homo sapiens]	8	3	2	13	483	53	7.71	44.85	3	15.323	0	High
1906	19923315	serine hydroxymethyltransferase, mitochondrial isoform 1 precursor [Homo sapiens]	48	18	17	283	504	56	8.53	821.55	18	121.305	0	High
1907	4758668	serine palmitoyltransferase 2 [Homo sapiens]	5	2	2	3	562	62.9	7.78	10.41	2	9.22	0	High
1908	645065997	serine protease 23 isoform b [Homo sapiens]	9	3	3	5	432	48	9.95	17.01	3	8.853	0	High
1909	4506141	serine protease HTRA1 precursor [Homo sapiens]	29	9	9	15	480	51.3	7.83	42.26	9	38.034	0	High
1910	189163501	serine protease inhibitor Kazal-type 5 isoform a precursor [Homo sapiens]	8	7	7	43	1094	124	8.09	120.83	7	43.115	0	High
1911	5902076	serine/arginine-rich splicing factor 1 isoform 1 [Homo sapiens]	44	13	13	174	248	27.7	10.36	425.46	13	50.687	0	High
1912	16905517	serine/arginine-rich splicing factor 10 isoform 2 [Homo sapiens]	15	3	3	16	262	31.3	11.27	58.73	3	16.031	0	High
1913	306482646	serine/arginine-rich splicing factor 2 [Homo sapiens]	12	3	3	67	221	25.5	11.85	182.98	3	23.249	0	High
1914	4506901	serine/arginine-rich splicing factor 3 [Homo sapiens]	38	7	6	123	164	19.3	11.65	334.4	7	45.87	0	High
1915	86991438	serine/arginine-rich splicing factor 5 [Homo sapiens]	16	4	3	42	272	31.2	11.59	114.29	4	15.716	0	High
1916	20127499	serine/arginine-rich splicing factor 6 [Homo sapiens]	24	10	6	78	344	39.6	11.43	194.75	10	33.03	0	High
1917	72534660	serine/arginine-rich splicing factor 7 isoform 1 [Homo sapiens]	24	7	6	97	238	27.4	11.82	251.97	7	39.894	0	High
1918	4506903	serine/arginine-rich splicing factor 9 [Homo sapiens]	32	6	6	36	221	25.5	8.65	88.74	6	21.94	0	High
1919	20070158	serine/threonine-protein kinase 24 isoform a precursor [Homo sapiens]	14	5	2	21	443	49.3	5.69	49.5	5	18.017	0	High
1920	4826878	serine/threonine-protein kinase OSR1 [Homo sapiens]	3	2	2	17	527	58	6.43	41.48	2	5.74	0.001	High
1921	32483399	serine/threonine-protein kinase PAK 2 [Homo sapiens]	18	6	6	14	524	58	5.96	48.17	6	19.055	0	High
1922	89276756	serine/threonine-protein kinase PRP4 homolog [Homo sapiens]	4	3	3	3	1007	116.9	10.26	11.24	3	12.109	0	High
1923	572153089	serine/threonine-protein kinase VRK2 isoform 1 [Homo sapiens]	4	2	2	10	508	58.1	8.84	34.1	2	8.737	0	High
1924	294832006	serine/threonine-protein phosphatase 2A 55 kDa regulatory subunit B alpha isoform isoform 2 [Homo sapiens]	14	5	5	12	457	53	6.49	47.03	5	27.766	0	High
1925	21361399	serine/threonine-protein phosphatase 2A 65 kDa regulatory subunit A alpha isoform [Homo sapiens]	52	25	17	168	589	65.3	5.11	466.66	25	139.5	0	High
1926	4506017	serine/threonine-protein phosphatase 2A catalytic subunit alpha isoform [Homo sapiens]	42	9	9	48	309	35.6	5.54	160.67	9	57.88	0	High
1927	6715568	serine/threonine-protein phosphatase 2B catalytic subunit alpha isoform isoform 1 [Homo sapiens]	15	5	5	20	521	58.7	5.86	61.88	5	32.031	0	High
1928	183603929	serine/threonine-protein phosphatase 6 catalytic subunit isoform a [Homo sapiens]	11	2	2	3	342	38.9	6.18	8.71	2	9.161	0	High
1929	281604136	serine/threonine-protein phosphatase PGAM5, mitochondrial isoform 1 [Homo sapiens]	11	3	3	28	289	32	8.68	52.93	3	10.224	0	High
1930	4506003	serine/threonine-protein phosphatase PP1-alpha catalytic subunit isoform 1 [Homo sapiens]	52	14	5	84	330	37.5	6.33	305.27	14	82.896	0	High
1931	46249376	serine/threonine-protein phosphatase PP1-beta catalytic subunit isoform 1 [Homo sapiens]	46	12	3	88	327	37.2	6.19	293.52	12	74.723	0	High
1932	148727341	serine-threonine kinase receptor-associated protein [Homo sapiens]	44	12	12	65	350	38.4	5.12	205.69	12	62.594	0	High
1933	225579074	serine--tRNA ligase, mitochondrial isoform a precursor [Homo sapiens]	13	4	4	25	520	58	7.36	97.22	4	31.608	0	High
1934	167860126	serpin B5 [Homo sapiens]	15	5	5	26	375	42.1	6.05	80.33	5	18.886	0	High
1935	4502027	serum albumin preproprotein [Homo sapiens]	17	11	11	229	609	69.3	6.28	734.06	11	56.133	0	High
1936	4759082	serum deprivation-response protein [Homo sapiens]	8	2	2	7	425	47.1	5.21	22.88	2	12.631	0	High
1937	66529294	serum paraoxonase/arylesterase 2 isoform 1 [Homo sapiens]	32	6	6	79	354	39.4	5.6	259.22	6	73.71	0	High
1938	13775198	SH3 domain-binding glutamic acid-rich-like protein 3 [Homo sapiens]	23	3	3	33	93	10.4	4.93	88.94	3	8.891	0	High
1939	187761324	shootin-1 isoform a [Homo sapiens]	6	3	3	6	631	71.6	5.33	13.31	3	12.325	0	High
1940	4501859	short/branched chain specific acyl-CoA dehydrogenase, mitochondrial precursor [Homo sapiens]	17	4	4	9	432	47.5	6.99	38.07	4	24.513	0	High
1941	4557233	short-chain specific acyl-CoA dehydrogenase, mitochondrial precursor [Homo sapiens]	5	2	2	2	412	44.3	7.99	4.61	2	4.366	0.001	High
1942	12056473	sialic acid synthase [Homo sapiens]	13	3	3	4	359	40.3	6.74	11.78	3	11.402	0	High
1943	23618867	sideroflexin-1 [Homo sapiens]	46	10	9	69	322	35.6	9.07	199.17	10	47.815	0	High
1944	31621303	sideroflexin-3 [Homo sapiens]	16	4	3	21	325	36	9.09	57.16	4	22.019	0	High
1945	429836839	signal peptidase complex catalytic subunit SEC11A isoform 3 [Homo sapiens]	15	3	3	16	185	21.4	9.42	51.13	3	12.751	0	High
1946	162417971	signal peptidase complex subunit 2 [Homo sapiens]	17	4	4	23	226	25	8.47	84.31	4	19.518	0	High
1947	11345462	signal peptidase complex subunit 3 [Homo sapiens]	18	3	3	24	180	20.3	8.62	67.31	3	15.198	0	High
1948	149999611	signal recognition particle 14 kDa protein [Homo sapiens]	17	2	2	8	136	14.6	10.04	26.29	2	6.515	0	High
1949	4507215	signal recognition particle 54 kDa protein isoform 1 [Homo sapiens]	16	6	6	15	504	55.7	8.75	29.99	6	27.272	0	High
1950	4507217	signal recognition particle 9 kDa protein isoform 2 [Homo sapiens]	22	2	2	26	86	10.1	7.97	58.3	2	7.036	0	High
1951	23308697	signal recognition particle receptor subunit alpha isoform 1 [Homo sapiens]	4	2	2	4	638	69.8	8.95	13.7	2	7.802	0	High
1952	284795266	signal recognition particle receptor subunit beta [Homo sapiens]	46	10	10	40	271	29.7	9.04	148.1	10	44.121	0	High
1953	24497620	signal recognition particle subunit SRP68 isoform 1 [Homo sapiens]	9	4	4	14	627	70.7	8.56	41.32	4	16.492	0	High
1954	109638749	signal recognition particle subunit SRP72 isoform 1 [Homo sapiens]	9	3	3	5	671	74.6	9.26	18.9	3	10.691	0	High
1955	374671789	single-stranded DNA-binding protein, mitochondrial precursor [Homo sapiens]	49	6	6	97	148	17.2	9.6	294.67	6	40.405	0	High
1956	155030216	sister chromatid cohesion protein PDS5 homolog A isoform 1 [Homo sapiens]	2	2	2	6	1337	150.7	7.91	14.42	2	6.976	0	High
1957	5453838	Sjoegren syndrome/scleroderma autoantigen 1 [Homo sapiens]	19	2	2	3	199	21.5	5.24	10.91	2	9.614	0	High
1958	7657234	small acidic protein [Homo sapiens]	21	2	2	8	183	20.3	4.72	14.07	2	12.59	0	High
1959	4507129	small nuclear ribonucleoprotein E [Homo sapiens]	65	4	4	45	92	10.8	9.44	125.13	4	22.247	0	High
1960	4507131	small nuclear ribonucleoprotein F [Homo sapiens]	24	2	2	18	86	9.7	4.67	53.38	2	6.99	0	High
1961	4507133	small nuclear ribonucleoprotein G [Homo sapiens]	25	2	2	18	76	8.5	8.88	46.45	2	9.624	0	High
1962	5902102	small nuclear ribonucleoprotein Sm D1 isoform 1 [Homo sapiens]	55	5	5	61	119	13.3	11.56	273.43	5	69.577	0	High
1963	4759158	small nuclear ribonucleoprotein Sm D2 isoform 1 [Homo sapiens]	56	7	7	57	118	13.5	9.91	155.79	7	29.755	0	High
1964	521258690	small nuclear ribonucleoprotein Sm D3 [Homo sapiens]	32	3	3	47	126	13.9	10.32	149.5	3	18.1	0	High
1965	38150007	small nuclear ribonucleoprotein-associated proteins B and B' isoform B' [Homo sapiens]	18	4	4	49	240	24.6	11.19	117.79	4	15.926	0	High
1966	120587023	small subunit processome component 20 homolog [Homo sapiens]	1	3	3	6	2785	318.2	7.39	16.79	3	13.06	0	High
1967	21361181	sodium/potassium-transporting ATPase subunit alpha-1 isoform a [Homo sapiens]	26	19	19	206	1023	112.8	5.49	637.54	19	104.426	0	High
1968	4502277	sodium/potassium-transporting ATPase subunit beta-1 [Homo sapiens]	26	5	5	53	303	35	8.53	116.72	5	30.573	0	High
1969	4502281	sodium/potassium-transporting ATPase subunit beta-3 [Homo sapiens]	12	2	2	8	279	31.5	8.35	35.18	2	8.579	0	High
1970	4506975	solute carrier family 12 member 2 isoform 1 [Homo sapiens]	10	9	9	59	1212	131.4	6.4	189	9	53.416	0	High
1971	166795299	solute carrier family 2, facilitated glucose transporter member 1 [Homo sapiens]	11	6	6	97	492	54	8.72	327.71	6	30.099	0	High
1972	555943884	solute carrier family 2, facilitated glucose transporter member 14 isoform d [Homo sapiens]	4	2	2	11	535	58.2	7.23	23.05	2	7.163	0	High
1973	156627571	sorbitol dehydrogenase [Homo sapiens]	8	2	2	14	357	38.3	7.97	39.28	2	12.916	0	High
1974	4507207	sorcin isoform A [Homo sapiens]	30	6	6	27	198	21.7	5.59	59	6	16.399	0	High
1975	225543166	sorting and assembly machinery component 50 homolog [Homo sapiens]	24	8	8	26	469	51.9	6.9	81.29	8	34.863	0	High
1976	23111034	sorting nexin-1 isoform a [Homo sapiens]	9	4	2	13	522	59	5.15	37.62	4	16.812	0	High
1977	4507143	sorting nexin-3 isoform a [Homo sapiens]	22	5	3	14	162	18.8	8.66	37.07	5	12.458	0	High
1978	88703041	sorting nexin-6 isoform b [Homo sapiens]	7	2	2	6	418	47.8	6.43	15.29	2	6.785	0	High
1979	63253298	spermidine synthase [Homo sapiens]	23	5	5	28	302	33.8	5.49	81.66	5	21.925	0	High
1980	21264341	spermine synthase isoform 1 [Homo sapiens]	5	2	2	2	366	41.2	5.02	2.03	2	5.224	0.001	High
1981	25777713	S-phase kinase-associated protein 1 isoform b [Homo sapiens]	37	4	4	24	163	18.6	4.54	48.57	4	15.422	0	High
1982	31982936	sphingosine-1-phosphate lyase 1 [Homo sapiens]	6	2	2	7	568	63.5	9.16	25.98	2	11.025	0	High
1983	4758112	spliceosome RNA helicase DDX39B [Homo sapiens]	44	18	7	219	428	49	5.67	617.49	18	95.81	0	High
1984	295842330	splicing factor 1 isoform 6 [Homo sapiens]	14	6	6	47	673	71.7	9.58	157.53	6	40.044	0	High
1985	5032087	splicing factor 3A subunit 1 isoform 1 [Homo sapiens]	27	16	16	106	793	88.8	5.22	359.43	16	76.571	0	High
1986	21361376	splicing factor 3A subunit 2 [Homo sapiens]	9	3	3	20	464	49.2	9.64	73.13	3	24.115	0	High
1987	5803167	splicing factor 3A subunit 3 [Homo sapiens]	15	5	5	34	501	58.8	5.38	111.31	5	23.344	0	High
1988	54112117	splicing factor 3B subunit 1 isoform 1 [Homo sapiens]	26	23	23	148	1304	145.7	7.09	470.32	23	126.958	0	High
1989	55749531	splicing factor 3B subunit 2 [Homo sapiens]	26	14	14	101	895	100.2	5.67	313.55	14	91.086	0	High
1990	54112121	splicing factor 3B subunit 3 [Homo sapiens]	19	18	18	143	1217	135.5	5.26	469.08	18	113.581	0	High
1991	5032069	splicing factor 3B subunit 4 [Homo sapiens]	13	3	3	18	424	44.4	8.56	63.87	3	23.477	0	High
1992	13775200	splicing factor 3B subunit 5 [Homo sapiens]	33	2	2	3	86	10.1	6.35	5.15	2	10.948	0	High
1993	224549005	splicing factor 45 [Homo sapiens]	12	4	4	23	401	44.9	5.97	54.44	4	12.943	0	High
1994	6005926	splicing factor U2AF 65 kDa subunit isoform a [Homo sapiens]	38	9	9	118	475	53.5	9.09	470.76	9	96.613	0	High
1995	62865635	squalene monooxygenase [Homo sapiens]	5	2	2	4	574	63.9	8.63	5.69	2	7.591	0	High
1996	567757576	squalene synthase isoform 1 [Homo sapiens]	10	3	3	5	417	48.1	6.54	8.91	3	10.919	0	High
1997	13654278	SRA stem-loop-interacting RNA-binding protein, mitochondrial isoform 1 precursor [Homo sapiens]	50	6	6	49	109	12.3	10.24	115.99	6	23.356	0	High
1998	296080746	src substrate cortactin isoform c [Homo sapiens]	23	9	9	38	634	70.9	6.64	96.12	9	54.42	0	High
1999	47419936	SRSF protein kinase 1 [Homo sapiens]	5	2	2	2	655	74.3	6.16	7.19	2	12.214	0	High
[truncated: 281 more rows]
