# Supplementary material for: Acetylation, Methylation and Allysine Modification Profile of Viral and Host Proteins during Influenza A Virus Infection
Source: Viruses. 2021 Jul 20;13(7):1415. doi: 10.3390/v13071415 (PMC8310381; doi:10.3390/v13071415)
Supplement: Supplementary file 1 [file viruses-13-01415-s001.zip › viruses-1281647-supplementary/Supplementary_Table S4.xlsx]

## Sheet: Methylation
#SI	Protein FDR Confidence	Accession number	Protein name	Modifications and Sites	Peptides	Coverage [%]	# Peptides	# PSMs	# Unique Peptides	Score Sequest HT	MW [kDa]	# AAs	Xcorr
1	High	5803227	14-3-3 protein theta [Homo sapiens]	Methyl [R55]	[R].NLLSVAYKNVVGGRR.[S]	62.449	22	582	16	1568.74	27.7	245	3.8
2	High		14-3-3 protein theta [Homo sapiens]	Methyl [K212]	[K].TAFDEAIAELDTLNEDSYKDSTLIMQLLR.[D]	62.449	22	582	16	1568.74	27.7	245	4.8
3	High	4826952	26S proteasome non-ATPase regulatory subunit 5 isoform 1 [Homo sapiens]	Methyl [K493]	[R].TYLSEGPYYVKPVSTTAVEGAE.[-]	16.2698	6	26	6	73.95	56.2	504	5.3
4	High	167614485	3-ketoacyl-CoA thiolase, mitochondrial [Homo sapiens]	Methyl [R360]	[K].TNVNGGAIALGHPLGGSGSRITAHLVHELR.[R]	36.5239	11	90	11	239.33	41.9	397	4.01
5	High	41399285	60 kDa heat shock protein, mitochondrial [Homo sapiens]	Methyl [K387]	[R].IQEIIEQLDVTTSEYEKEK.[L]	79.7557	45	1201	45	3783.75	61	573	2.09
6	High		60 kDa heat shock protein, mitochondrial [Homo sapiens]	Methyl [K389]	[R].IQEIIEQLDVTTSEYEKEK.[L]	79.7557	45	1201	45	3783.75	61	573	3.27
7	High	4506671	60S acidic ribosomal protein P2 [Homo sapiens]	Methyl [K21]	[R].YVASYLLAALGGNSSPSAKDIK.[K]	92.1739	9	199	8	651.07	11.7	115	3.87
8	High	4506597	60S ribosomal protein L12 [Homo sapiens]	Methyl [R146]	[K].EILGTAQSVGCNVDGR.[H]	59.3939	7	192	7	547.45	17.8	165	2.31
9	High	15431295	60S ribosomal protein L13 isoform 1 [Homo sapiens]	Methyl [R158]	[K].LATQLTGPVMPVRNVYK.[K]	49.2891	14	183	14	401.83	24.2	211	3.1
10	High	6005860	60S ribosomal protein L35 [Homo sapiens]	Methyl [K25]	[K].QLDDLKVELSQLR.[V]	30.0813	5	87	5	180.91	14.5	123	2.6
11	High	4501867	aconitate hydratase, mitochondrial precursor [Homo sapiens]	Methyl [K138]	[K].VAVPSTIHCDHLIEAQVGGEKDLR.[R]	38.2051	20	108	20	297.6	85.4	780	1.74
12	High		aconitate hydratase, mitochondrial precursor [Homo sapiens]	Methyl [K245]	[K].LTGSLSGWSSPKDVILK.[V]	38.2051	20	108	20	297.6	85.4	780	2.84
13	High	4501881	actin, alpha skeletal muscle [Homo sapiens]	Methyl [R256]	[KR].SYELPDGQVITIGNERFR.[C]	51.7241	20	1422	4	3719.87	42	377	2.51
14	High	24497583	aldo-keto reductase family 1 member C3 isoform 1 [Homo sapiens]	Methyl [K294]	[R].QNVQVFEFQLTAEDMKAIDGLD.[R]	86.3777	23	394	11	1106.33	36.8	323	2.82
15	High	4502049	aldose reductase [Homo sapiens]	Methyl [K195]	[K].YKPAVNQIECHPYLTQEKLIQYCQSK.[G]	69.6203	19	394	18	744.64	35.8	316	2.65
16	High		aldose reductase [Homo sapiens]	Dimethyl [K12]	[R].LLLNNGAK.[M]	69.6203	19	394	18	744.64	35.8	316	1.53
17	High	4501891	alpha-actinin-1 isoform b [Homo sapiens]	Methyl [K633]	[R].KQFGAQANVIGPWIQTK.[M]	77.13	64	1060	41	2796.72	103	892	3.78
18	High		alpha-actinin-1 isoform b [Homo sapiens]	Methyl [K682]	[K].SIVNYKPKIDQLEGDHQLIQEALIFDNK.[H]	77.13	64	1060	41	2796.72	103	892	3.39
19	High		alpha-actinin-1 isoform b [Homo sapiens]	Methyl [K684]	[K].SIVNYKPKIDQLEGDHQLIQEALIFDNK.[H]	77.13	64	1060	41	2796.72	103	892	3.39
20	High	585866354	alpha-actinin-3 isoform 1 [Homo sapiens]	Methyl [R740]	[R].VGWEQLLTSIARTINEVENQVLTR.[D]	14.8724	14	208	3	532.74	103.2	901	2.25
21	High	12025678	alpha-actinin-4 [Homo sapiens]	Methyl [K450]	[R].DYETATLSDIKALIR.[K]	80.9001	68	1644	46	4334.35	104.8	911	2.66
22	High		alpha-actinin-4 [Homo sapiens]	Methyl [K668]	[R].QFASQANVVGPWIQTKMEEIGIR.[I]	80.9001	68	1644	46	4334.35	104.8	911	3.05
23	High	4503571	alpha-enolase isoform 1 [Homo sapiens]	Methyl [K80]	[K].AVEHINKTIAPALVSKK.[L]	84.1014	42	1306	37	3856.81	47.1	434	3.81
24	High		alpha-enolase isoform 1 [Homo sapiens]	Methyl [K221]	[K].DATNVGDEGGFAPNILENKEGLELLK.[T]	84.1014	42	1306	37	3856.81	47.1	434	3.23
25	High		alpha-enolase isoform 1 [Homo sapiens]	Methyl [K228]	[K].YGKDATNVGDEGGFAPNILENKEGLELLK.[T]	84.1014	42	1306	37	3856.81	47.1	434	5.51
26	High		alpha-enolase isoform 1 [Homo sapiens]	Methyl [R269]	[K].SPDDPSRYISPDQLADLYK.[S]	84.1014	42	1306	37	3856.81	47.1	434	2.8
27	High		alpha-enolase isoform 1 [Homo sapiens]	Methyl [K358]	[K].VNQIGSVTESIQACK.[L]	84.1014	42	1306	37	3856.81	47.1	434	3.85
28	High	224809478	ankycorbin isoform d [Homo sapiens]	Methyl [K446]	[R].IQQLQEILQDLQKR.[L]	3.96745	2	19	2	35.48	110.4	983	2.31
29	High		ankycorbin isoform d [Homo sapiens]	Methyl [R447]	[R].IQQLQEILQDLQKR.[L]	3.96745	2	19	2	35.48	110.4	983	2.31
30	High	4502101	annexin A1 [Homo sapiens]	Methyl [K26]	[K].QAWFIENEEQEYVQTVKSSK.[G]	70.5202	25	836	25	2279.16	38.7	346	4.29
31	High	168229252	asparagine synthetase [glutamine-hydrolyzing] isoform a [Homo sapiens]	Trimethyl [K244]	[R].ILFNNAVKK.[R]	13	7	16	7	13.94	64.3	561	1.58
32	High	73486658	aspartate aminotransferase, mitochondrial isoform 1 precursor [Homo sapiens]	Methyl [K94]	[K].NLDKEYLPIGGLAEFCK.[A]	60	20	283	20	734.6	47.5	430	3.49
33	High		aspartate aminotransferase, mitochondrial isoform 1 precursor [Homo sapiens]	Methyl [K200]	[K].TCGFDFTGAVEDISK.[I]	60	20	283	20	734.6	47.5	430	2.74
34	High	4502303	ATP synthase subunit O, mitochondrial precursor [Homo sapiens]	Methyl [R29]	[K].LVRPPVQVYGIEGR.[Y]	64.7887	10	126	10	350.11	23.3	213	2.41
35	High		ATP synthase subunit O, mitochondrial precursor [Homo sapiens]	Methyl [K158]	[R].GEVPCTVTSASPLEEATLSELKTVL.[K]	64.7887	10	126	10	350.11	23.3	213	2.96
36	High	63055057	beta-actin-like protein 2 [Homo sapiens]	Methyl [R255]	[KR].SYELPDGQVITIGNERFR.[C]	31.6489	13	770	4	1952.05	42	376	2.51
37	High	20127454	bifunctional purine biosynthesis protein PURH [Homo sapiens]	Methyl [K406]	[K].SLFSNVVTK.[N]	20.2703	9	14	9	64.6	592	36.79	2.05
38	High	192447432	carbonic anhydrase 1 isoform a [Homo sapiens]	Methyl [R247]	[R].SLLSNVEGDNAVPMQHNNRPTQPLK.[G]	49.4253	9	35	9	80.77	28.9	261	3.43
39	High		carbonic anhydrase 1 isoform a [Homo sapiens]	Methyl [K253]	[R].SLLSNVEGDNAVPMQHNNRPTQPLK.[G]	49.4253	9	35	9	80.77	28.9	261	3.43
40	High	4503143	cathepsin D preproprotein [Homo sapiens]	Methyl [K222]	[R].ISVNNVLPVFDNLMQQKLVDQNIFSFYLSR.[D]	50	16	294	16	767.55	44.5	412	3.86
41	High		cathepsin D preproprotein [Homo sapiens]	Methyl [K331]	[K].AIGAVPLIQGEYMIPCEKVSTLPAITLK.[L]	50	16	294	16	767.55	44.5	412	3.04
42	High	11067747	cell division cycle 5-like protein [Homo sapiens]	Methyl [R351]	[R].QTAEESGITNSASSTLLSEYNVTNNSVALR.[T]	12.5935	6	9	6	92.2	802	22.43	1.78
43	High	21536286	creatine kinase B-type [Homo sapiens]	Methyl [K32]	[K].LRFPAEDEFPDLSAHNNHMAKVLTPELYAELR.[A]	46.1942	12	84	12	305.59	42.6	381	3.27
44	High	4503047	cysteine-rich protein 1 [Homo sapiens]	Methyl [K49]	[K].TLTSGGHAEHEGKPYCNHPCYAAMFGPK.[G]	57.1429	3	41	3	54.21	8.5	77	2.3
45	High		cysteine-rich protein 1 [Homo sapiens]	Methyl [K64]	[K].TLTSGGHAEHEGKPYCNHPCYAAMFGPK.[G]	57.1429	3	41	3	54.21	8.5	77	2.3
46	High	33350932	cytoplasmic dynein 1 heavy chain 1 [Homo sapiens]	Methyl [K3747]	[R].QLEKSLLQALNEVK.[G]	8.48041	31	51	31	532.1	4646	113.95	3.16
47	High	19913406	DNA topoisomerase 2-alpha [Homo sapiens]	Methyl [K321]	[K].GFQQISFVNSIATSKGGR[H]	16.7864	19	77	13	169.47	174.3	1531	3.05
48	High	4503471	elongation factor 1-alpha 1 [Homo sapiens]	Methyl [K165]	[K].MDSTEPPYSQKR.[Y]	71.2121	29	1028	15	2767.17	50.1	462	2.03
49	High		elongation factor 1-alpha 1 [Homo sapiens]	Methyl [R166]	[K].MDSTEPPYSQKR.[Y]	71.2121	29	1028	15	2767.17	50.1	462	2.03
50	High	4503475	elongation factor 1-alpha 2 [Homo sapiens]	Methyl [K79]	[R].GITIDISLWKFETTK.[Y]	46.6523	19	625	5	1498.94	50.4	463	2.34
51	High		elongation factor 1-alpha 2 [Homo sapiens]	Methyl [K84]	[R].GITIDISLWKFETTKYYITIIDAPGHR.[D]	46.6523	19	625	5	1498.94	50.4	463	3.71
52	High	20070264	endoplasmic reticulum lectin 1 isoform 1 precursor [Homo sapiens]	Methyl [K328]	[K].SIAIGSQPVLTVGTTHISKLTDDQLIK.[E]	7.66046	2	8	2	15.71	54.8	483	2.11
53	High	4507677	endoplasmin precursor [Homo sapiens]	Methyl [K114]	[R].ELISNASDALDKIR.[L]	57.2852	44	834	42	2224.01	92.4	803	3.44
54	High		endoplasmin precursor [Homo sapiens]	Methyl [K479]	[K].IADDKYNDTFWKEFGTNIK.[L]	57.2852	44	834	42	2224.01	92.4	803	3.91
55	High	4503509	eukaryotic translation initiation factor 3 subunit A [Homo sapiens]	Methyl [K264]	[K].AVEDIHGLFSLSKK.[P]	15.3401	17	116	17	278.06	166.5	1382	1.92
56	High	189083688	exosome complex component RRP42 [Homo sapiens]	Methyl [K276]	[K].VLHASLQSVVHKEESLGPK.[R]	12.3711	2	6	2	16.01	31.8	291	2.95
57	High	41872631	fatty acid synthase [Homo sapiens]	Methyl [R1507]	[K].VLQGDLVMNVYRDGAWGAFR.[H]	29.7093	51	312	51	818.84	273.3	2511	4.19
58	High	16933542	fibronectin isoform 3 preproprotein [Homo sapiens]	Methyl [R1301]	[R].VTWAPPPSIDLTNFLVRYSPVK.[N]	32.017	54	329	54	959.11	259.1	2355	2.87
59	High	160420317	filamin-A isoform 2 [Homo sapiens]	Methyl [K900]	[R].TGVELGKPTHFTVNAKAAGK.[G]	65.9615	132	2684	124	7509.58	280.6	2647	3.77
60	High		filamin-A isoform 2 [Homo sapiens]	Methyl [R1532]	[R].EGPYSISVLYGDEEVPRSPFK.[V]	65.9615	132	2684	124	7509.58	280.6	2647	2.82
61	High		filamin-A isoform 2 [Homo sapiens]	Methyl [K2133]	[K].FADQHVPGSPFSVKVTGEGR.[V]	65.9615	132	2684	124	7509.58	280.6	2647	2.97
62	High	4502419	flavin reductase (NADPH) [Homo sapiens]	Methyl [R92]	[R].NDLSPTTVMSEGARNIVAAMK.[A]	31.068	4	88	4	287.73	22.1	206	3.04
63	High	342187211	fructose-bisphosphate aldolase A isoform 2 [Homo sapiens]	Methyl [K384]	[K].AAQEEYVKR.[A]	76.0766	32	771	28	2226	45.2	418	2.11
64	High	4758484	glutathione S-transferase omega-1 isoform 1 [Homo sapiens]	Methyl [R48]	[K].GIRHEVININLK.[N]	18.6722	5	47	5	112.45	27.5	241	2.94
65	High		glutathione S-transferase omega-1 isoform 1 [Homo sapiens]	Methyl [R132]	[K].VPSLVGSFIRSQNK.[E]	18.6722	5	47	5	112.45	27.5	241	3.12
66	High	7669492	glyceraldehyde-3-phosphate dehydrogenase isoform 1 [Homo sapiens]	Methyl [K55]	[K].VDIVAINDPFIDLNYMVYMFQYDSTHGKFHGTV.[K]	80.2985	22	971	22	2622.25	36	335	2.35
67	High	167466173	heat shock 70 kDa protein 1A/1B [Homo sapiens]	Methyl [R469]	[R].FELSGIPPAPR.[G]	66.7707	36	839	25	2376.25	70	641	3.26
68	High	5729877	heat shock cognate 71 kDa protein isoform 1 [Homo sapiens]	Methyl [R469]	[K].FELTGIPPAPR.[G]	73.3746	50	1744	36	5280.17	70.9	646	2.75
69	High		heat shock cognate 71 kDa protein isoform 1 [Homo sapiens]	Dimethyl [K357]	[K].LLQDFFNGKELNK.[S]	73.3746	50	1744	36	5280.17	70.9	646	1.38
70	High	4504517	heat shock protein beta-1 [Homo sapiens]	Methyl [K112]	[R].VSLDVNHFAPDELTVKTK.[T]	58.5366	11	182	11	446.27	22.8	205	2.5
71	High	13676857	heat shock-related 70 kDa protein 2 [Homo sapiens]	Methyl [K461]	[K].DNNLLGKFDLTGIPPAPR.[G]	30.0469	18	643	5	1888.11	70	639	2.64
72	High		heat shock-related 70 kDa protein 2 [Homo sapiens]	Dimethyl [K360]	[K].LLQDFFNGKELNK.[S]	30.0469	18	643	5	1888.11	70	639	2.43
73	High		heat shock-related 70 kDa protein 2 [Homo sapiens]	Methyl [R472]	[K].DNNLLGKFDLTGIPPAPR.[G]	30.0469	18	643	5	1888.11	70	639	2.64
74	High	55956921	heterogeneous nuclear ribonucleoprotein A/B isoform b [Homo sapiens]	Methyl [R245]	[K].EVYQQQQYGSGGRGNR.[N]	38.2456	12	171	11	416.33	30.6	285	2.2
75	High		heterogeneous nuclear ribonucleoprotein A/B isoform b [Homo sapiens]	Methyl [R248]	[K].EVYQQQQYGSGGRGNR.[N]	38.2456	12	171	11	416.33	30.6	285	2.2
76	High	5803036	heterogeneous nuclear ribonucleoprotein A0 [Homo sapiens]	Dimethyl [R291]	[R].SNSGPYRGGYGGGGGYGGSSF.[-]	17.84	27	6	10	6	30.8	305	3.68
77	High	4504445	heterogeneous nuclear ribonucleoprotein A1 isoform a [Homo sapiens]	Dimethyl [R206]	[R].SGSGNFGGGRGGGFGGNDNFGRGGN.[F]	48	10	72	7	217.42	34.2	320	4.73
78	High		heterogeneous nuclear ribonucleoprotein A1 isoform a [Homo sapiens]	Dimethyl [R218]	[R].SGSGNFGGGRGGGFGGNDNFGRGGN.[F]	48	10	72	7	217.42	34.2	320	4.73
79	High	34740329	heterogeneous nuclear ribonucleoprotein A3 [Homo sapiens]	Methyl [R52]	[K].LFIGGLSFETTDDSLREHFEK.[W]	35.7143	14	214	14	563.05	39.6	378	4.57
80	High	14110407	heterogeneous nuclear ribonucleoprotein D-like isoform a [Homo sapiens]	Methyl [K161]	[K].MFIGGLSWDTSKK.[D]	17.619	8	156	6	348.82	46.4	420	3.11
81	High		heterogeneous nuclear ribonucleoprotein D-like isoform a [Homo sapiens]	Methyl [K162]	[K].MFIGGLSWDTSKK.[D]	17.619	8	156	6	348.82	46.4	420	3.36
82	High	148470406	heterogeneous nuclear ribonucleoprotein F [Homo sapiens]	Methyl [R114]	[K].HSGPNSADSANDGFVRLR.[G]	31.0843	8	164	6	525.44	45.6	415	2.34
83	High	74136883	heterogeneous nuclear ribonucleoprotein U isoform a [Homo sapiens]	Methyl [R590]	[R].NFILDQTNVSAAAQRR.[K]	28.4848	20	95	20	90.5	825	289.39	3.76
84	High	118601081	heterogeneous nuclear ribonucleoprotein U-like protein 2 [Homo sapiens]	Methyl [R684]	[R].AYGQQYWGQPGNRGGYR.[N]	27.4431	16	77	16	240.64	85.1	747	2.81
85	High		heterogeneous nuclear ribonucleoprotein U-like protein 2 [Homo sapiens]	Methyl [R688]	[R].AYGQQYWGQPGNRGGYR.[N]	27.4431	16	77	16	240.64	85.1	747	2.81
86	High	393715082	inactive tyrosine-protein kinase 7 isoform e [Homo sapiens]	Methyl [R246]	[R].VVLAPQDVVVAR.[Y]	3.15399	3	13	3	28.22	119.1	1078	2.03
87	High	153082755	interferon-induced protein with tetratricopeptide repeats 2 [Homo sapiens]	Methyl [K359]	[R].VCSILASLHALADQYEDAEYYFQKEFSK.[E]	24.3644	7	20	7	39.48	54.6	472	3.92
88	High	28178832	isocitrate dehydrogenase [NADP], mitochondrial isoform 1 precursor [Homo sapiens]	Methyl [K272]	[R].FKDIFQEIFDKHYK.[T]	39.823	16	86	15	180.66	50.9	452	2.53
89	High	118402586	lactoylglutathione lyase [Homo sapiens]	Methyl [K78]	[K].FSLYFLAYEDKNDIPK.[E]	29.3478	6	25	6	56.48	20.8	184	2.14
90	High	38045910	laminin subunit alpha-3 isoform 1 precursor [Homo sapiens]	Methyl [R1968]	[K].QISGTDGEGNNVPSGDFSREWAEAQR.[M]	2.13021	6	17	6	36.46	366.4	3333	2.68
91	High	260099723	L-lactate dehydrogenase A chain isoform 3 [Homo sapiens]	Methyl [K110]	[K].IVSGKDYNVTANSK.[L]	73.9612	24	547	22	1389.19	39.8	361	2.82
92	High		L-lactate dehydrogenase A chain isoform 3 [Homo sapiens]	Methyl [K155]	[R].NVNIFKFIIPNVVKYSPNCK.[L]	73.9612	24	547	22	1389.19	39.8	361	3.62
93	High	312283701	malate dehydrogenase, cytoplasmic isoform 1 [Homo sapiens]	Methyl [K238]	[K].EVGVYEALKDDSWLKGEFVTTVQQR.[G]	45.4545	13	141	13	361.02	38.6	352	3.35
94	High		malate dehydrogenase, cytoplasmic isoform 1 [Homo sapiens]	Methyl [R248]	[K].EVGVYEALKDDSWLKGEFVTTVQQR.[G]	45.4545	13	141	13	361.02	38.6	352	3.35
95	High	291327466	mRNA-decapping enzyme 1A isoform a [Homo sapiens]	Methyl [R376]	[R].SPLLNQPVPELSHASLIANQSPFR.[A]	7.73196	2	2	2	3.87	63.2	582	2.1
96	High	5032093	neutral amino acid transporter B(0) isoform 1 [Homo sapiens]	Methyl [K522]	[K].SELPLDPLPVPTEEGNPLLKHYR.[G]	29.0203	11	84	11	232.03	56.6	541	2.62
97	High	55956788	nucleolin [Homo sapiens]	Methyl [K333]	[K].TGISDVFAKNDLAVVDVR.[I]	37.0423	30	575	30	1367.19	76.6	710	4
98	High	32455266	peroxiredoxin-1 [Homo sapiens]	Methyl [K92]	[K].LNCQVIGASVDSHFCHLAWVNTPKK.[Q]	76.8844	24	855	21	1983.7	22.1	199	3.56
99	High	4505763	phosphoglycerate kinase 1 [Homo sapiens]	Methyl [K291]	[K].ITLPVDFVTADKFIQLINNMLDK.[V]	79.1367	30	592	30	1589.22	44.6	417	2.8
100	High	4505753	phosphoglycerate mutase 1 [Homo sapiens]	Methyl [K157]	[R].YADLTEDQLPSCESLKDTIAR.[A]	74.4094	17	278	17	791.99	28.8	254	3.29
101	High	288915536	plastin-1 [Homo sapiens]	Methyl [K545]	[K].DKSISTSLPVLDLIDAIAPNAVR.[Q]	17.6471	8	56	5	149.35	70.2	629	2.18
102	High	46367787	polyadenylate-binding protein 1 [Homo sapiens]	Dimethyl [R493]	[R].VANTSTQTMGPRPAAAAAAATPAVR.[T]	58.765	27	14	69	3	70.6	636	4.01
103	High	208431833	polyadenylate-binding protein 4 isoform 1 [Homo sapiens]	Methyl [R534]	[R].LAMDFGGAGAAQQGLTDSCQSGGVPTAVQNLAPRAAVAAAAPRAVAPYK.[Y]	31.2121	13	109	6	318.85	72.3	660	4.29
104	High	530392189	PREDICTED: 6-phosphofructokinase type C isoform X1 [Homo sapiens]	Methyl [K455]	[R].MLAIYDGFDGFAKGQIK.[E]	37.7246	22	199	19	588.36	90.8	835	2.64
105	High	578831328	PREDICTED: actin, cytoplasmic 2 isoform X1 [Homo sapiens]	Methyl [R347]	[KR].SYELPDGQVITIGNERFR.[C]	70.7265	37	2632	13	8288.4	51.2	468	2.51
106	High	530362759	PREDICTED: ATP synthase F(0) complex subunit B1, mitochondrial isoform X1 [Homo sapiens]	Methyl [R330]	[R].NNIAMALEVTYRER.[L]	25.062	9	83	9	210.26	44.4	403	3.22
107	High	530410063	PREDICTED: beta-enolase isoform X1 [Homo sapiens]	Methyl [K367]	[K].VNQIGSVTESIQACKLAQSNGWGVMVSHR.[S]	34.0858	10	364	4	1132.95	48	443	3.85
108	High	530373069	PREDICTED: DNA topoisomerase 2-beta isoform X1 [Homo sapiens]	Methyl [K970]	[K].EQVLEPMLNGTDKTPALISDYK.[E]	8.24108	11	40	5	71.15	183.2	1626	2.48
109	High	530375267	PREDICTED: F-box-like/WD repeat-containing protein TBL1XR1 isoform X1 [Homo sapiens]	Dimethyl [K135]	[R].DKLAQQQAAAAAAAAAAASQQGSAK.[N]	8	3	12	3	93.76	524	56.5	1.9
110	High	530381931	PREDICTED: heat shock protein HSP 90-beta isoform X1 [Homo sapiens]	Methyl [K53]	[R].ELISNASDALDKIR.[LY]	66.1602	54	1365	30	3550.69	83.2	724	3.44
111	High	530400152	PREDICTED: heterogeneous nuclear ribonucleoprotein A1 isoform X1 [Homo sapiens]	Methyl [K161]	[R].GFAFVTFDDHDSVDKIVIQK.[Y]	58.871	23	538	21	1270.15	38.7	372	2.14
112	High		PREDICTED: heterogeneous nuclear ribonucleoprotein A1 isoform X1 [Homo sapiens]	Methyl [R194]	[K].QEMASASSSQRGR.[SR]	58.871	23	538	21	1270.15	38.7	372	2.39
113	High		PREDICTED: heterogeneous nuclear ribonucleoprotein A1 isoform X1 [Homo sapiens]	Methyl [R196]	[K].QEMASASSSQRGR.[SR]	58.871	23	538	21	1270.15	38.7	372	2.39
114	High	530415584	PREDICTED: heterogeneous nuclear ribonucleoprotein U-like protein 1 isoform X1 [Homo sapiens]	Methyl [K461]	[K].YNILGTNAIMDKMR.[V]	22.5173	13	66	13	128.97	96.8	866	3.07
115	High	530384720	PREDICTED: heterogeneous nuclear ribonucleoproteins A2/B1 isoform X1 [Homo sapiens]	Methyl [R213]	[R].GGNFGFGDSRGGGGNFGPGPGSNFR.[G]	64.5892	26	793	24	1954.25	37.4	353	5.71
116	High	530364686	PREDICTED: laminin subunit gamma-2 isoform X1 [Homo sapiens]	Methyl [R728]	[R].MQQAEQALQDILRDAQISEGASR.[S]	5.41401	6	26	6	85	137.8	1256	3.85
117	High	578820358	PREDICTED: L-lactate dehydrogenase A-like 6A isoform X1 [Homo sapiens]	Dimethyl [K97]	[K].GETMDLQHGSPFMKMPNIVSSK.[D]	7.105	9	3	19	2	39.1	356	1.76
118	High	530397279	PREDICTED: neuroblast differentiation-associated protein AHNAK isoform X1 [Homo sapiens]	Methyl [K707]	[K].ISMPDVDLHVKGTK.[V]	57.8098	168	1701	168	3784.4	628.7	5890	3.39
119	High	578812808	PREDICTED: phosphoacetylglucosamine mutase isoform X3 [Homo sapiens]	Methyl [R533]	[R].AFVRPSGTEDVVR.[V]	6.66667	3	6	3	14.06	62.9	570	3.46
120	High	578830522	PREDICTED: probable ATP-dependent RNA helicase DDX5 isoform X2 [Homo sapiens]	Methyl [R502]	[K].RGGFNTFR.[D]	50	26	279	19	709.59	69.1	614	2.11
121	High	578821832	PREDICTED: serpin H1 isoform X3 [Homo sapiens]	Methyl [R148]	[R].LYGPSSVSFADDFVRSSK.[Q]	33.9713	10	57	10	155.86	46.4	418	3.06
122	High	530363142	PREDICTED: splicing factor, proline- and glutamine-rich isoform X2 [Homo sapiens]	Methyl [R693]	[R].GMGPGTPAGYGRGR.[E]	27.5813	17	229	16	609.12	76.1	707	3.05
123	High	530401025	PREDICTED: squamous cell carcinoma antigen recognized by T-cells 3 isoform X1 [Homo sapiens]	Methyl [R924]	[K].APGGPMLLPQTYGARGK.[G]	4.28135	3	12	3	34.86	111.9	981	3.71
124	High		PREDICTED: squamous cell carcinoma antigen recognized by T-cells 3 isoform X1 [Homo sapiens]	Methyl [K926]	[K].APGGPMLLPQTYGARGK.[G]	4.28135	3	12	3	34.86	111.9	981	3.71
125	High	530421539	PREDICTED: ubiquitin-like modifier-activating enzyme 1 isoform X1 [Homo sapiens]	Methyl [K889]	[K].ATLPSPDKLPGFK.[M]	39.4049	31	339	31	980.02	123.1	1109	1.6
126	High	544186032	protein disulfide-isomerase A6 isoform a [Homo sapiens]	Methyl [K260]	[K].NLEPEWAAAASEVKEQTK.[G]	42.2764	16	326	16	1046.2	53.9	492	3.4
127	High		protein disulfide-isomerase A6 isoform a [Homo sapiens]	Methyl [R283]	[K].LAAVDATVNQVLASRYGIR.[G]	42.2764	16	326	16	1046.2	53.9	492	2.84
128	High	4503971	rab GDP dissociation inhibitor alpha [Homo sapiens]	Methyl [R208]	[R].TDDYLDQPCLETVNRIK.[L]	51.9016	21	205	10	545.08	50.6	447	3.72
129	High	4506787	ras GTPase-activating-like protein IQGAP1 [Homo sapiens]	Methyl [R870]	[K].TLINAEDPPMVVVRK.[F]	43.452	52	465	52	1265.54	189.1	1657	2.64
130	High	316983130	RPL36A-HNRNPH2 protein isoform a [Homo sapiens]	Methyl [K89]	[R].KQSGYGGQTKPIFR.[K]	21.4286	5	51	2	65.11	154	17.7	2.58
131	High	167860126	serpin B5 [Homo sapiens]	Methyl [K64]	[K].GDTANEIGQVLHFENVK.[D]	17.0667	5	24	5	66.26	42.1	375	2.03
132	High	23618867	sideroflexin-1 [Homo sapiens]	Methyl [R233]	[K].QAITQVVVSR.[I]	28.882	8	20	8	35.6	322	48.57	2.13
133	High	38150007	small nuclear ribonucleoprotein-associated proteins B and B' isoform B' [Homo sapiens]	Methyl [R108]	[R].VPLAGAAGGPGIGRAAGR.[G]	18.3333	4	61	4	148.71	24.6	240	4.48
134	High	55749531	splicing factor 3B subunit 2 [Homo sapiens]	Methyl [R245]	[R].VAAPVGPVGPTPTVLPMGAPVPRPR.[G]	26.1453	13	100	13	260.17	100.2	895	1.84
135	High		splicing factor 3B subunit 2 [Homo sapiens]	Methyl [R247]	[R].VAAPVGPVGPTPTVLPMGAPVPRPR.[G]	26.1453	13	100	13	260.17	100.2	895	1.84
136	High		splicing factor 3B subunit 2 [Homo sapiens]	Methyl [K672]	[K].IPGLNSPIPESCSFGYHAGGWGKPPVDETGKPLYGDVFGTNAAEFQTK.[T]	26.1453	13	100	13	260.17	100.2	895	4.9
137	High		splicing factor 3B subunit 2 [Homo sapiens]	Methyl [K680]	[K].IPGLNSPIPESCSFGYHAGGWGKPPVDETGKPLYGDVFGTNAAEFQTK.[T]	26.1453	13	100	13	260.17	100.2	895	4.9
138	High	115387094	succinate dehydrogenase [ubiquinone] iron-sulfur subunit, mitochondrial precursor [Homo sapiens]	Methyl [K80]	[K].IKNEVDSTLTFR.[R]	24.2857	5	19	5	47.27	31.6	280	2.4
139	High	21327701	TATA-binding protein-associated factor 2N isoform 1 [Homo sapiens]	Dimethyl [R206]	[R].GPMTGSSGGDRGGFK.[N]	20	6	41	4	134.17	592	61.8	4.27
140	High	24307939	T-complex protein 1 subunit epsilon [Homo sapiens]	Methyl [K150]	[R].VAIEHLDKISDSVLVDIKDTEPLIQTAK.[T]	54.8983	25	166	24	384.8	59.6	541	3.41
141	High	48762932	T-complex protein 1 subunit theta isoform 1 [Homo sapiens]	Methyl [K296]	[K].AIADTGANVVVTGGKVADMALHYANK.[Y]	60.9489	28	277	28	656.76	59.6	548	2.96
142	High	40317626	thrombospondin-1 precursor [Homo sapiens]	Methyl [R189]	[K].MENAELDVPIQSVFTRDLASIAR.[L]	25.5556	25	91	25	262.41	129.3	1170	3.64
143	High	5803187	transaldolase [Homo sapiens]	Methyl [K81]	[K].LGGSQEDQIKNAIDKLFVLFGAEILK.[K]	68.2493	22	289	22	736.1	37.5	337	4.68
144	High	469608410	transgelin-2 isoform a [Homo sapiens]	Methyl [K109]	[K].IQASTMAFKQMEQISQFLQAAER.[Y]	80.4545	19	524	18	1512.62	220	24.4	4.22
145	High	384475521	transketolase isoform 2 [Homo sapiens]	Methyl [K102]	[R].KISSDLDGHPVPK.[Q]	76.8621	37	957	37	2592.3	68.8	631	3.16
146	High	226529917	triosephosphate isomerase isoform 2 [Homo sapiens]	Methyl [K106]	[K].IAVAAQNCYKVTNGAFTGEISPGMIK.[D]	80.4196	22	730	22	2123.6	30.8	286	2.6
147	High		triosephosphate isomerase isoform 2 [Homo sapiens]	Methyl [K256]	[R].IIYGGSVTGATCKELASQPDVDGFLVGGASLK.[P]	80.4196	22	730	22	2123.6	30.8	286	4.09
148	High	14389309	tubulin alpha-1C chain [Homo sapiens]	Methyl [R79]	[R].AVFVDLEPTVIDEVR.[T]	84.6325	34	889	11	2589.86	49.9	449	3.75
149	High	17921993	tubulin alpha-3C/D chain [Homo sapiens]	Methyl [R79]	[R].AVFVDLEPTVVDEVRTGTYR.[Q]	69.3333	26	736	4	2187.47	49.9	450	3.15
150	High		tubulin alpha-3C/D chain [Homo sapiens]	Methyl [K112]	[R].GHYTIGKEIVDLVLDRIR.[K]	69.3333	26	736	4	2187.47	49.9	450	3.37
151	High	29788785	tubulin beta chain isoform b [Homo sapiens]	Methyl [R46]	[K].FWEVISDEHGIDPTGTYHGDSDLQLDRISVYYNEATGGK.[V]	75.9009	31	1165	3	3478.65	49.6	444	5.6
152	High		tubulin beta chain isoform b [Homo sapiens]	Methyl [K103]	[R].SGPFGQIFRPDNFVFGQSGAGNNWAK.[G]	75.9009	31	1165	3	3478.65	49.6	444	5.26
153	High	4507729	tubulin beta-2A chain [Homo sapiens]	Methyl [R46]	[K].FWEVISDEHGIDPTGTYHGDSDLQLDRISVYYNEATGGK.[V]	67.8652	28	943	2	2775.04	49.9	445	3.11
154	High		tubulin beta-2A chain [Homo sapiens]	Methyl [K103]	[R].SGPFGQIFRPDNFVFGQSGAGNNWAK.[G]	67.8652	28	943	2	2775.04	49.9	445	5.2
155	High	50592996	tubulin beta-3 chain isoform 1 [Homo sapiens]	Methyl [R156]	[K].VREEYPDRIMNTFSVVPSPK.[V]	58.6667	24	651	7	1861.33	50.4	450	3.59
156	High	21361322	tubulin beta-4A chain isoform 3 [Homo sapiens]	Methyl [K103]	[R].SGPFGQIFRPDNFVFGQSGAGNNWAK.[G]	66.8919	25	938	2	2747.46	49.6	444	5.26
157	High	5174735	tubulin beta-4B chain [Homo sapiens]	Methyl [K103]	[R].SGPFGQIFRPDNFVFGQSGAGNNWAK.[G]	75.7303	31	1108	2	3311.41	49.8	445	5.26
158	High	14210536	tubulin beta-6 chain [Homo sapiens]	Methyl [K103]	[R].SGPFGQIFRPDNFVFGQSGAGNNWAK.[G]	61.435	21	523	10	1507.59	49.8	446	3.37
159	High	566006139	uridine phosphorylase 1 isoform a [Homo sapiens]	Methyl [R64]	[K].FVCVGGSPSRMK.[A]	7.41935	3	9	3	22	310	33.9	2.56
		Total Modified Proteins	116, Highlighted in grey indicate the same proteins modified with methylation at more than one site AND/OR in color with multiple modifications (see proteins in other tabs highlighted with same color).	95 Lys, 64 Arg
		82 proteins modified on one residue	82
		34 proteins modified on more than one residues	77 (28 on two, 4 on three, 1 on four, 1 on five); 16 on both K and R (highlighted in grey in column E)
		Total Modified Sites	159

## Sheet: Acetylation-Lysine
#SI	Protein FDR Confidence	Accession number	Protein name	Modifications and Sites	Peptides	Coverage [%]	# Peptides	# PSMs	# Unique Peptides	Score Sequest HT	MW [kDa]	# AAs	XCorr
1	High	4501881	actin, alpha skeletal muscle [Homo sapiens]	Acetyl [K52]	[R].HQGVMVGMGQKDSYVGDEAQSK.[R]	51.7241	20	1880	4	4917.7	42	377	2.74
2	High	223468663	aldo-keto reductase family 1 member B10 [Homo sapiens]	Acetyl [K195]	[K].YKPVTNQVECHPYLTQEKLIQYCHSK.[G]	82.9114	26	1012	26	2451.08	36	316	2.58
3	High	4502049	aldose reductase [Homo sapiens]	Acetyl [K203]	[K].YKPAVNQIECHPYLTQEKLIQYCQSK.[G]	69.6203	19	475	18	884.07	35.8	316	2.65
4	High	4501891	alpha-actinin-1 isoform b [Homo sapiens]	Acetyl [K682]	[K].SIVNYKPKIDQLEGDHQLIQEALIFDNK.[H]	77.13	64	1441	41	3818.06	103	892	3.39
5	High		alpha-actinin-1 isoform b [Homo sapiens]	Acetyl [K684]	[K].SIVNYKPKIDQLEGDHQLIQEALIFDNK.[H]	77.13	64	1441	41	3818.06	103	892	3.39
6	High	4503471	elongation factor 1-alpha 1 [Homo sapiens]	Acetyl [K273]	[R].VETGVLKPGMVVTFAPVNVTTEVK.[S]	71.2121	29	1237	15	3279.19	50.1	462	2.97
7	High	7657069	ERO1-like protein alpha precursor [Homo sapiens]	Acetyl [K210]	[K].IWNVIYEENCFKPQTIK.[R]	38.2479	16	174	16	375.02	54.4	468	2.65
8	High		ERO1-like protein alpha precursor [Homo sapiens]	Acetyl [K215]	[K].IWNVIYEENCFKPQTIK.[R]	38.2479	16	174	16	375.02	54.4	468	2.65
9	High	208431833	polyadenylate-binding protein 4 isoform 1 [Homo sapiens]	Acetyl [K540]	[R].LAMDFGGAGAAQQGLTDSCQSGGVPTAVQNLAPRAAVAAAAPRAVAPYK.[Y]	32.7273	14	146	7	445.34	72.3	660	4.29
10	High	578831328	PREDICTED: actin, cytoplasmic 2 isoform X1 [Homo sapiens]	Acetyl [K143]	[R].HQGVMVGMGQKDSYVGDEAQSK.[R]	70.7265	37	3517	13	11190.6	51.2	468	2.74
11	High	578822814	PREDICTED: alpha-2-macroglobulin isoform X1 [Homo sapiens]	Acetyl [K1162]	[K].ALLAYAFALAGNQDK.[R]	2.38095	3	32	3	68.19	167.4	1512	3.25
12	High	530417837	PREDICTED: BPI fold-containing family A member 2 isoform X1 [Homo sapiens]	Acetyl [K91]	[K].AQEAEKLLNNVISK.[L]	8.43373	2	28	2	34.11	27	249	3.57
13	High	530378226	PREDICTED: calcium/calmodulin-dependent protein kinase type II subunit delta isoform X1 [Homo sapiens]	Acetyl [K362]	[K].ANVVTSPKENIPTPALEPQTTVIHNPDGNK.[E]	33.5835	10	40	10	96.34	60	533	2.83
14	High	530382418	PREDICTED: dystonin isoform X1 [Homo sapiens]	Acetyl [K5756]	[K].LEEQIAQHK.[VA]	0.447685	3	12	3	24.32	887.8	7818	2.93
15	High	578839603	PREDICTED: HLA class I histocompatibility antigen, alpha chain G isoform X1 [Homo sapiens]	Acetyl [K168]	[R].SWTAADTAAQISK.[R]	8	2	4	2	112.56	38.9	346	3.17
16	High	578827087	PREDICTED: pyruvate kinase PKM isoform X4 [Homo sapiens]	Acetyl [K549]	[R].GIFPVLCKDPVQEAWAEDVDLR.[V]	67.6033	46	1777	44	5663.22	65.8	605	4.61
17	High	530390113	PREDICTED: talin-1 isoform X1 [Homo sapiens]	Acetyl [K2328]	[K].LEQLKPRAK.[P]	36	64	235	57	487.76	269.7	2542	1.81
18	High	578826104	PREDICTED: tryptophan--tRNA ligase, cytoplasmic isoform X5 [Homo sapiens]	Acetyl [K249]	[K].TFIFSDLDYMGMSSGFYK.[N]	51.5924	16	118	16	370.25	53.1	471	1.23
19	High	4826730	serine/threonine-protein kinase mTOR [Homo sapiens]	Acetyl [K1068]	[R].EFWVMNTSIQSTIILLIEQIVVALGGEFK.[L]	1.45155	2	13	2	19.93	288.7	2549	2.44
20	High	4502027	serum albumin preproprotein [Homo sapiens]	Acetyl [K438]	[K].KVPQVSTPTLVEVSR.[N]	18.0624	13	509	13	1153.63	69.3	609	3.24
21	High		serum albumin preproprotein [Homo sapiens]	Acetyl [K549]	[K].KQTALVELVK.[H]	18.0624	13	509	13	1153.63	69.3	609	2.16
22	High	55749531	splicing factor 3B subunit 2 [Homo sapiens]	Acetyl [K672]	[K].IPGLNSPIPESCSFGYHAGGWGKPPVDETGKPLYGDVFGTNAAEFQTK.[T]	30.0559	15	130	15	329.7	100.2	895	4.9
23	High		splicing factor 3B subunit 2 [Homo sapiens]	Acetyl [K680]	[K].IPGLNSPIPESCSFGYHAGGWGKPPVDETGKPLYGDVFGTNAAEFQTK.[T]	30.0559	15	130	15	329.7	100.2	895	4.9
24	High	170296790	trypsin-3 isoform 1 preproprotein [Homo sapiens]	Acetyl [K136]	[R].LGEHNIKVLEGNEQFINAAK.[I]	6.57895	2	9	2	28.54	32.5	304
		Total Modified Proteins	20
		4 proteins modified on two lysine residues

## Sheet: Acetylation-Serine
#SI	Protein FDR Confidence	Accession number	Protein name	Modifications and Sites	Peptide	Coverage [%]	# Peptides	# PSMs	# Unique Peptides	Score Sequest HT	MW [kDa]	# AAs	XCorr (by Search Engine): Sequest HT (of peptide)
1	High	4885049	actin, alpha cardiac muscle 1 proprotein [Homo sapiens]	Acetyl [S54]	[R].HQGVMVGMGQKDSYVGDEAQSK.[R]	48.2759	25	1877	3	5592.28	42	377	3.2
2	High	4809279	annexin A7 isoform 2 [Homo sapiens]	Acetyl [S394]	[R].DLLSSVSR.[E]	20.9016	9	50	9	150.43	52.7	488	2.39
3	High		annexin A7 isoform 2 [Homo sapiens]	Acetyl [S396]	[R].DLLSSVSR.[E]	20.9016	9	50	9	150.43	52.7	488	2.39
4	High	56549668	AT-rich interactive domain-containing protein 2 [Homo sapiens]	Acetyl [S297]	[R].NLSFEEGNVK.[L]	0.980926	2	3	2	6.5	197.3	1835	2.03
5	High	4557481	canalicular multispecific organic anion transporter 1 [Homo sapiens]	Acetyl [S844]	[K].GSYSALLAK.[K]	9.32039	8	27	8	89.3	174.1	1545	2.49
6	High		canalicular multispecific organic anion transporter 1 [Homo sapiens]	Acetyl [S846]	[K].GSYSALLAK.[K]	9.32039	8	27	8	89.3	174.1	1545	2.49
7	High	4503685	farnesyl pyrophosphate synthase isoform a [Homo sapiens]	Acetyl [S73]	[R].MNGDQNSDVYAQEK.[Q]	5.48926	2	5	2	9.49	48.2	419	1.73
8	High	167466173	heat shock 70 kDa protein 1A/1B [Homo sapiens]	Acetyl [S106]	[K].VQVSYKGETK.[A]	67.8627	38	967	32	3147.38	641	70	3.35
9	High	20336761	heme-binding protein 1 [Homo sapiens]	Acetyl [S116]	[R].IPNQFQSDPPAPSDKSVKIEER.[E]	16.9312	3	5	3	7.36	21.1	189	3.47
10	High	70778918	inter-alpha-trypsin inhibitor heavy chain H2 precursor [Homo sapiens]	Acetyl [S83]	[K].VQSTITSR.[M]	4.75687	4	7	4	19.38	106.4	946	2.74
11	High	38045910	laminin subunit alpha-3 isoform 1 precursor [Homo sapiens]	Acetyl [S2164]	[R].NASGDELVR.[C]	1.62016	5	9	5	30.63	366.4	3333	2.4
12	High	4557707	neural cell adhesion molecule L1 isoform 1 precursor [Homo sapiens]	Acetyl [S664]	[K].EMAPEKWYSLGKVPGNQTSTTLK.[L]	8.83055	8	17	8	45.05	139.9	1257	2.43
13	High	14141168	poly(rC)-binding protein 2 isoform a [Homo sapiens]	Acetyl [S84]	[K].AFAMIIDKLEEDISSSMTNSTAASRPPVTLR.[L]	58.7432	14	299	10	860.83	38.6	366	4.29
14	High	578831328	PREDICTED: actin, cytoplasmic 2 isoform X1 [Homo sapiens]	Acetyl [S145]	[R].HQGVMVGMGQKDSYVGDEAQSK.[R]	70.7265	39	3568	12	12327.2	51.2	468	3.2
15	High		PREDICTED: actin, cytoplasmic 2 isoform X1 [Homo sapiens]	Acetyl [S393]	[K].DLYANTVLSGGTTMYPGIADR.[M]	70.7265	39	3568	12	12327.2	51.2	468	3.53
16	High	578808374	PREDICTED: biorientation of chromosomes in cell division protein 1-like 1 isoform X3 [Homo sapiens]	Acetyl [S810]	[K].DGKPVSEYIIK.[T]	1.02828	2	3	2	10.01	337.1	3112	2.01
17	High	530361113	PREDICTED: heterochromatin protein 1-binding protein 3 isoform X3 [Homo sapiens]	Acetyl [S465]	[K].SPGKAASVK.[Q]	30.9222	16	110	16	286.61	553	61.2	1.89
18	High		PREDICTED: heterochromatin protein 1-binding protein 3 isoform X3 [Homo sapiens]	Acetyl [S471]	[K].SPGKAASVK.[Q]	30.9222	16	110	16	286.61	553	61.2	1.89
19	High	578839603	PREDICTED: HLA class I histocompatibility antigen, alpha chain G isoform X1 [Homo sapiens]	Acetyl [S167]	[R].SWTAADTAAQISK.[R]	10.6936	2	4	2	12.96	38.9	346	4.08
20	High	530383554	PREDICTED: monofunctional C1-tetrahydrofolate synthase, mitochondrial isoform X4 [Homo sapiens]	Acetyl [S570]	[R].LDIDPSTITWQR.[V]	16	9	50	9	177.41	106.7	987	4.09
21	High	530410341	PREDICTED: myosin-10 isoform X1 [Homo sapiens]	Acetyl [S1044]	[R].IAECSSQLAEEEEKAK.[N]	15.1968	23	278	11	873.38	232.4	2007	3.49
22	High	578815313	PREDICTED: pericentriolar material 1 protein isoform X14 [Homo sapiens]	Acetyl [S1386]	[K].ASAQASLASKDK.[T]	2.23256	3	4	3	12.89	242.3	2150	2.52
23	High	578827402	PREDICTED: SAFB-like transcription modulator isoform X3 [Homo sapiens]	Acetyl [S1028]	[R].EVSGHSVR.[G]	1.56522	2	6	2	15.38	129.7	1150	2.58
24	High	578801849	PREDICTED: ubiquitin-associated protein 2-like isoform X19 [Homo sapiens]	Acetyl [S1003]	[K].TQQSFEK.[Q]	12.468	8	30	8	83.19	1171	123.9	2.51
25	High	32483399	serine/threonine-protein kinase PAK 2 [Homo sapiens]	Acetyl [S42]	[K].DPLSANHSLKPLPSVPEEK.[K]	18.1298	6	14	6	48.17	58	524	2.15
26	High	401461775	trafficking protein particle complex subunit 3 isoform 2 [Homo sapiens]	Acetyl [S50]	[K].ILFSNFLPR.[G]	17.0213	3	6	3	20.11	21.2	188	2.22
27	High	5803187	transaldolase [Homo sapiens]	Acetyl [S13]	[R].MESALDQLK.[Q]	52	20	394	20	337	37.5	1039.78	2.02
28	High	347360922	transformation/transcription domain-associated protein isoform 1 [Homo sapiens]	Acetyl [S3255]	[K].LLLNLISQVGR.[V]	0.958798	3	4	3	10.53	437.3	3859	2.72
29	High	4507729	tubulin beta-2A chain [Homo sapiens]	Acetyl [S364]	[K].MSATFIGNSTAIQELFK.[R]	67.8652	28	1071	2	3651.26	49.9	445	4.04
30	High	29788768	tubulin beta-2B chain [Homo sapiens]	Acetyl [S364]	[K].MSATFIGNSTAIQELFK.[R]	67.8652	28	1063	2	3622.19	49.9	445	4.04
31	High	5174735	tubulin beta-4B chain [Homo sapiens]	Acetyl [S364]	[K].MSATFIGNSTAIQELFK.[R]	75.7303	31	1294	2	4346.86	49.8	445	4.04
		Total modified proteins	27
		4 modified on two serine

## Sheet: Acetylation N-terminus
#SI	Protein FDR Confidence	Accession number	Protein name	Modifications and Sites	Peptides	Coverage [%]	# Peptides	# PSMs	# Unique Peptides	Score Sequest HT	MW [kDa]	# AAs	XCorr
1	High	5729991	26S protease regulatory subunit 6B isoform 1 [Homo sapiens]	Acetyl [N-Term]	[-].MEEIGILVEK.[A]	27.9904	10	80	10	202.24	47.3	418	3.39
2	High	61744477	4F2 cell-surface antigen heavy chain isoform b [Homo sapiens]	Acetyl [N-Term]	[-].MELQPPEASIAVVSIPR.[Q]	43.8986	22	468	22	1560.67	68.1	631	2.75
3	High	578840284	Active breakpoint cluster region-related protein isoform X3 [Homo sapiens]	Acetyl [N-Term]	[-].MEEEEEAIGLLDK.[V]	3.13631	2	7	2	11.32	93.8	829	2.94
4	High	37594464	ADP-sugar pyrophosphatase [Homo sapiens]	Acetyl [N-Term]	[-].MESQEPTESSQnGK.[Q]	22.3744	4	30	4	75.67	24.3	219	1.32
5	High	5031569	alpha-centractin [Homo sapiens]	Acetyl [N-Term]	[-].MESYDVIANQPVV IDNGSGVIK.[A]	25.266	6	62	4	216.76	42.6	376	4.62
6	High	20127454	bifunctional purine biosynthesis protein PURH [Homo sapiens]	Acetyl [N-Term]	[-].MAPGQLALFSVSDK.[T]	59.1216	25	206	25	562.09	64.6	592	1.8
7	High	7706337	coatomer subunit zeta-1 isoform 1 [Homo sapiens]	Acetyl [N-Term]	[-].MEALILEPSLYTVK.[A]	35.5932	5	47	5	172.81	20.2	177	3.15
8	High	510937025	dynamin-1-like protein isoform 5 [Homo sapiens]	Acetyl [N-Term]	[-].MEALIPVINK.[L]	18.6916	11	61	11	166.44	83.3	749	2.92
9	High	540344515	EH domain-containing protein 1 isoform 1 [Homo sapiens]	Acetyl [N-Term]	[-].MFSWVSK.[D]	38.5768	15	46	13	109.87	60.6	534	1.53
10	High	13489093	elongation of very long chain fatty acids protein 1 isoform 1 [Homo sapiens]	Acetyl [N-Term]	[-].MEAVVNLYQEVMK.[H]	17.2043	4	11	4	25.82	32.6	279	3.1
11	High	4557553	emerin [Homo sapiens]	Acetyl [N-Term]	[-].MDNYADLSDTELTTLLR.[R]	34.6457	7	36	7	98.34	29	254	3.82
12	High	33239445	eukaryotic translation initiation factor 3 subunit B [Homo sapiens]	Acetyl [N-Term]	[-].MQDAENVAVPEAAEER.[A]	38.2064	22	118	22	352.01	92.4	814	2.76
13	High	289577080	eukaryotic translation initiation factor 4 gamma 2 isoform 1 [Homo sapiens]	Acetyl [N-Term]	[-].MESAIAEGGASR.[F]	15.1047	11	49	11	140.08	102.3	907	1.47
14	High	29029559	exportin-2 isoform 1 [Homo sapiens]	Acetyl [N-Term]	[-].MELSDANLQTLTEYLK.[K]	32.1318	27	155	27	393.44	110.3	971	4.02
15	High	41872631	fatty acid synthase [Homo sapiens]	Acetyl [N-Term]	[-].MEEVVIAGMSGK.[L]	31.6607	56	399	56	1060.93	273.3	2511	3.36
16	High	9624998	heterogeneous nuclear ribonucleoprotein H2 [Homo sapiens]	Acetyl [N-Term]	[-].MMLSTEGR.[E]	23.3853	8	177	3	677.16	49.2	449	0.87
17	High	215490089	histone deacetylase complex subunit SAP18 [Homo sapiens]	Acetyl [N-Term]	[-].MLAAGVGGQGER.[L]	23.2558	3	4	3	12.39	19.5	172	1.71
18	High	4885371	histone H1.0 [Homo sapiens]	Acetyl [N-Term]	[-].MTENSTSAPAAKPK.[R]	17.0103	3	33	3	78.58	20.8	194	2.32
19	High	62460637	importin-4 [Homo sapiens]	Acetyl [N-Term]	[-].MESAGLEQLLR.[E]	9.62072	7	32	7	76.74	118.6	1081	3.32
20	High	10190716	kinetochore protein Spc25 [Homo sapiens]	Acetyl [N-Term]	[-].MVEDELALFDK.[S]	10.2679	2	4	2	10.93	26.1	224	2.03
21	High	151108473	mitochondrial fission 1 protein [Homo sapiens]	Acetyl [N-Term]	[-].MEAVLNELVSVEDLLK.[F]	26.3158	3	13	3	37.62	16.9	152	3.75
22	High	11024700	mitochondrial import inner membrane translocase subunit Tim13 [Homo sapiens]	Acetyl [N-Term]	[-].MEGGFGSDFGGSGSGK.[L]	53.6842	4	25	4	61.89	10.5	95	3.52
23	High	10092657	NADH dehydrogenase [ubiquinone] 1 alpha subcomplex subunit 12 isoform a [Homo sapiens]	Acetyl [N-Term]	[-].MELVQVLK.[R]	33.7931	4	33	4	89.48	17.1	145	3.45
24	High	4505143	NADP-dependent malic enzyme [Homo sapiens]	Acetyl [N-Term]	[-].MEPEAPR.[R]	18.1818	6	21	6	56.46	64.1	572	1.85
25	High	4826860	NHP2-like protein 1 [Homo sapiens]	Acetyl [N-Term]	[-].MTEADVNPK.[A]	57.0312	6	56	6	169.82	14.2	128	2.1
26	High	5031977	nicotinamide phosphoribosyltransferase precursor [Homo sapiens]	Acetyl [N-Term]	[-].MNPAAEAEFNILLATDSYK.[V]	47.6578	16	108	16	268.19	55.5	491	2.28
27	High	157426879	nuclear protein localization protein 4 homolog [Homo sapiens]	Acetyl [N-Term]	[-].MAESIIIR.[V]	7.07237	4	9	4	15.65	68.1	608	2.42
28	High	10835063	nucleophosmin isoform 1 [Homo sapiens]	Acetyl [N-Term]	[-].MEDSMDMDMSP LRPQNYLFGCELK.[A]	69.0476	21	550	21	1839.69	32.6	294	4.13
29	High	10863927	peptidyl-prolyl cis-trans isomerase A [Homo sapiens]	Acetyl [N-Term]	[-].MVNPTVFFDIAVDGEPLGR.[V]	71.5152	12	427	4	1303.18	18	165	3.95
30	High	209862851	plastin-3 isoform 1 [Homo sapiens]	Acetyl [N-Term]	[-].MDEMATTQISKDELDELK.[E]	47.9365	27	182	23	491.58	70.8	630	3.74
31	High	530407503	PREDICTED: ataxin-2-like protein isoform X2 [Homo sapiens]	Acetyl [N-Term]	[-].MLKPQPLQQPSQPQ QPPPTQQAVAR.[R]	6.15942	4	11	4	19.94	116.3	1104	3.83
32	High	530417333	PREDICTED: calpain small subunit 1 isoform X1 [Homo sapiens]	Acetyl [N-Term]	[-].MFLVNSFLK.[G]	42.8571	9	91	9	259.59	33.8	322	3.01
33	High	530416195	PREDICTED: charged multivesicular body protein 2a isoform X2 [Homo sapiens]	Acetyl [N-Term]	[-].MDLLFGR.[R]	15.4717	4	8	4	15.81	29.6	265	2.46
34	High	578799206	PREDICTED: endophilin-B1 isoform X1 [Homo sapiens]	Acetyl [N-Term]	[-].MNIMDFNVK.[K]	8.70647	3	3	3	6.32	45.2	402	1.26
35	High	578819373	PREDICTED: heterogeneous nuclear ribonucleoprotein H3 isoform X8 [Homo sapiens]	Acetyl [N-Term]	[-].MDWVMK.[H]	34.6821	8	146	8	492.28	36.9	346	2.19
36	High	530395319	PREDICTED: integrin-linked protein kinase isoform X3 [Homo sapiens]	Acetyl [N-Term]	[-].MDDIFTQcR.[E]	10.6195	4	19	4	53.94	51.4	452	2.75
37	High	578830872	PREDICTED: junction plakoglobin isoform X7 [Homo sapiens]	Acetyl [N-Term]	[-].MEVMNLMEQPIK.[V]	55.0336	28	145	22	428.32	81.7	745	2.36
38	High	578811455	PREDICTED: leukocyte elastase inhibitor isoform X1 [Homo sapiens]	Acetyl [N-Term]	[-].MEQLSSANTR.[F]	29.8153	9	63	8	176.22	42.7	379	2.51
39	High	530412393	PREDICTED: luc7-like protein 3 isoform X1 [Homo sapiens]	Acetyl [N-Term]	[-].MISAAQLLDELMGR.[D]	11.6564	4	12	4	20.18	58.2	489	2.8
40	High	530368148	PREDICTED: macrophage-capping protein isoform X1 [Homo sapiens]	Acetyl [N-Term]	[-].MYTAIPQSGSPFPGSVQ DPGLHVWRVEK.[L]	35.9195	12	199	12	587.64	38.5	348	2.5
41	High	530410136	PREDICTED: protein flightless-1 homolog isoform X1 [Homo sapiens]	Acetyl [N-Term]	[-].MEATGVLPFVR.[G]	10.0309	8	34	8	89.77	147.5	1296	2.95
42	High	578828051	PREDICTED: serine/arginine repetitive matrix protein 2 isoform X6 [Homo sapiens]	Acetyl [N-Term]	[-].MYNGIGLPTPR.[G]	8.57558	15	52	15	130.3	299.4	2752	1.24
43	High	14211889	protein dpy-30 homolog [Homo sapiens]	Acetyl [N-Term]	[-].MEPEQMLEGQTQVAEN PHSEYGLTDNVER.[I]	54.5455	3	18	3	57.51	11.2	99	5.02
44	High	4505087	protein mago nashi homolog [Homo sapiens]	Acetyl [N-Term]	[-].MESDFYLR.[Y]	52.0548	6	33	6	86.49	17.2	146	2.93
45	High	31543091	protein MAK16 homolog [Homo sapiens]	Acetyl [N-Term]	[-].MQSDDVIWDTLGNK.[Q]	13.6667	3	14	3	33.07	35.3	300	3.43
46	High	22538446	quinone oxidoreductase PIG3 isoform 1 [Homo sapiens]	Acetyl [N-Term]	[-].MLAVHFDKPGGPENLYVK.[E]	15.3614	4	21	4	68.99	35.5	332	4.63
47	High	6598323	rab GDP dissociation inhibitor beta isoform 1 [Homo sapiens]	Acetyl [N-Term]	[-].MNEEYDVIVLGTGLTEC ILSGIMSVNGK.[K]	82.9213	36	503	25	1456.11	50.6	445	3.16
48	High	13569962	ras-related protein Rab-1B [Homo sapiens]	Acetyl [N-Term]	[-].MNPEYDYLFK.[L]	75.6219	13	183	5	495.99	22.2	201	2.13
49	High	429836839	signal peptidase complex catalytic subunit SEC11A isoform 3 [Homo sapiens]	Acetyl [N-Term]	[-].MLSLDFLDDVR.[R]	15.1351	3	16	3	50.94	21.4	185	2.65
50	High	5803181	stress-induced-phosphoprotein 1 isoform b [Homo sapiens]	Acetyl [N-Term]	[-].MEQVNELK.[E]	46.4088	31	291	31	829.92	62.6	543	3.1
51	High	57863257	T-complex protein 1 subunit alpha isoform a [Homo sapiens]	Acetyl [N-Term]	[-].MEGPLSVFGDR.[S]	55.9353	26	300	26	881.58	60.3	556	2.73
52	High	63162572	T-complex protein 1 subunit gamma isoform a [Homo sapiens]	Acetyl [N-Term]	[-].MMGHRPVLVLSQNTK.[R]	56.3303	23	283	23	805.18	60.5	545	4.28
53	High	21361091	ubiquitin carboxyl-terminal hydrolase isozyme L1 [Homo sapiens]	Acetyl [N-Term]	[-].MQLKPMEINPEMLNK.[V]	73.0942	10	242	10	755.81	24.8	223	2.97
		53 proteins

## Sheet: Allysine
#SI	Protein FDR Confidence	Accession number	Protein name	Modifications and Sites	Peptide	Coverage [%]	# Peptides	# PSMs	# Unique Peptides	Score Sequest HT	MW [kDa]	# AAs	XCorr (by Search Engine): Sequest HT (of peptide)
1	High	5803225	14-3-3 protein epsilon [Homo sapiens]	Lys->Allysine [K244]	[R].DNLTLWTSDMQGDGEEQNKEALQDVEDENK.[V]	75.2941	28	718	25	2081.5	29.2	255	4.82
2	High	4758504	3-hydroxyacyl-CoA dehydrogenase type-2 isoform 1 [Homo sapiens]	Lys->Allysine [K172]	[R].GVIINTASVAAFEGQVGQAAYSASK.[G]	88.5057	15	223	15	858.7	26.9	261	5.69
3	High	13904870	40S ribosomal protein S5 [Homo sapiens]	Lys->Allysine [K182]	[K].TIAECLADELINAAKGSSNSYAIK.[K]	59.3137	10	215	10	664.99	22.9	204	3.59
4	High	41399285	60 kDa heat shock protein, mitochondrial [Homo sapiens]	Lys->Allysine [K417]	[K].VGGTSDVEVNEKK.[D]	82.3735	48	1714	48	6288.91	61	573	4.2
5	High	4503571	alpha-enolase isoform 1 [Homo sapiens]	Lys->Allysine [K326]	[K].FTASAGIQVVGDDLTVTNPKR.[I]	85.9447	40	1366	35	4819.17	47.1	434	3.71
6	High	100913206	ATP-dependent RNA helicase A [Homo sapiens]	Lys->Allysine [K314]	[K].DLEHQLQNIIQELNLEILPPPEDPSVPVALNIGKLAQFEPSQR.[Q]	50.7874	45	449	45	1404.63	140.9	1270	3.99
7	High	148539846	desmocollin-3 isoform Dsc3a preproprotein [Homo sapiens]	Lys->Allysine [K381]	[R].IPIEDKDLINTANWR.[V]	5.58036	5	17	5	55.03	99.9	896	4.23
8	High	91199540	dihydrolipoyl dehydrogenase, mitochondrial isoform 1 precursor [Homo sapiens]	Lys->Allysine [K320]	[R].RPFTKNLGLEELGIELDPR.[G]	35.9528	14	118	14	380.77	54.1	509	3.15
9	High	4503607	electron transfer flavoprotein subunit alpha, mitochondrial isoform a [Homo sapiens]	Lys->Allysine [K203]	[K].ASSTSPVEISEWLDQKLTK.[S]	61.2613	15	315	15	1025.17	35.1	333	3
10	High	7669492	glyceraldehyde-3-phosphate dehydrogenase isoform 1 [Homo sapiens]	Lys->Allysine [K309]	[K].GILGYTEHQVVSSDFNSDTHSSTFDAGAGIALNDHFVK.[L]	83.5821	23	1128	23	3685.39	36	335	6.37
11	High	261878575	guanine nucleotide-binding protein G(i) subunit alpha-2 isoform 2 [Homo sapiens]	Lys->Allysine [K14]	[R].GAGESGKSTIVK.[Q]	22.327	6	34	4	94.57	36.4	318	2.66
12	High		guanine nucleotide-binding protein G(i) subunit alpha-2 isoform 2 [Homo sapiens]	Lys->Allysine [K9]	[R].GAGESGKSTIVK.[Q]	22.327	6	34	4	94.57	36.4	318	2.66
13	High	5729877	heat shock cognate 71 kDa protein isoform 1 [Homo sapiens]	Lys->Allysine [K159]	[R].QATKDAGTIAGLNVLR.[I]	76.4706	51	2190	35	7511.4	70.9	646	3.87
14	High		heat shock cognate 71 kDa protein isoform 1 [Homo sapiens]	Lys->Allysine [K25]	[K].GPAVGIDLGTTYSCVGVFQHGK.[V]	76.4706	51	2190	35	7511.4	70.9	646	3.69
15	High		heat shock cognate 71 kDa protein isoform 1 [Homo sapiens]	Lys->Allysine [K328]	[K].LDKSQIHDIVLVGGSTR.[I]	76.4706	51	2190	35	7511.4	70.9	646	4.07
16	High		heat shock cognate 71 kDa protein isoform 1 [Homo sapiens]	Lys->Allysine [K384]	[K].SINPDEAVAYGAAVQAAILSGDK.[S]	76.4706	51	2190	35	7511.4	70.9	646	2.98
17	High	4504517	heat shock protein beta-1 [Homo sapiens]	Lys->Allysine [K141]	[R].KYTLPPGVDPTQVSSSLSPEGTLTVEAPMPK.[L]	58.5366	11	249	11	717.12	22.8	205	3.64
18	High	52632383	heterogeneous nuclear ribonucleoprotein L isoform a [Homo sapiens]	Lys->Allysine [K178]	[R].QALVEFEDVLGACNAVNYAADNQIYIAGHPAFVNYSTSQK.[I]	67.5722	23	304	22	964.45	64.1	589	5.06
19	High	296179427	hydroxyacyl-coenzyme A dehydrogenase, mitochondrial isoform 1 precursor [Homo sapiens]	Lys->Allysine [K125]	[K].TLSTIATSTDAASVVHSTDLVVEAIVENLKVK.[N]	40.4834	7	21	7	72.85	36	331	4.88
20	High	27436946	lamin isoform A [Homo sapiens]	Lys->Allysine [K135]	[R].LKDLEALLNSKEAALSTALSEK.[R]	67	53	1737	3	5442.43	74.1	664	3.63
21	High	291575128	L-lactate dehydrogenase B chain [Homo sapiens]	Lys->Allysine [K229]	[K].LGIHPSSCHGWILGEHGDSSVAVWSGVNVAGVSLQELNPEMGTDNDSENWKEVHK.[L]	83.2335	23	695	21	2076.84	36.6	334	5.23
22	High	12667788	myosin-9 [Homo sapiens]	Lys->Allysine [K1295]	[K].LQVELDNVTGLLSQSDSKSSK.[L]	54.4388	101	1666	86	5571.78	226.4	1960	3.34
23	High	530392189	PREDICTED: 6-phosphofructokinase type C isoform X1 [Homo sapiens]	Lys->Allysine [K281]	[R].LNIIIVAEGAIDTQNKPITSEKIK.[E]	38.6826	24	238	21	763.98	90.8	835	3.85
24	High	578808374	PREDICTED: biorientation of chromosomes in cell division protein 1-like 1 isoform X3 [Homo sapiens]	Lys->Allysine [K807]	[K].DGKPVSEYIIK.[T]	1.02828	2	3	2	10.01	337.1	3112	2.01
25	High	530429490	PREDICTED: flotillin-1 isoform X1 [Homo sapiens]	Lys->Allysine [K51]	[R].ISLNTLTLNVKSEK.[V]	29.274	9	36	9	137.76	47.3	427	3.73
26	High	530410341	PREDICTED: myosin-10 isoform X1 [Homo sapiens]	Lys->Allysine [K1052]	[R].IAECSSQLAEEEEKAK.[N]	15.1968	23	278	11	873.38	232.4	2007	3.49
27	High	23110955	pro-cathepsin H preproprotein [Homo sapiens]	Lys->Allysine [K291]	[K].VNHAVLAVGYGEKNGIPYWIVK.[N]	11.9403	3	3	3	8.67	37.4	335	2.27
28	High	21361176	retinal dehydrogenase 1 [Homo sapiens]	Lys->Allysine [K410]	[K].EEIFGPVQQIMKFK.[S]	77.0459	33	1796	30	5848.72	54.8	501	3.55
29	High	32483399	serine/threonine-protein kinase PAK 2 [Homo sapiens]	Lys->Allysine [K38]	[K].DPLSANHSLKPLPSVPEEK.[K]	18.1298	6	14	6	48.17	58	524	2.15
30	High	55749531	splicing factor 3B subunit 2 [Homo sapiens]	Lys->Allysine [K697]	[K].IPGLNSPIPESCSFGYHAGGWGKPPVDETGK.[T]	25.6983	14	101	14	313.55	100.2	895	6.58
31	High	98986464	transmembrane emp24 domain-containing protein 10 precursor [Homo sapiens]	Lys->Allysine [K145]	[K].LKPLEVELR.[R]	37.4429	8	47	8	161.12	25	219	2.86
32	High	20127408	trifunctional enzyme subunit alpha, mitochondrial precursor [Homo sapiens]	Lys->Allysine [K440]	[R].DSIFSNLTGQLDYQGFEK.[A]	53.4731	26	390	26	1248.19	82.9	763	3.69
33	High	25188179	voltage-dependent anion-selective channel protein 3 isoform 1 [Homo sapiens]	Lys->Allysine [K109]	[K].LTLDTIFVPNTGKK.[V]	49.47	9	147	8	483.53	30.6	283	4.02
		29 proteins
