# Supplementary material for: Acetylation, Methylation and Allysine Modification Profile of Viral and Host Proteins during Influenza A Virus Infection
Source: Viruses. 2021 Jul 20;13(7):1415. doi: 10.3390/v13071415 (PMC8310381; doi:10.3390/v13071415)
Supplement: Supplementary file 1 [file viruses-13-01415-s001.zip › viruses-1281647-supplementary/Supplementary_Table S5.xlsx]

## Sheet: Methyltaion
#No	#SI	Accession	Description	Modifications	Peptide	Human	Pig	Mouse	Dog	Horse	Chicken
1	1	5803227	14-3-3 protein theta	Methyl [R55]	[R].NLLSVAYKNVVGGRR.[S]	R	R	R	R	R	R
2	2		14-3-3 protein theta	Methyl [K212]	[K].TAFDEAIAELDTLNEDSYKDSTLIMQLLR.[D]	K	K	K	K	K	K
3	3	4826952	26S proteasome non-ATPase regulatory subunit 5 isoform 1	Methyl [K493]	[R].TYLSEGPYYVKPVSTTAVEGAE.[-]	K	K	K	K	K	K
4	4	167614485	3-ketoacyl-CoA thiolase, mitochondrial	Methyl [R360]	[K].TNVNGGAIALGHPLGGSGSRITAHLVHELR.[R]	R	R	R	R	R	R
5	5	41399285	60 kDa heat shock protein, mitochondrial	Methyl [K387]	[R].IQEIIEQLDVTTSEYEKEK.[L]	K	K	K	K	K	K
6	6		60 kDa heat shock protein, mitochondrial	Methyl [ K389]	[R].IQEIIEQLDVTTSEYEKEK.[L]	K	K	K	K	K	K
7	7	4506671	60S acidic ribosomal protein P2	Methyl [K21]	[R].YVASYLLAALGGNSSPSAKDIK.[K]	K	K	K	K	K	K
8	8	4506597	60S ribosomal protein L12	Methyl [R146]	[K].EILGTAQSVGCNVDGR.[H]	R	R	R	R	R	R
9	9	15431295	60S ribosomal protein L13 isoform 1	Methyl [R158]	[K].LATQLTGPVMPVRNVYK.[K]	R	R	R	R	R	R
10	10	6005860	60S ribosomal protein L35	Methyl [K25]	[K].QLDDLKVELSQLR.[V]	K	K	K	K	K	K
11	11	4501867	aconitate hydratase, mitochondrial precursor	Methyl [K138]	[K].VAVPSTIHCDHLIEAQVGGEKDLR.[R]	K	K	K	K	K	K
12	12		aconitate hydratase, mitochondrial precursor	Methyl [K245]	[K].LTGSLSGWSSPKDVILK.[V]	K	K	K	K	K	K
13	13	4501881	actin, alpha skeletal muscle	Methyl [R256]	[KR].SYELPDGQVITIGNERFR.[C]	R	R	R	R	R	R
14	14	4502049	aldo-keto reductase family 1 member B1 isoform 1	Dimethyl [K12]	[R].LLLNNGAK.[M]	K	K	K	N/A	K	K
15	15		aldo-keto reductase family 1 member B1 isoform 1	Methyl [K195]	[K].YKPAVNQIECHPYLTQEKLIQYCQSK.[G]	K	K	K	N/A	K	K
16	16	24497583	aldo-keto reductase family 1 member C3 isoform 1	Methyl [K294]	[R].QNVQVFEFQLTAEDMKAIDGLD.[R]	K	K	A	E	K	S
17	17	4501891	alpha-actinin-1 isoform b	Methyl [K633]	[R].KQFGAQANVIGPWIQTK.[M]	K	K	K	K	K	K
18	18		alpha-actinin-1 isoform b	Methyl [K682]	[K].SIVNYKPKIDQLEGDHQLIQEALIFDNK.[H]	K	K	K	K	K	K
19	19		alpha-actinin-1 isoform b	Methyl [K684]	[K].SIVNYKPKIDQLEGDHQLIQEALIFDNK.[H]	K	K	K	K	K	K
20	20	585866354	alpha-actinin-3 isoform 1	Methyl [R740]	[R].VGWEQLLTSIARTINEVENQVLTR.[D]	R	N/A	R	R	R	N/A
21	21	12025678	alpha-actinin-4	Methyl [K450]	[R].DYETATLSDIKALIR.[K]	K	K	K	K	K	K
22	22	12025678	alpha-actinin-4	Methyl [K668]	[R].QFASQANVVGPWIQTKMEEIGIR.[I]	K	K	K	K	K	K
23	23	4503571	alpha-enolase isoform 1	Methyl [K80]	[K].AVEHINKTIAPALVSKK.[L]	K	K	Q	N/A	N/A	K
24	24		alpha-enolase isoform 1	Methyl [K221]	[K].DATNVGDEGGFAPNILENKEGLELLK.[T]	K	K	K	N/A	N/A	K
25	25		alpha-enolase isoform 1	Methyl [K228]	[K].YGKDATNVGDEGGFAPNILENKEGLELLK.[T]	K	K	K	N/A	N/A	K
26	26		alpha-enolase isoform 1	Methyl [R269]	[K].SPDDPSRYISPDQLADLYK.[S]	R	R	R	N/A	N/A	R
27	27		alpha-enolase isoform 1	Methyl [K358]	[K].VNQIGSVTESIQACK.[L]	K	K	K	N/A	N/A	K
28	28	224809478	ankycorbin isoform d	Methyl [K446]	[R].IQQLQEILQDLQKR.[L]	K	K	K	K	K	R
29	29		ankycorbin isoform d	Methyl [R447]	[R].IQQLQEILQDLQKR.[L]	R	R	R	R	R	K
30	30	4502101	annexin A1	Methyl [K26]	[K].QAWFIENEEQEYVQTVKSSK.[G]	K	K	K	K	K	K
31	31	168229252	asparagine synthetase [glutamine-hydrolyzing] isoform a	Trimethyl [K244]	[R].ILFNNAVKK.[R]	K	K	K	K	K	R
32	32	73486658	aspartate aminotransferase, mitochondrial isoform 1 precursor	Methyl [K94]	[K].NLDKEYLPIGGLAEFCK.[A]	K	K	H	K	N/A	K
33	33		aspartate aminotransferase, mitochondrial isoform 1 precursor	Methyl [K200]	[K].TCGFDFTGAVEDISK.[I]	K	K	N	K	N/A	K
34	34	4502303	ATP synthase subunit O, mitochondrial precursor	Methyl [R29]	[K].LVRPPVQVYGIEGR.[Y]	R	R	R	R	R	R
35	35		ATP synthase subunit O, mitochondrial precursor	Methyl [K158]	[R].GEVPCTVTSASPLEEATLSELKTVL.[K]	K	K	K	K	Q	K
36	36	63055057	beta-actin-like protein 2	Methyl [R255]	[KR].SYELPDGQVITIGNERFR.[C]	R	R	R	R	R	N/A
37	37	530410063	beta-enolase isoform 3	Methyl [K367]	[K].VNQIGSVTESIQACKLAQSNGWGVMVSHR.[S]	K	K	K	K	K	K
38	38	20127454	bifunctional purine biosynthesis protein PURH	Methyl [K406]	[K].SLFSNVVTK.[N]	K	K	K	K	K	K
39	39	192447432	carbonic anhydrase 1 isoform a	Methyl [R247]	[R].SLLSNVEGDNAVPMQHNNRPTQPLK.[G]	R	R	R	R	R	N/A
40	40		carbonic anhydrase 1 isoform a	Methyl [K253]	[R].SLLSNVEGDNAVPMQHNNRPTQPLK.[G]	K	K	K	K	K	N/A
41	41	4503143	cathepsin D preproprotein	Methyl [K222]	[R].ISVNNVLPVFDNLMQQKLVDQNIFSFYLSR.[D]	K	N/A	N/A	N/A	N/A	N/A
42	42		cathepsin D preproprotein	Methyl [K331]	[K].AIGAVPLIQGEYMIPCEKVSTLPAITLK.[L]	K	N/A	N/A	N/A	N/A	N/A
43	43	11067747	cell division cycle 5-like protein	Methyl [R351]	[R].QTAEESGITNSASSTLLSEYNVTNNSVALR.[T]	R	R	R	R	R	R
44	44	21536286	creatine kinase B-type	Methyl [K32]	[K].LRFPAEDEFPDLSAHNNHMAKVLTPELYAELR.[A]	K	K	K	K	K	K
45	45	4503047	cysteine-rich protein 1	Methyl [K49]	[K].TLTSGGHAEHEGKPYCNHPCYAAMFGPK.[G]	K	K	K	K	K	K
46	46		cysteine-rich protein 1	Methyl [K64]	[K].TLTSGGHAEHEGKPYCNHPCYAAMFGPK.[G]	K	K	K	K	K	K
47	47	33350932	cytoplasmic dynein 1 heavy chain 1	Methyl [K3747]	[R].QLEKSLLQALNEVK.[G]	K	K	K	K	K	K
48	48	19913406	DNA topoisomerase 2-alpha	Methyl [K321]	[K].GFQQISFVNSIATSKGGR[H]	K	K	K	K	K	K
49	49	4503471	elongation factor 1-alpha 1	Methyl [K165]	[K].MDSTEPPYSQKR.[Y]	K	K	K	K	K	K
50	50		elongation factor 1-alpha 1	Methyl [R166]	[K].MDSTEPPYSQKR.[Y]	R	R	R	R	R	R
51	51	4503475	elongation factor 1-alpha 2	Methyl [K79]	[R].GITIDISLWKFETTK.[Y]	K	K	K	K	K	K
52	52		elongation factor 1-alpha 2	Methyl [K84]	[R].GITIDISLWKFETTKYYITIIDAPGHR.[D]	K	K	K	K	K	K
53	53	20070264	endoplasmic reticulum lectin 1 isoform 1 precursor	Methyl [K328]	[K].SIAIGSQPVLTVGTTHISKLTDDQLIK.[E]	K	K	K	K	K	K
54	54	4507677	endoplasmin precursor	Methyl [K114]	[R].ELISNASDALDKIR.[L]	K	K	K	K	K	K
55	55		endoplasmin precursor	Methyl [K479]	[K].IADDKYNDTFWKEFGTNIK.[L]	K	K	K	K	K	K
56	56	4503509	eukaryotic translation initiation factor 3 subunit A	Methyl [K264]	[K].AVEDIHGLFSLSKK.[P]	K	K	K	K	K	K
57	57	189083688	exosome complex component RRP42	Methyl [K276]	[K].VLHASLQSVVHKEESLGPK.[R]	K	K	K	K	K	E
58	58	41872631	fatty acid synthase	Methyl [R1507]	[K].VLQGDLVMNVYRDGAWGAFR.[H]	R	R	R	-	R	R
59	59	16933542	fibronectin isoform 3 preproprotein	Methyl [R1301]	[R].VTWAPPPSIDLTNFLVRYSPVK.[N]	R	N/A	R	R	N/A	R
60	60	160420317	filamin-A isoform 2	Methyl [K900]	[R].TGVELGKPTHFTVNAKAAGK.[G]	K	K	K	K	K	K
61	61		filamin-A isoform 2	Methyl [R1532]	[R].EGPYSISVLYGDEEVPRSPFK.[V]	R	R	R	R	R	R
62	62		filamin-A isoform 2	Methyl [K2133]	[K].FADQHVPGSPFSVKVTGEGR.[V]	K	K	K	K	K	K
63	63	4502419	flavin reductase (NADPH)	Methyl [R92]	[R].NDLSPTTVMSEGARNIVAAMK.[A]	R	R	R	N/A	N/A	N/A
64	64	342187211	fructose-bisphosphate aldolase A isoform 2	Methyl [K384]	[K].AAQEEYVKR.[A]	K	K	K	K	K	-
65	65	4758484	glutathione S-transferase omega-1 isoform 1	Methyl [R48]	[K].GIRHEVININLK.[N]	R	R	R	R	R	R
66	66		glutathione S-transferase omega-1 isoform 1	Methyl [R132]	[K].VPSLVGSFIRSQNK.[E]	R	R	R	R	R	K
67	67	7669492	glyceraldehyde-3-phosphate dehydrogenase isoform 1	Methyl [K55]	[K].VDIVAINDPFIDLNYMVYMFQYDSTHGKFHGTV.[K]	K	K	K	K	K	H
68	68	167466173	heat shock 70 kDa protein 1B	Methyl [R469]	[R].FELSGIPPAPR.[G]	R	R	R	R	R	R
69	69	5729877	heat shock cognate 71 kDa protein isoform 1	Methyl [R469]	[K].FELTGIPPAPR.[G]	R	R	R	R	R	R
70	70		heat shock cognate 71 kDa protein isoform 1	Dimethyl [K357]	[K].LLQDFFNGKELNK.[S]	K	K	K	K	K	K
71	71	4504517	heat shock protein beta-1	Methyl [K112]	[R].VSLDVNHFAPDELTVKTK.[T]	K	K	K	K	K	K
72	72	13676857	heat shock-related 70 kDa protein 2	Methyl [K461]	[K].DNNLLGKFDLTGIPPAPR.[G]	K	K	K	K	K	N/A
73	73		heat shock-related 70 kDa protein 2	Dimethyl [K360]	[K].LLQDFFNGKELNK.[S]	K	K	K	K	K	N/A
74	74		heat shock-related 70 kDa protein 2	Methyl [R472]	[K].DNNLLGKFDLTGIPPAPR.[G]	R	R	R	R	R	N/A
75	75	55956921	heterogeneous nuclear ribonucleoprotein A/B isoform b	Methyl [R245]	[K].EVYQQQQYGSGGRGNR.[N]	R	R	R	G	G	G
76	76		heterogeneous nuclear ribonucleoprotein A/B isoform b	Methyl [R248]	[K].EVYQQQQYGSGGRGNR.[N]	R	R	R	D	D	S
77	77	5803036	heterogeneous nuclear ribonucleoprotein A0	Dimethyl [R291]	[R].SNSGPYRGGYGGGGGYGGSSF.[-]	R	R	R	R	R	R
78	78	4504445	heterogeneous nuclear ribonucleoprotein A1 isoform a	Dimethyl [R206]	[R].SGSGNFGGGRGGGFGGNDNFGRGGN.[F]	R	R	R	R	R	R
79	79		heterogeneous nuclear ribonucleoprotein A1 isoform a	Dimethyl [R218]	[R].SGSGNFGGGRGGGFGGNDNFGRGGN.[F]	R	R	R	R	R	R
80	80	530400152	PREDICTED: heterogeneous nuclear ribonucleoprotein A1 isoform X1	Methyl [K161]	[R].GFAFVTFDDHDSVDKIVIQK.[Y]	K	K	K	K	K	K
81	81		PREDICTED: heterogeneous nuclear ribonucleoprotein A1 isoform X1	Methyl [R194]	[K].QEMASASSSQRGR.[SR]	R	R	R	R	R	R
82	82		PREDICTED: heterogeneous nuclear ribonucleoprotein A1 isoform X1	Methyl [R196]	[K].QEMASASSSQRGR.[SR]	R	R	R	R	R	R
83	83	34740329	heterogeneous nuclear ribonucleoprotein A3	Methyl [R52]	[K].LFIGGLSFETTDDSLREHFEK.[W]	R	R	R	R	R	R
84	84	14110407	heterogeneous nuclear ribonucleoprotein D-like isoform a	Methyl [K161]	[K].MFIGGLSWDTSKK.[D]	K	K	K	K	K	K
85	85		heterogeneous nuclear ribonucleoprotein D-like isoform a	Methyl [K162]	[K].MFIGGLSWDTSKK.[D]	K	K	K	K	K	K
86	86	148470406	heterogeneous nuclear ribonucleoprotein F	Methyl [R114]	[K].HSGPNSADSANDGFVRLR.[G]	R	R	R	R	R	R
87	87	74136883	heterogeneous nuclear ribonucleoprotein U isoform a	Methyl [R590]	[R].NFILDQTNVSAAAQRR.[K]	R	N/A	R	R	R	R
88	88	530415584	heterogeneous nuclear ribonucleoprotein U-like protein 1 isoform X1	Methyl [K461]	[K].YNILGTNAIMDKMR.[V]	K	K	K	K	K	K
89	89	118601081	heterogeneous nuclear ribonucleoprotein U-like protein 2	Methyl [R684]	[R].AYGQQYWGQPGNRGGYR.[N]	R	R	R	R	R	R
90	90		heterogeneous nuclear ribonucleoprotein U-like protein 2	Methyl [R688]	[R].AYGQQYWGQPGNRGGYR.[N]	R	R	R	R	R	R
91	91	530384720	heterogeneous nuclear ribonucleoproteins A2/B1 isoform X1	Methyl [R213]	[R].GGNFGFGDSRGGGGNFGPGPGSNFR.[G]	R	R	R	R	R	R
92	92	393715082	inactive tyrosine-protein kinase 7 isoform e	Methyl [R246]	[R].VVLAPQDVVVAR.[Y]	R	R	R	R	R	K
93	93	153082755	interferon-induced protein with tetratricopeptide repeats 2	Methyl [K359]	[R].VCSILASLHALADQYEDAEYYFQKEFSK.[E]	K	K	K	K	K	N/A
94	94	28178832	isocitrate dehydrogenase [NADP], mitochondrial isoform 1 precursor	Methyl [K272]	[R].FKDIFQEIFDKHYK.[T]	K	N/A	K	K	K	K
95	95	118402586	lactoylglutathione lyase	Methyl [K78]	[K].FSLYFLAYEDKNDIPK.[E]	K	K	K	K	K	K
96	96	38045910	laminin subunit alpha-3 isoform 1 precursor	Methyl [R1968]	[K].QISGTDGEGNNVPSGDFSREWAEAQR.[M]	R	R	R	R	R	K
97	97	260099723	L-lactate dehydrogenase A chain isoform 3	Methyl [K110]	[K].IVSGKDYNVTANSK.[L]	K	K	K	K	K	K
98	98		L-lactate dehydrogenase A chain isoform 3	Methyl [K155]	[R].NVNIFKFIIPNVVKYSPNCK.[L]	K	K	K	Q	K	K
99	99	312283701	malate dehydrogenase, cytoplasmic isoform 1	Methyl [K238]	[K].EVGVYEALKDDSWLKGEFVTTVQQR.[G]	K	K	K	K	K	K
100	100		malate dehydrogenase, cytoplasmic isoform 1	Methyl [R248]	[K].EVGVYEALKDDSWLKGEFVTTVQQR.[G]	R	R	R	R	R	R
101	101	291327466	mRNA-decapping enzyme 1A isoform a	Methyl [R376]	[R].SPLLNQPVPELSHASLIANQSPFR.[A]	R	R	R	R	R	I
102	102	530397279	neuroblast differentiation-associated protein AHNAK isoform X1	Methyl [K707]	[K].ISMPDVDLHVKGTK.[V]	K	K	K	K	K	N/A
103	103	5032093	neutral amino acid transporter B(0) isoform 1	Methyl [K522]	[K].SELPLDPLPVPTEEGNPLLKHYR.[G]	K	N/A	K	N/A	N/A	N/A
104	104	55956788	nucleolin	Methyl [K333]	[K].TGISDVFAKNDLAVVDVR.[I]	K	K	K	K	K	K
105	105	32455266	peroxiredoxin-1	Methyl [K92]	[K].LNCQVIGASVDSHFCHLAWVNTPKK.[Q]	K	K	K	K	K	K
106	106	4505763	phosphoglycerate kinase 1	Methyl [K291]	[K].ITLPVDFVTADKFIQLINNMLDK.[V]	K	K	K	K	K	-
107	107	4505753	phosphoglycerate mutase 1	Methyl [K157]	[R].YADLTEDQLPSCESLKDTIAR.[A]	K	K	K	K	K	K
108	108	288915536	plastin-1	Methyl [K545]	[K].DKSISTSLPVLDLIDAIAPNAVR.[Q]	K	K	K	K	K	K
109	109	46367787	polyadenylate-binding protein 1	Dimethyl [R493]	[R].VANTSTQTMGPRPAAAAAAATPAVR.[T]	R	R	R	R	R	R
110	110	208431833	polyadenylate-binding protein 4 isoform 1	Methyl [R534]	[R].LAMDFGGAGAAQQGLTDSCQSGGVPTAVQNLAPRAAVAAAAPRAVAPYK.[Y]	K	K	N/A	K	K	N/A
111	111	530392189	PREDICTED: 6-phosphofructokinase type C isoform X1	Methyl [K455]	[R].MLAIYDGFDGFAKGQIK.[E]	K	N/A	N	N/A	L	N/A
112	112	578831328	PREDICTED: actin, cytoplasmic 2 isoform X1	Methyl [R347]	[KR].SYELPDGQVITIGNERFR.[C]	R	R	R	R	R	R
113	113	530362759	PREDICTED: ATP synthase F(0) complex subunit B1, mitochondrial isoform X1	Methyl [R330]	[R].NNIAMALEVTYRER.[L]	R	R	N/A	N/A	N/A	N/A
114	114	530373069	PREDICTED: DNA topoisomerase 2-beta isoform X1	Methyl [K970]	[K].EQVLEPMLNGTDKTPALISDYK.[E]	K	K	K	K	K	K
115	115	530375267	PREDICTED: F-box-like/WD repeat-containing protein TBL1XR1 isoform X1	Dimethyl [K135]	[R].DKLAQQQAAAAAAAAAAASQQGSAK.[N]	K	N/A	K	N/A	N/A	K
116	116	530381931	PREDICTED: heat shock protein HSP 90-beta isoform X1	Methyl [K53]	[R].ELISNASDALDKIR.[LY]	K	K	K	K	K	K
117	117	530364686	PREDICTED: laminin subunit gamma-2 isoform X1	Methyl [R728]	[R].MQQAEQALQDILRDAQISEGASR.[S]	R	R	G	R	R	R
118	118	578820358	PREDICTED: L-lactate dehydrogenase A-like 6A isoform X1	Dimethyl [K97]	[K].GETMDLQHGSPFMKMPNIVSSK.[D]	K	N/A	K	K	R	N/A
119	119	578812808	PREDICTED: phosphoacetylglucosamine mutase isoform X3	Methyl [R533]	[R].AFVRPSGTEDVVR.[V]	R	R	R	R	R	R
120	120	578830522	PREDICTED: probable ATP-dependent RNA helicase DDX5 isoform X2	Methyl [R502]	[K].RGGFNTFR.[D]	R	R	R	R	R	R
121	121	578821832	PREDICTED: serpin H1 isoform X3	Methyl [R148]	[R].LYGPSSVSFADDFVRSSK.[Q]	R	N/A	R	R	R	K
122	122	530363142	PREDICTED: splicing factor, proline- and glutamine-rich isoform X2	Methyl [R693]	[R].GMGPGTPAGYGRGR.[E]	R	R	R	R	R	R
123	123	530421539	PREDICTED: ubiquitin-like modifier-activating enzyme 1 isoform X1	Methyl [K889]	[K].ATLPSPDKLPGFK.[M]	K	N	K	P	K	-
124	124	544186032	protein disulfide-isomerase A6 isoform a	Methyl [K260]	[K].NLEPEWAAAASEVKEQTK.[G]	K	K	K	K	K	K
125	125		protein disulfide-isomerase A6 isoform a	Methyl [R283]	[K].LAAVDATVNQVLASRYGIR.[G]	R	R	K	R	R	R
126	126	4503971	rab GDP dissociation inhibitor alpha	Methyl [R208]	[R].TDDYLDQPCLETVNRIK.[L]	R	R	R	R	R	N/A
127	127	4506787	ras GTPase-activating-like protein IQGAP1	Methyl [R870]	[K].TLINAEDPPMVVVRK.[F]	R	R	R	R	R	R
128	128	316983130	RPL36A-HNRNPH2 protein isoform a	Methyl [K89]	[R].KQSGYGGQTKPIFR.[K]	K	N/A	N/A	N/A	N/A	N/A
129	129	167860126	serpin B5	Methyl [K64]	[K].GDTANEIGQVLHFENVK.[D]	K	K	K	K	K	K
130	130	23618867	sideroflexin-1	Methyl [R233]	[K].QAITQVVVSR.[I]	R	R	R	R	R	R
131	131	38150007	small nuclear ribonucleoprotein-associated proteins B and B' isoform B'	Methyl [R108]	[R].VPLAGAAGGPGIGRAAGR.[G]	R	N/A	R	R	R	R
132	132	55749531	splicing factor 3B subunit 2	Methyl [R245]	[R].VAAPVGPVGPTPTVLPMGAPVPRPR.[G]	R	R	R	R	R	R
133	133		splicing factor 3B subunit 2	Methyl [R247]	[R].VAAPVGPVGPTPTVLPMGAPVPRPR.[G]	R	R	R	R	R	N/A
134	134		splicing factor 3B subunit 2	Methyl [K672]	[K].IPGLNSPIPESCSFGYHAGGWGKPPVDETGKPLYGDVFGTNAAEFQTK.[T]	K	K	K	K	K	N/A
135	135		splicing factor 3B subunit 2	Methyl [K680]	[K].IPGLNSPIPESCSFGYHAGGWGKPPVDETGKPLYGDVFGTNAAEFQTK.[T]	K	K	K	K	K	N/A
136	136	530401025	PREDICTED: squamous cell carcinoma antigen recognized by T-cells 3 isoform X1	Methyl [R924]	[K].APGGPMLLPQTYGARGK.[G]	R	R	R	R	R	R
137	137		PREDICTED: squamous cell carcinoma antigen recognized by T-cells 3 isoform X1	Methyl [K926]	[K].APGGPMLLPQTYGARGK.[G]	K	K	K	K	K	K
138	138	115387094	succinate dehydrogenase [ubiquinone] iron-sulfur subunit, mitochondrial precursor	Methyl [K80]	[K].IKNEVDSTLTFR.[R]	K	K	K	N/A	N/A	K
139	139	21327701	TATA-binding protein-associated factor 2N isoform 1	Dimethyl [R206]	[R].GPMTGSSGGDRGGFK.[N]	R	R	R	R	R	R
140	140	24307939	T-complex protein 1 subunit epsilon	Methyl [K150]	[R].VAIEHLDKISDSVLVDIKDTEPLIQTAK.[T]	K	K	K	K	K	K
141	141	48762932	T-complex protein 1 subunit theta isoform 1	Methyl [K296]	[K].AIADTGANVVVTGGKVADMALHYANK.[Y]	K	K	K	K	K	K
142	142	40317626	thrombospondin-1 precursor	Methyl [R189]	[K].MENAELDVPIQSVFTRDLASIAR.[L]	R	R	R	N/A	R	R
143	143	5803187	transaldolase	Methyl [K81]	[K].LGGSQEDQIKNAIDKLFVLFGAEILK.[K]	K	T	K	K	K	Q
144	144	469608410	transgelin-2 isoform a	Methyl [K109]	[K].IQASTMAFKQMEQISQFLQAAER.[Y]	K	K	K	K	K	K
145	145	384475521	transketolase isoform 2	Methyl [K102]	[R].KISSDLDGHPVPK.[Q]	K	K	K	K	K	K
146	146	226529917	triosephosphate isomerase isoform 2	Methyl [K106]	[K].IAVAAQNCYKVTNGAFTGEISPGMIK.[D]	K	K	K	K	K	K
147	147		triosephosphate isomerase isoform 2	Methyl [K256]	[R].IIYGGSVTGATCKELASQPDVDGFLVGGASLK.[P]	K	K	K	K	K	K
148	148	14389309	tubulin alpha-1C chain	Methyl [R79]	[R].AVFVDLEPTVIDEVR.[T]	R	R	R	R	R	R
149	149	17921993	tubulin alpha-3C/D chain	Methyl [R79]	[R].AVFVDLEPTVVDEVRTGTYR.[Q]	R	R	R	R	R	R
150	150		tubulin alpha-3C/D chain	Methyl [K112]	[R].GHYTIGKEIVDLVLDRIR.[K]	K	K	K	K	K	K
151	151	29788785	tubulin beta chain isoform b	Methyl [R46]	[K].FWEVISDEHGIDPTGTYHGDSDLQLDRISVYYNEATGGK.[V]	R	R	R	R	R	R
152	152		tubulin beta chain isoform b	Methyl [K103]	[R].SGPFGQIFRPDNFVFGQSGAGNNWAK.[G]	K	K	K	K	K	K
153	153	4507729	tubulin beta-2A chain	Methyl [R46]	[K].FWEVISDEHGIDPTGTYHGDSDLQLDRISVYYNEATGGK.[V]	R	R	R	R	N/A	N/A
154	154		tubulin beta-2A chain	Methyl [ K103]	[R].SGPFGQIFRPDNFVFGQSGAGNNWAK.[G]	K	K	K	K	N/A	N/A
155	155	50592996	tubulin beta-3 chain isoform 1	Methyl [R156]	[K].VREEYPDRIMNTFSVVPSPK.[V]	R	N/A	R	R	R	R
156	156	21361322	tubulin beta-4A chain isoform 3	Methyl [K103]	[R].SGPFGQIFRPDNFVFGQSGAGNNWAK.[G]	K	K	K	K	K	N/A
157	157	5174735	tubulin beta-4B chain	Methyl [K103]	[R].SGPFGQIFRPDNFVFGQSGAGNNWAK.[G]	K	K	K	K	K	N/A
158	158	14210536	tubulin beta-6 chain	Methyl [K103]	[R].SGPFGQIFRPDNFVFGQSGAGNNWAK.[G]	K	K	K	K	K	K
159	159	566006139	uridine phosphorylase 1 isoform a	Methyl [R64]	[K].FVCVGGSPSRMK.[A]	K	K	N	E	K	K
						N/A, sequence not available; Dash, sequence gap

## Sheet: Acetylation-Lysine
#No	Accession	Description	Modifications	Peptide	Human	Pig	Mouse	Dog	Horse	Chicken
1	4501881	actin, alpha skeletal muscle	Acetyl [K52]	[R].HQGVMVGMGQKDSYVGDEAQSK.[R]	K	K	K	K	K	K
2	223468663	aldo-keto reductase family 1 member B10	Acetyl [K195]	[K].YKPVTNQVECHPYLTQEKLIQYCHSK.[G]	K	E	K	K	K	E
3	4502049	aldose reductase	Acetyl [K203]	[K].YKPAVNQIECHPYLTQEKLIQYCQSK.[G]	K	R	K	K	K	R
4	4501891	alpha-actinin-1 isoform b	Acetyl [K682]	[K].SIVNYKPKIDQLEGDHQLIQEALIFDNK.[H]	K	K	K	K	K	K
5		alpha-actinin-1 isoform b	Acetyl [K684]	[K].SIVNYKPKIDQLEGDHQLIQEALIFDNK.[H]	K	K	K	K	K	K
6	4503471	elongation factor 1-alpha 1	Acetyl [K273]	[R].VETGVLKPGMVVTFAPVNVTTEVK.[S]	K	K	K	K	K	K
7	7657069	ERO1-like protein alpha precursor	Acetyl [K210]	[K].IWNVIYEENCFKPQTIK.[R]	K	K	K	K	K	K
8		ERO1-like protein alpha precursor	Acetyl [K215]	[K].IWNVIYEENCFKPQTIK.[R]	K	K	K	K	K	K
9	208431833	polyadenylate-binding protein 4 isoform 1	Acetyl [K540]	[R].LAMDFGGAGAAQQGLTDSCQSGGVPTAVQNLAPRAAVAAAAPRAVAPYK.[Y]	K	K	K	N/A	K	K
10	578831328	PREDICTED: actin, cytoplasmic 2 isoform X1	Acetyl [K143]	[R].HQGVMVGMGQKDSYVGDEAQSK.[R]	K	K	K	K	K	K
11	578822814	PREDICTED: alpha-2-macroglobulin isoform X1	Acetyl [K1162]	[K].ALLAYAFALAGNQDK.[R]	K	K	K	K	K	N/A
12	530417837	PREDICTED: BPI fold-containing family A member 2 isoform X1	Acetyl [K91]	[K].AQEAEKLLNNVISK.[L]	K	K	K	K	K	K
13	530378226	PREDICTED: calcium/calmodulin-dependent protein kinase type II subunit delta isoform X1	Acetyl [K362]	[K].ANVVTSPKENIPTPALEPQTTVIHNPDGNK.[E]	K	K	K	N/A	N/A	N/A
14	530382418	PREDICTED: dystonin isoform X1	Acetyl [K5756]	[K].LEEQIAQHK.[VA]	K	K	K	K	K	K
15	578839603	PREDICTED: HLA class I histocompatibility antigen, alpha chain G isoform X1	Acetyl [K168]	[R].SWTAADTAAQISK.[R]	K	K	N/A	N/A	R	N/A
16	578827087	PREDICTED: pyruvate kinase PKM isoform X4	Acetyl [K549]	[R].GIFPVLCKDPVQEAWAEDVDLR.[V]	K	N/A	K	N/A	N/A	K
17	530390113	PREDICTED: talin-1 isoform X1	Acetyl [K2328]	[K].LEQLKPRAK.[P]	K	K	K	K	K	K
18	578826104	PREDICTED: tryptophan--tRNA ligase, cytoplasmic isoform X5	Acetyl [K249]	[K].TFIFSDLDYMGMSSGFYK.[N]	K	K	R	K	R	K
19	4826730	serine/threonine-protein kinase mTOR	Acetyl [K1068]	[R].EFWVMNTSIQSTIILLIEQIVVALGGEFK.[L]	K	K	K	K	N/A	K
20	4502027	serum albumin preproprotein	Acetyl [K438]	[K].KVPQVSTPTLVEVSR.[N]	K	N/A	N/A	N/A	N/A	N/A
21		serum albumin preproprotein	Acetyl [K549]	[K].KQTALVELVK.[H]	K	N/A	N/A	N/A	N/A	N/A
22	55749531	splicing factor 3B subunit 2	Acetyl [K672]	[K].IPGLNSPIPESCSFGYHAGGWGKPPVDETGKPLYGDVFGTNAAEFQTK.[T]	K	K	K	K	K	T
23		splicing factor 3B subunit 2	Acetyl [K680]	[K].IPGLNSPIPESCSFGYHAGGWGKPPVDETGKPLYGDVFGTNAAEFQTK.[T]	K	K	K	K	K	H
24	170296790	trypsin-3 isoform 1 preproprotein	Acetyl [K136]	[R].LGEHNIKVLEGNEQFINAAK.[I]	K	N/A	N/A	N/A	N/A	N/A
	20 proteins

## Sheet: Acetylation-Serine
#No	Accession	Description	Modifications	Peptide	Human	Pig	Mouse	Dog	Horse	Chicken
1	4885049	actin, alpha cardiac muscle 1 proprotein	Acetyl [S54]	[R].HQGVMVGMGQKDSYVGDEAQSK.[R]	S	S	S	S	S	S
2	4809279	annexin A7 isoform 2	Acetyl [S394]	[R].DLLSSVSR.[E]	S	S	S	S	S	S
3		annexin A7 isoform 2	Acetyl [ S396]	[R].DLLSSVSR.[E]	S	G	S	A	G	D
4	56549668	AT-rich interactive domain-containing protein 2	Acetyl [S297]	[R].NLSFEEGNVK.[L]	S	S	S	S	S	S
5	4557481	canalicular multispecific organic anion transporter 1	Acetyl [S844]	[K].GSYSALLAK.[K]	S	S	S	S	P	S
6		canalicular multispecific organic anion transporter 1	Acetyl [S846]	[K].GSYSALLAK.[K]	S	S	S	N	S	S
7	4503685	farnesyl pyrophosphate synthase isoform a	Acetyl [S73]	[R].MNGDQNSDVYAQEK.[Q]	S	L	L	L	L	L
8	167466173	heat shock 70 kDa protein 1A/1B	Acetyl [S106]	[K].VQVSYKGETK.[A]	S	S	N	S	S	E
9	20336761	heme-binding protein 1	Acetyl [S116]	[R].IPNQFQSDPPAPSDKSVKIEER.[E]	S	S	S	T	S	S
10	70778918	inter-alpha-trypsin inhibitor heavy chain H2 precursor	Acetyl [S83]	[K].VQSTITSR.[M]	S	S	S	S	S	S
11	38045910	laminin subunit alpha-3 isoform 1 precursor	Acetyl [S2164]	[R].NASGDELVR.[C]	S	S	S	S	S	R
12	4557707	neural cell adhesion molecule L1 isoform 1 precursor	Acetyl [S664]	[K].EMAPEKWYSLGKVPGNQTSTTLK.[L]	S	S	S	S	S	S
13	14141168	poly(rC)-binding protein 2 isoform a	Acetyl [S84]	[K].AFAMIIDKLEEDISSSMTNSTAASRPPVTLR.[L]	S	S	S	S	S	S
14	578831328	PREDICTED: actin, cytoplasmic 2 isoform X1	Acetyl [S145]	[R].HQGVMVGMGQKDSYVGDEAQSK.[R]	S	S	S	S	S	S
15		PREDICTED: actin, cytoplasmic 2 isoform X1	Acetyl [S393]	[K].DLYANTVLSGGTTMYPGIADR.[M]	S	S	S	S	S	S
16	578808374	PREDICTED: biorientation of chromosomes in cell division protein 1-like 1 isoform X3	Acetyl [S810]	[K].DGKPVSEYIIK.[T]	S	S	S	S	S	S
17	530361113	PREDICTED: heterochromatin protein 1-binding protein 3 isoform X3	Acetyl [S465]	[K].SPGKAASVK.[Q]	S	A	S	S	S	S
18		PREDICTED: heterochromatin protein 1-binding protein 3 isoform X3	Acetyl [S471]	[K].SPGKAASVK.[Q]	S	S	S	S	P	P
19	578839603	PREDICTED: HLA class I histocompatibility antigen, alpha chain G isoform X1	Acetyl [S167]	[R].SWTAADTAAQISK.[R]	S	N/A	T	N/A	T	N/A
20	530383554	PREDICTED: monofunctional C1-tetrahydrofolate synthase, mitochondrial isoform X4	Acetyl [S570]	[R].LDIDPSTITWQR.[V]	S	A	A	S	S	S
21	530410341	PREDICTED: myosin-10 isoform X1	Acetyl [S1044]	[R].IAECSSQLAEEEEKAK.[N]	S	S	S	S	S	S
22	578815313	PREDICTED: pericentriolar material 1 protein isoform X14	Acetyl [S1386]	[K].ASAQASLASKDK.[T]	S	S	S	S	S	S
23	578827402	PREDICTED: SAFB-like transcription modulator isoform X3	Acetyl [S1028]	[R].EVSGHSVR.[G]	S	S	T	S	S	-
24	578801849	PREDICTED: ubiquitin-associated protein 2-like isoform X19	Acetyl [S1003]	[K].TQQSFEK.[Q]	S	S	S	-	S	S
25	32483399	serine/threonine-protein kinase PAK 2	Acetyl [S42]	[K].DPLSANHSLKPLPSVPEEK.[K]	S	S	-	N/A	S	S
26	401461775	trafficking protein particle complex subunit 3 isoform 2	Acetyl [S50]	[K].ILFSNFLPR.[G]	S	-	-	-	-	-
27	5803187	transaldolase	Acetyl [S13]	[R].MESALDQLK.[Q]	S	S	S	S	S	S
28	347360922	transformation/transcription domain-associated protein isoform 1	Acetyl [S3255]	[K].LLLNLISQVGR.[V]	S	S	S	S	S	S
29	4507729	tubulin beta-2A chain	Acetyl [S364]	[K].MSATFIGNSTAIQELFK.[R]	S	S	S	A	N/A	N/A
30	29788768	tubulin beta-2B chain	Acetyl [S364]	[K].MSATFIGNSTAIQELFK.[R]	S	S	S	A	N/A	N/A
31	5174735	tubulin beta-4B chain	Acetyl [S364]	[K].MSATFIGNSTAIQELFK.[R]	S	S	S	A	N/A	N/A
	27 proteins

## Sheet: Allysine
No	Accession	Description	Modifications	Peptide	Human	Pig	Mouse	Dog	Horse	Chicken
1	5803225	14-3-3 protein epsilon	Lys->Allysine [K244]	[R].DNLTLWTSDMQGDGEEQNKEALQDVEDENK.[V]	K	K	K	K	K	K
2	4758504	3-hydroxyacyl-CoA dehydrogenase type-2 isoform 1	Lys->Allysine [K172]	[R].GVIINTASVAAFEGQVGQAAYSASK.[G]	K	K	K	K	K	K
3	13904870	40S ribosomal protein S5	Lys->Allysine [K182]	[K].TIAECLADELINAAKGSSNSYAIK.[K]	K	N/A	N/A	N/A	N/A	N/A
4	41399285	60 kDa heat shock protein, mitochondrial	Lys->Allysine [K417]	[K].VGGTSDVEVNEKK.[D]	K	K	K	K	K	K
5	4503571	alpha-enolase isoform 1	Lys->Allysine [K326]	[K].FTASAGIQVVGDDLTVTNPKR.[I]	K	K	K	N/A	N/A	K
6	100913206	ATP-dependent RNA helicase A	Lys->Allysine [K314]	[K].DLEHQLQNIIQELNLEILPPPEDPSVPVALNIGKLAQFEPSQR.[Q]	K	N/A	K	N/A	K	N/A
7	148539846	desmocollin-3 isoform Dsc3a preproprotein	Lys->Allysine [K381]	[R].IPIEDKDLINTANWR.[V]	K	N/A	N/A	N/A	N/A	N/A
8	91199540	dihydrolipoyl dehydrogenase, mitochondrial isoform 1 precursor	Lys->Allysine [K320]	[R].RPFTKNLGLEELGIELDPR.[G]	K	N/A	N/A	N/A	N/A	N/A
9	4503607	electron transfer flavoprotein subunit alpha, mitochondrial isoform a	Lys->Allysine [K203]	[K].ASSTSPVEISEWLDQKLTK.[S]	K	N/A	N/A	N/A	N/A	N/A
10	7669492	glyceraldehyde-3-phosphate dehydrogenase isoform 1	Lys->Allysine [K309]	[K].GILGYTEHQVVSSDFNSDTHSSTFDAGAGIALNDHFVK.[L]	K	K	K	K	K	K
11	261878575	guanine nucleotide-binding protein G(i) subunit alpha-2 isoform 2	Lys->Allysine [K9]	[R].GAGESGKSTIVK.[Q]	K	-	K	K	K	K
12		guanine nucleotide-binding protein G(i) subunit alpha-2 isoform 2	Lys->Allysine [K14]	[R].GAGESGKSTIVK.[Q]	K	-	K	K	K	K
13	5729877	heat shock cognate 71 kDa protein isoform 1	Lys->Allysine [K25]	[K].GPAVGIDLGTTYSCVGVFQHGK.[V]	K	K	K	K	K	K
14		heat shock cognate 71 kDa protein isoform 1	Lys->Allysine [K159]	[R].QATKDAGTIAGLNVLR.[I]	K	K	K	K	K	K
15		heat shock cognate 71 kDa protein isoform 1	Lys->Allysine [K328]	[K].LDKSQIHDIVLVGGSTR.[I]	K	K	K	K	K	K
16		heat shock cognate 71 kDa protein isoform 1	Lys->Allysine [K384]	[K].SINPDEAVAYGAAVQAAILSGDK.[S]	K	K	K	K	K	K
17	4504517	heat shock protein beta-1	Lys->Allysine [K141]	[R].KYTLPPGVDPTQVSSSLSPEGTLTVEAPMPK.[L]	K	K	K	K	K	K
18	52632383	heterogeneous nuclear ribonucleoprotein L isoform a	Lys->Allysine [K178]	[R].QALVEFEDVLGACNAVNYAADNQIYIAGHPAFVNYSTSQK.[I]	K	K	K	K	K	K
19	296179427	hydroxyacyl-coenzyme A dehydrogenase, mitochondrial isoform 1 precursor	Lys->Allysine [K125]	[K].TLSTIATSTDAASVVHSTDLVVEAIVENLKVK.[N]	K	K	K	K	K	E
20	27436946	lamin isoform A	Lys->Allysine [K135]	[R].LKDLEALLNSKEAALSTALSEK.[R]	K	N/A	N/A	N/A	N/A	N/A
21	291575128	L-lactate dehydrogenase B chain	Lys->Allysine [K229]	[K].LGIHPSSCHGWILGEHGDSSVAVWSGVNVAGVSLQELNPEMGTDNDSENWKEVHK.[L]	K	K	K	K	K	K
22	12667788	myosin-9	Lys->Allysine [K1295]	[K].LQVELDNVTGLLSQSDSKSSK.[L]	K	N/A	K	K	K	K
23	530392189	PREDICTED: 6-phosphofructokinase type C isoform X1	Lys->Allysine [K281]	[R].LNIIIVAEGAIDTQNKPITSEKIK.[E]	K	N/A	K	N/A	N/A	K
24	578808374	PREDICTED: biorientation of chromosomes in cell division protein 1-like 1 isoform X3	Lys->Allysine [K807]	[K].DGKPVSEYIIK.[T]	K	K	K	K	K	K
25	530429490	PREDICTED: flotillin-1 isoform X1	Lys->Allysine [K51]	[R].ISLNTLTLNVKSEK.[V]	K	K	K	K	K	R
26	530410341	PREDICTED: myosin-10 isoform X1	Lys->Allysine [K1052]	[R].IAECSSQLAEEEEKAK.[N]	K	K	K	K	K	K
27	23110955	pro-cathepsin H preproprotein	Lys->Allysine [K291]	[K].VNHAVLAVGYGEKNGIPYWIVK.[N]	K	E	Q	Q	E	E
28	21361176	retinal dehydrogenase 1	Lys->Allysine [K410]	[K].EEIFGPVQQIMKFK.[S]	K	K	K	K	K	K
29	32483399	serine/threonine-protein kinase PAK 2	Lys->Allysine [K38]	[K].DPLSANHSLKPLPSVPEEK.[K]	K	K	-	N/A	K	K
30	55749531	splicing factor 3B subunit 2	Lys->Allysine [K697]	[K].IPGLNSPIPESCSFGYHAGGWGKPPVDETGK.[T]	K	K	K	K	K	T
31	98986464	transmembrane emp24 domain-containing protein 10 precursor	Lys->Allysine [K145]	[K].LKPLEVELR.[R]	K	K	K	K	K	K
32	20127408	trifunctional enzyme subunit alpha, mitochondrial precursor	Lys->Allysine [K440]	[R].DSIFSNLTGQLDYQGFEK.[A]	K	K	K	K	K	K
33	25188179	voltage-dependent anion-selective channel protein 3 isoform 1	Lys->Allysine [K109]	[K].LTLDTIFVPNTGKK.[V]	K	K	K	K	K	K
	29 proteins
